# Supplementary material for: Tertiary arsine ligands for the Stille coupling reaction
Source: Royal Society of Chemistry journal article supplement (doi:10.1039/d1dt02955j), 2021-11-09
Supplement: d1dt02955j1.pdf [file d1dt02955j1.pdf]

## Supporting Information

# Tertiary arsine ligands for Stille coupling reaction

Akane Chishiro,<sup>[a]</sup> Masafumi Konishi,<sup>[a]</sup> Ryoto Inaba,<sup>[a]</sup> Takashi Yumura,<sup>[b]</sup> Hiroaki Imoto,<sup>\*[a,c]</sup> and Kensuke Naka<sup>\*[a,c]</sup>

[a] Faculty of Molecular Chemistry and Engineering, Graduate School of Science and Technology, Kyoto Institute of Technology, Goshokaido-cho, Matsugasaki, Sakyo-ku, Kyoto 606-8585, Japan

[b] Faculty of Material Science and Technology, Graduate School of Science and Technology, Kyoto Institute of Technology, Goshokaido-cho, Matsugasaki, Sakyo-ku, Kyoto 606-8585, Japan

[c] Materials Innovation Lab, Kyoto Institute of Technology, Goshokaido-cho, Matsugasaki, Sakyo-ku, Kyoto 606-8585, Japan.

### Contents:

1. NMR Spectra
2. X-ray crystallographic data for single crystalline products
3. DFT calculations

## 1. NMR Spectra

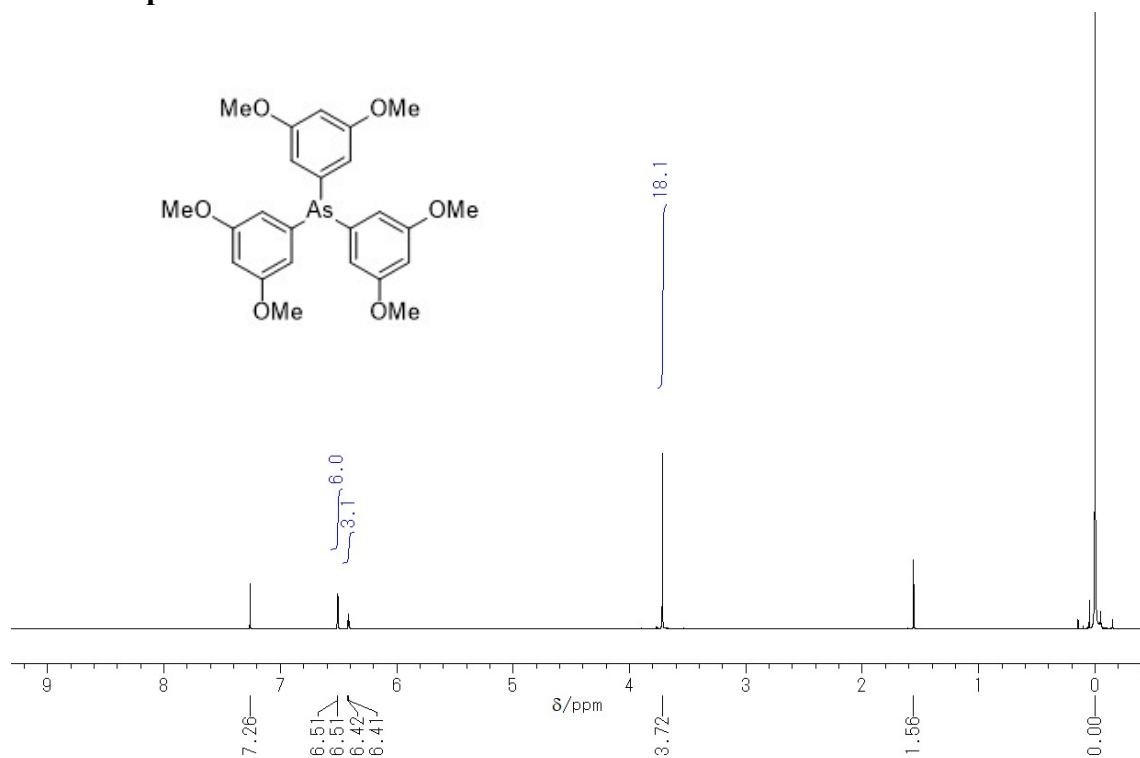

**Figure S1.** <sup>1</sup>H-NMR (400 MHz) spectrum for **1k** in CDCl<sub>3</sub>.

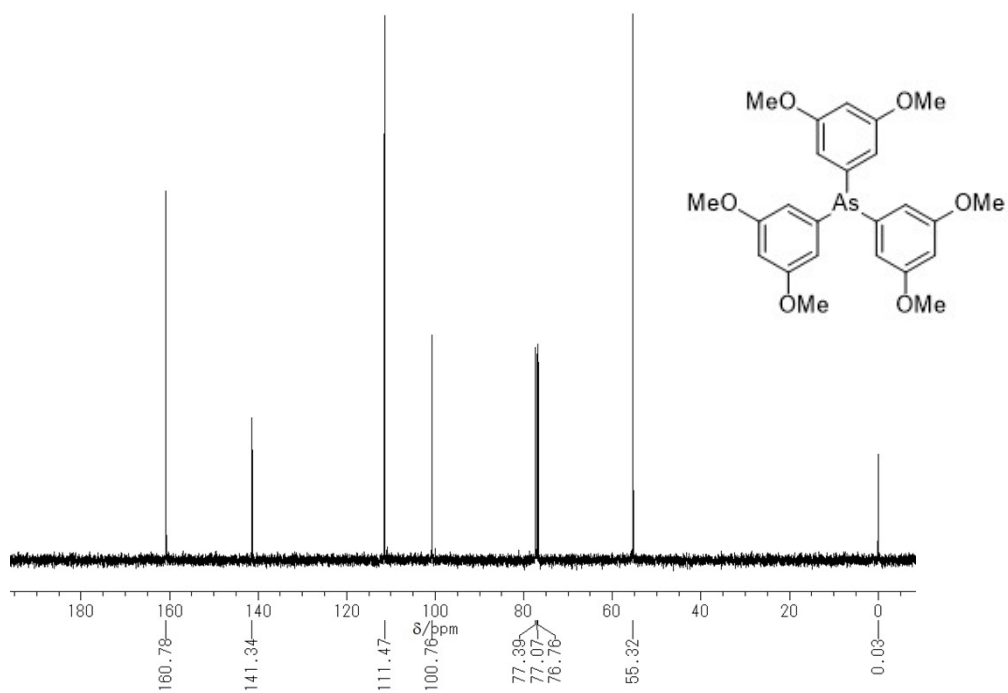

**Figure S2.** <sup>13</sup>C-NMR (100 MHz) spectrum for **1k** in CDCl<sub>3</sub>.

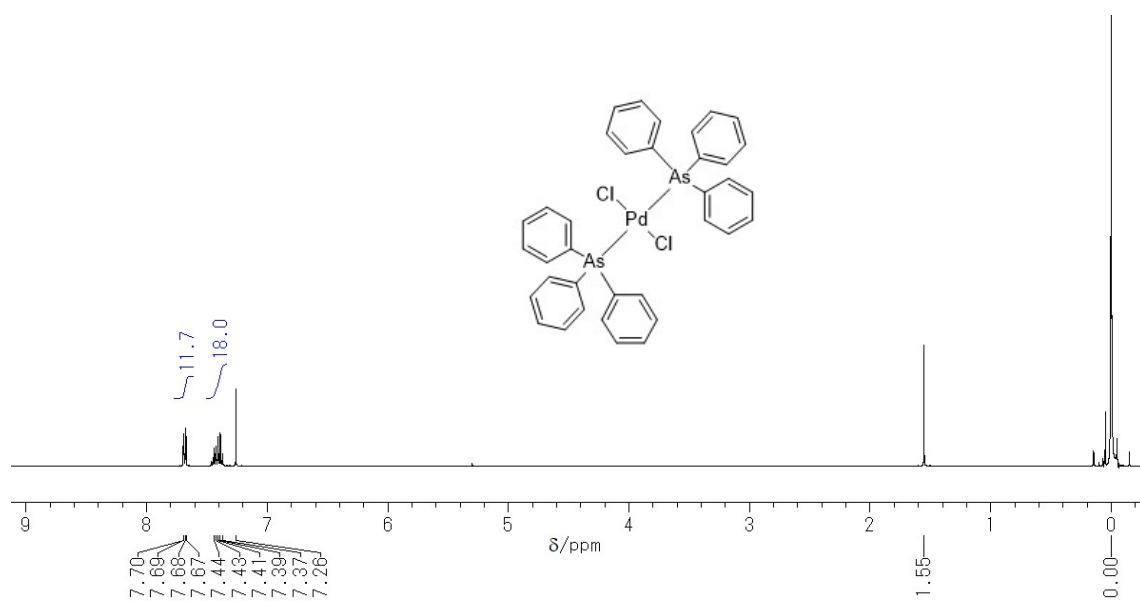

**Figure S3.**  $^1\text{H-NMR}$  (400 MHz) spectrum for  $[\text{PdCl}_2(\text{AsPh}_3)_2]$  in  $\text{CDCl}_3$ .

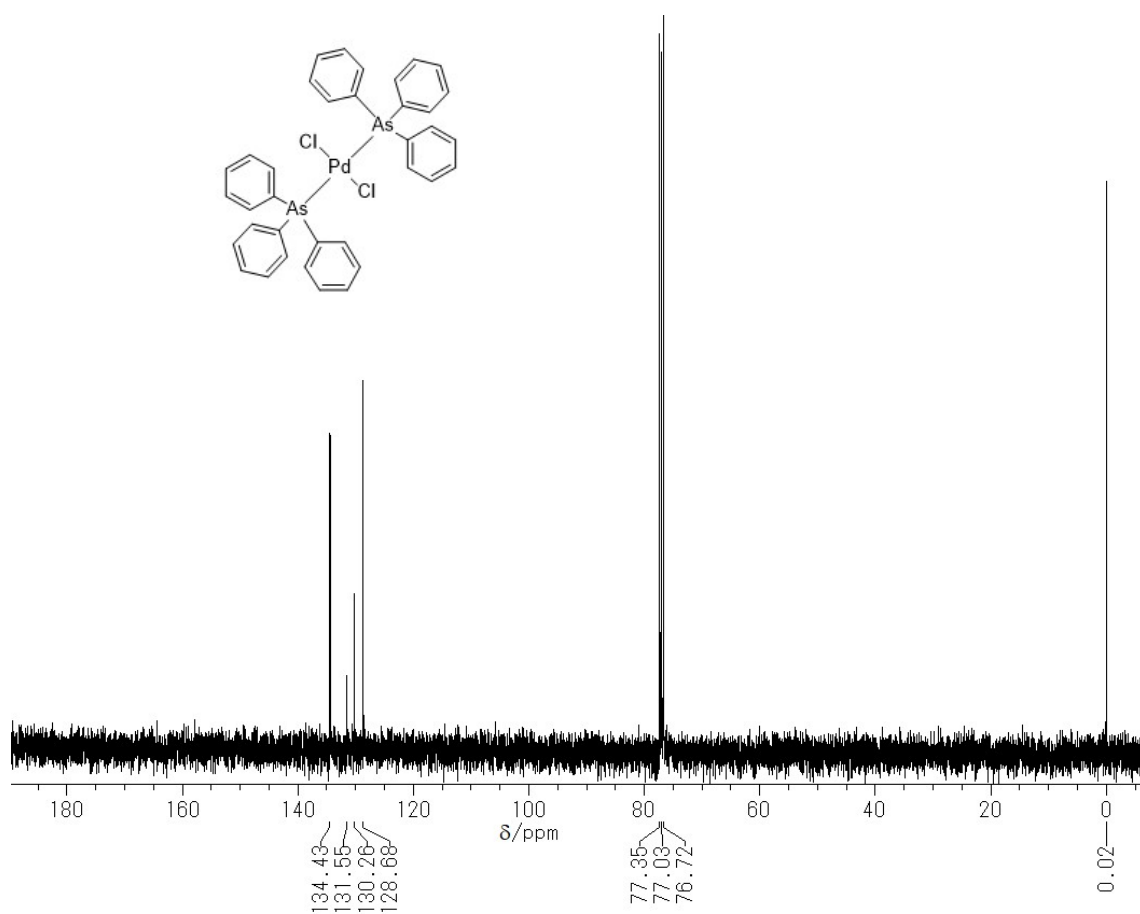

**Figure S4.**  $^{13}\text{C-NMR}$  (100 MHz) spectrum for  $[\text{PdCl}_2(\text{AsPh}_3)_2]$  in  $\text{CDCl}_3$ .

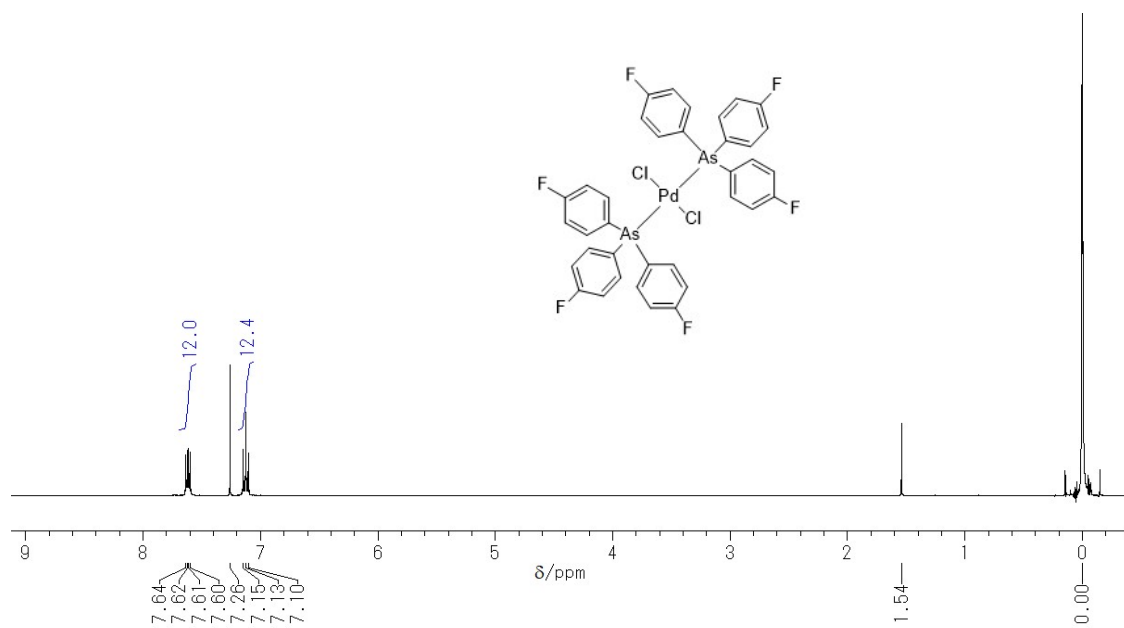

**Figure S5.**  $^1\text{H-NMR}$  (400 MHz) spectrum for  $[\text{PdCl}_2(\mathbf{1a})_2]$  in  $\text{CDCl}_3$ .

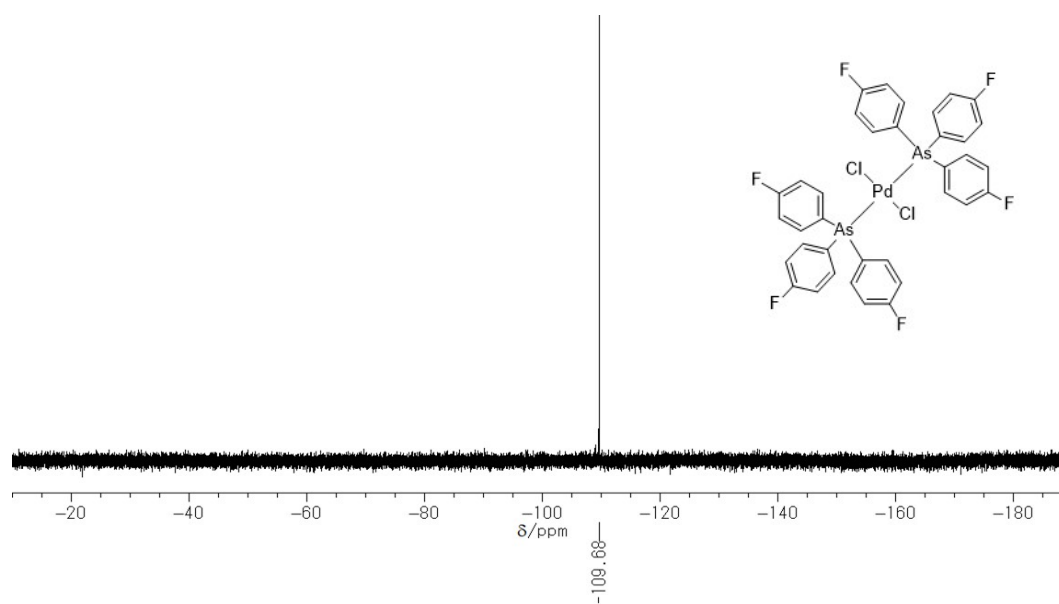

**Figure S6.**  $^{19}\text{F-NMR}$  (376 MHz) spectrum for  $[\text{PdCl}_2(\mathbf{1a})_2]$  in  $\text{CDCl}_3$ .

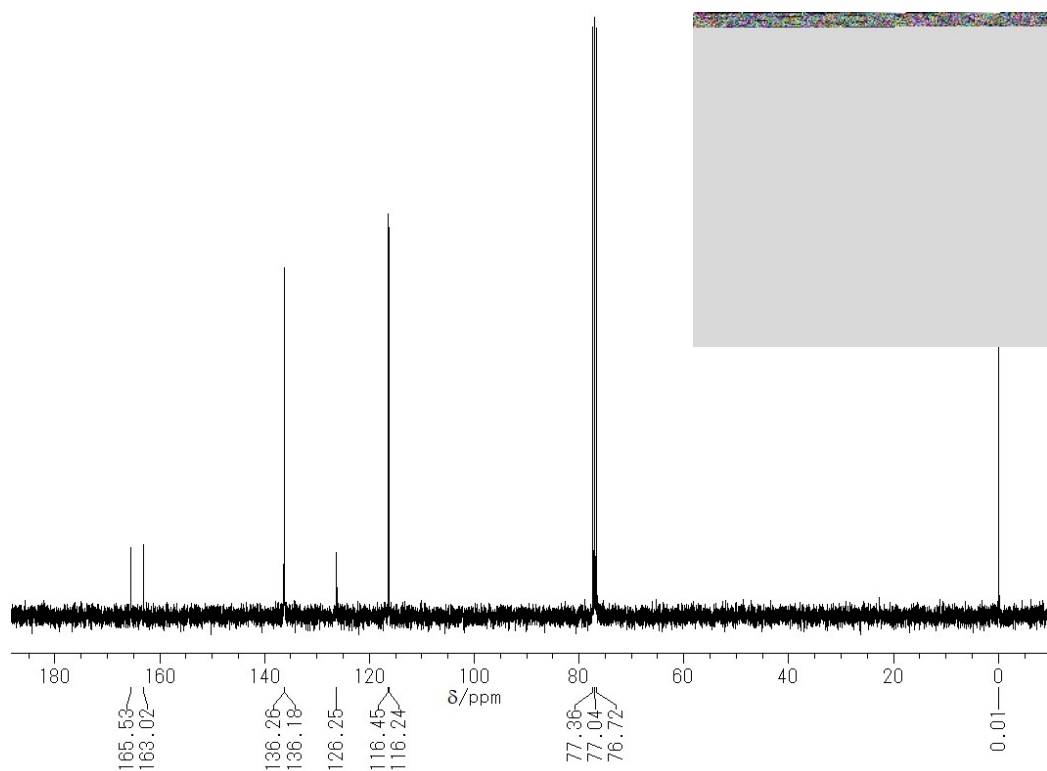

**Figure S7**  $^{13}\text{C}$ -NMR (100 MHz) spectrum for  $[\text{PdCl}_2(\mathbf{1a})_2]$  in  $\text{CDCl}_3$ .

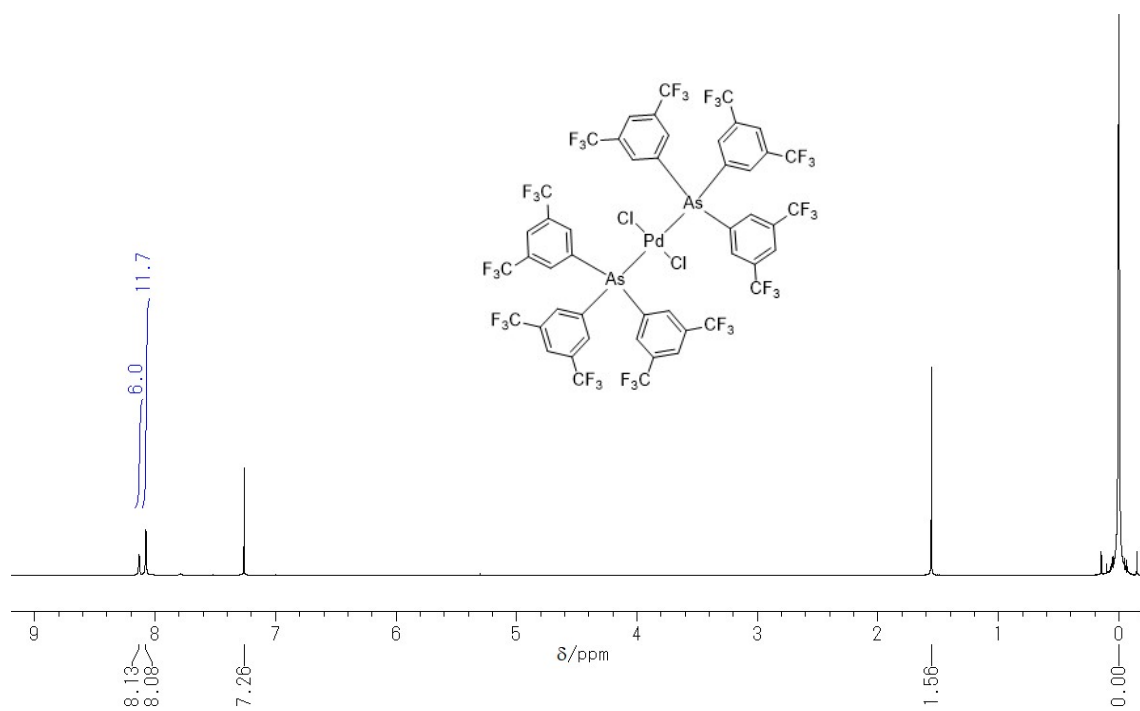

**Figure S8.**  $^1\text{H}$ -NMR (400 MHz) spectrum for  $[\text{PdCl}_2(\mathbf{1d})_2]$  in  $\text{CDCl}_3$ .

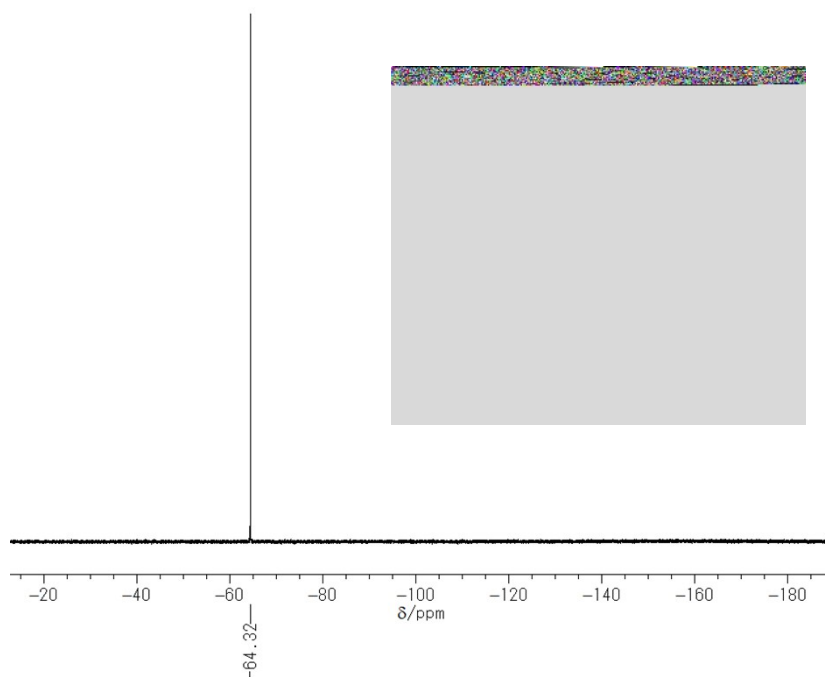

**Figure S9.**  $^{19}\text{F}$ -NMR (376 MHz) spectrum for  $[\text{PdCl}_2(\mathbf{1d})_2]$  in  $\text{CDCl}_3$ .

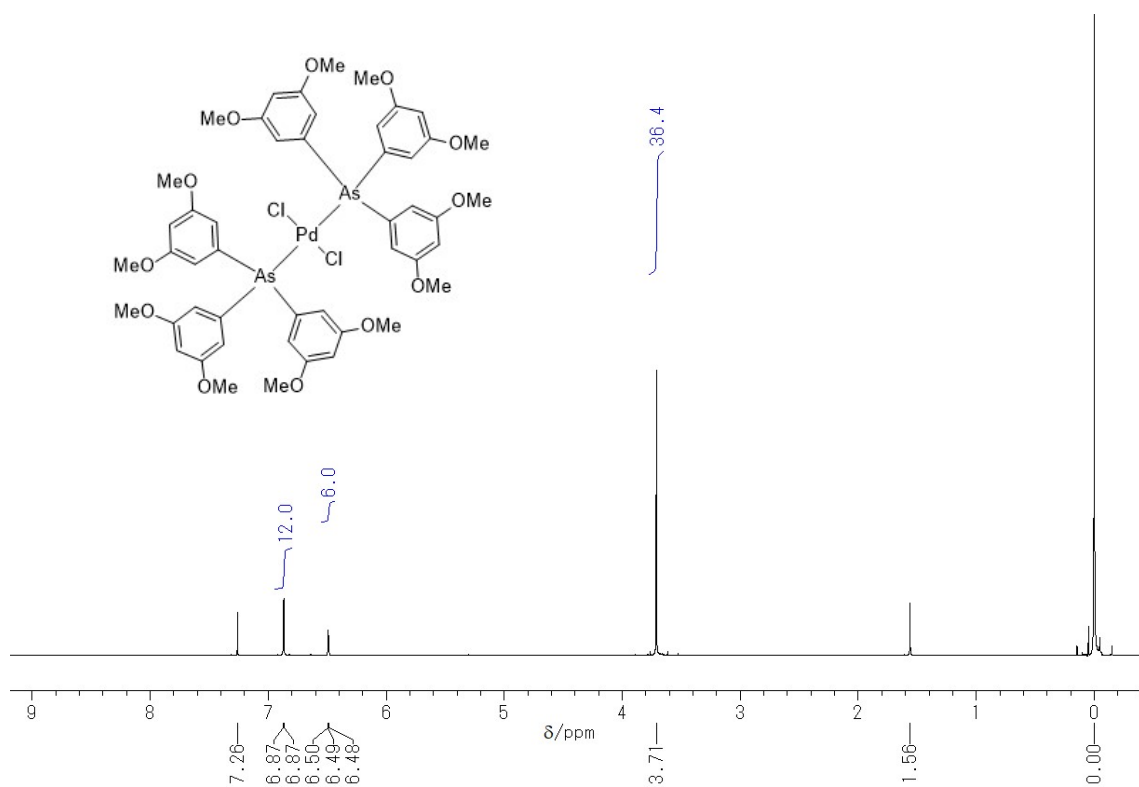

**Figure S10.**  $^1\text{H}$ -NMR (400 MHz) spectrum for  $[\text{PdCl}_2(\mathbf{1k})_2]$  in  $\text{CDCl}_3$ .

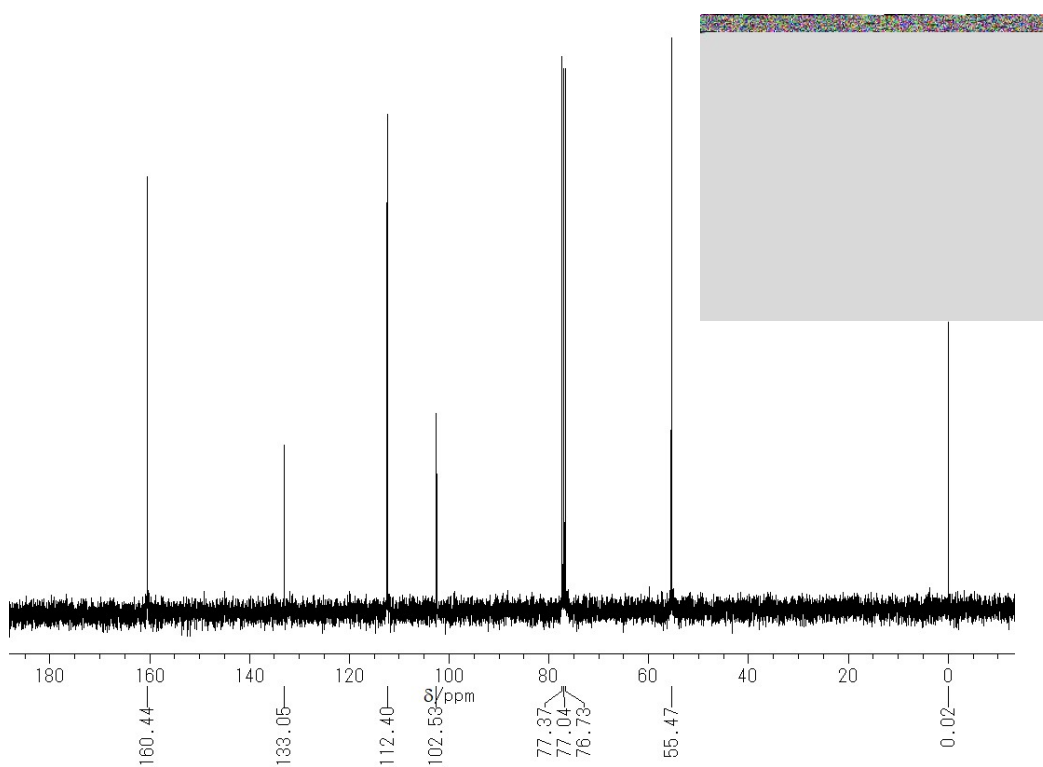

**Figure S11**  $^{13}\text{C}$ -NMR (100 MHz) spectrum for  $[\text{PdCl}_2(\mathbf{1k})_2]$  in  $\text{CDCl}_3$ .

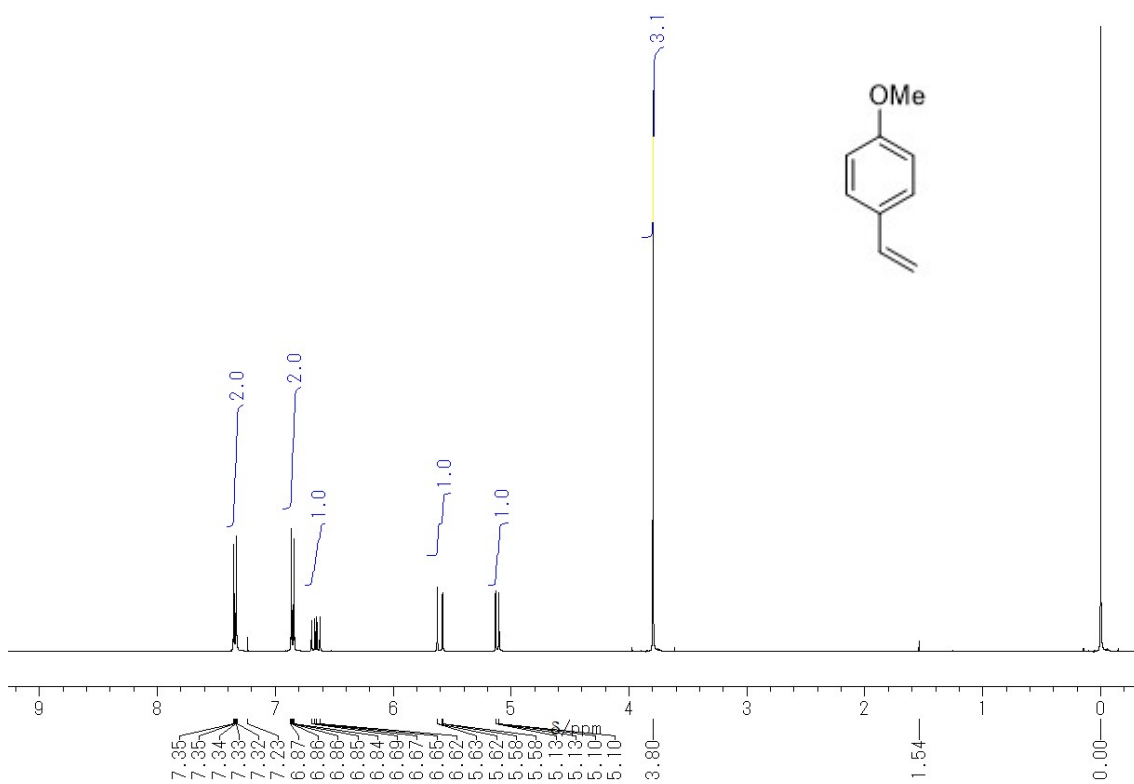

**Figure S12.**  $^1\text{H}$ -NMR (400 MHz) spectrum for 4-Methoxystyrene in  $\text{CDCl}_3$ .

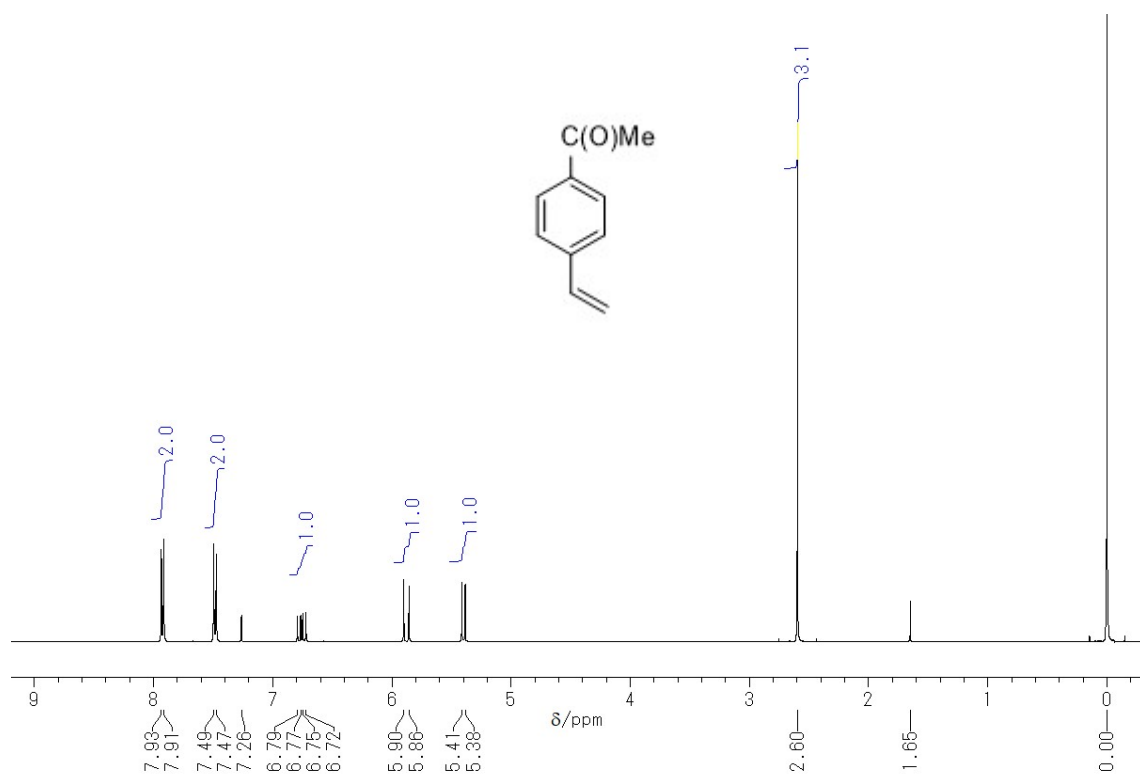

**Figure S13.**  $^1\text{H-NMR}$  (400 MHz) spectrum for **4-Acetylstyrene** in  $\text{CDCl}_3$ .

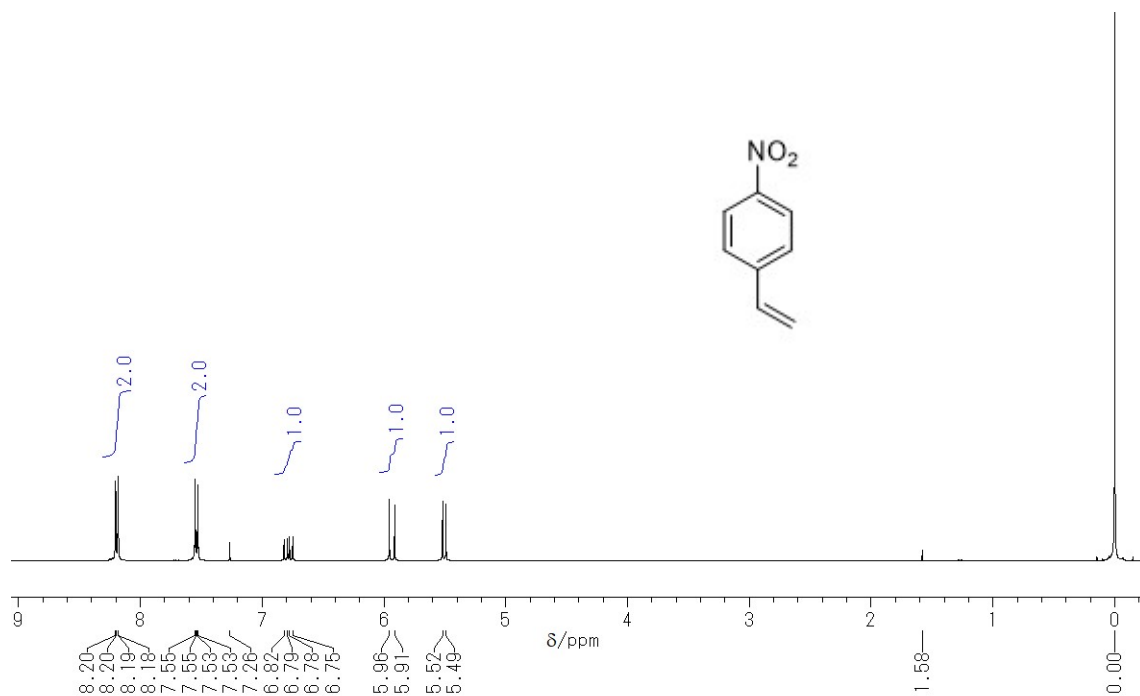

**Figure S14.**  $^1\text{H-NMR}$  (400 MHz) spectrum for **4-Nitrostyrene** in  $\text{CDCl}_3$ .



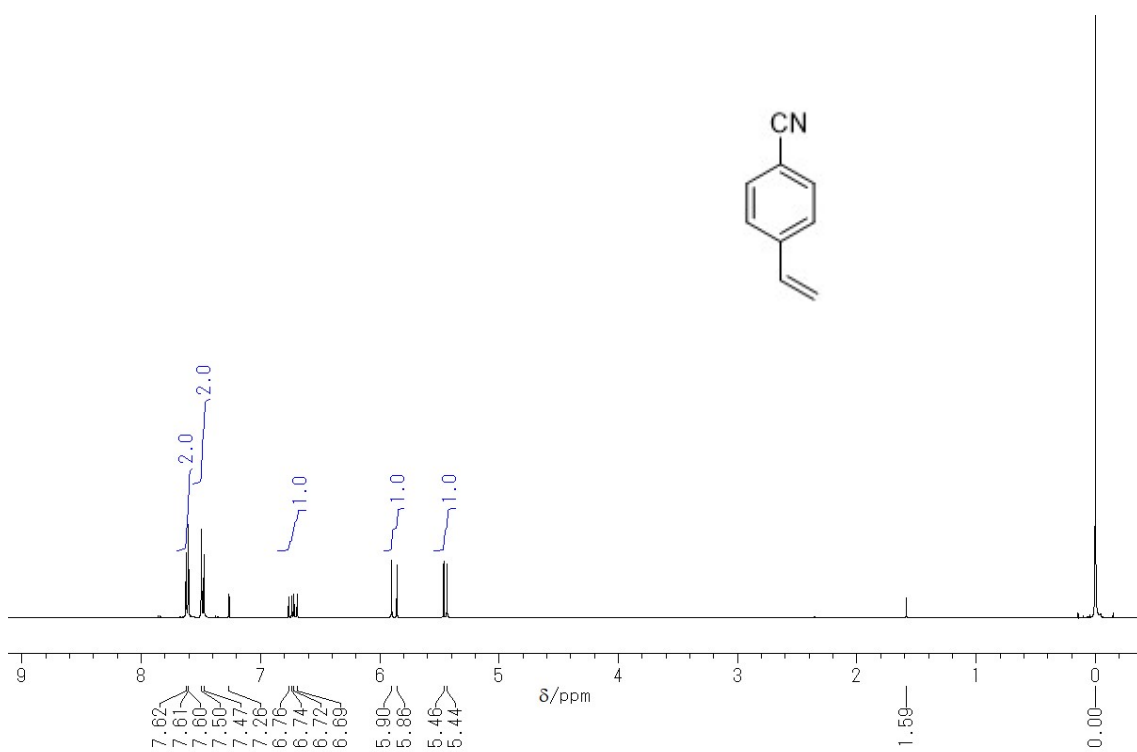

**Figure S15.**  $^1\text{H-NMR}$  (400 MHz) spectrum for **4-Cyanostyrene** in  $\text{CDCl}_3$ .

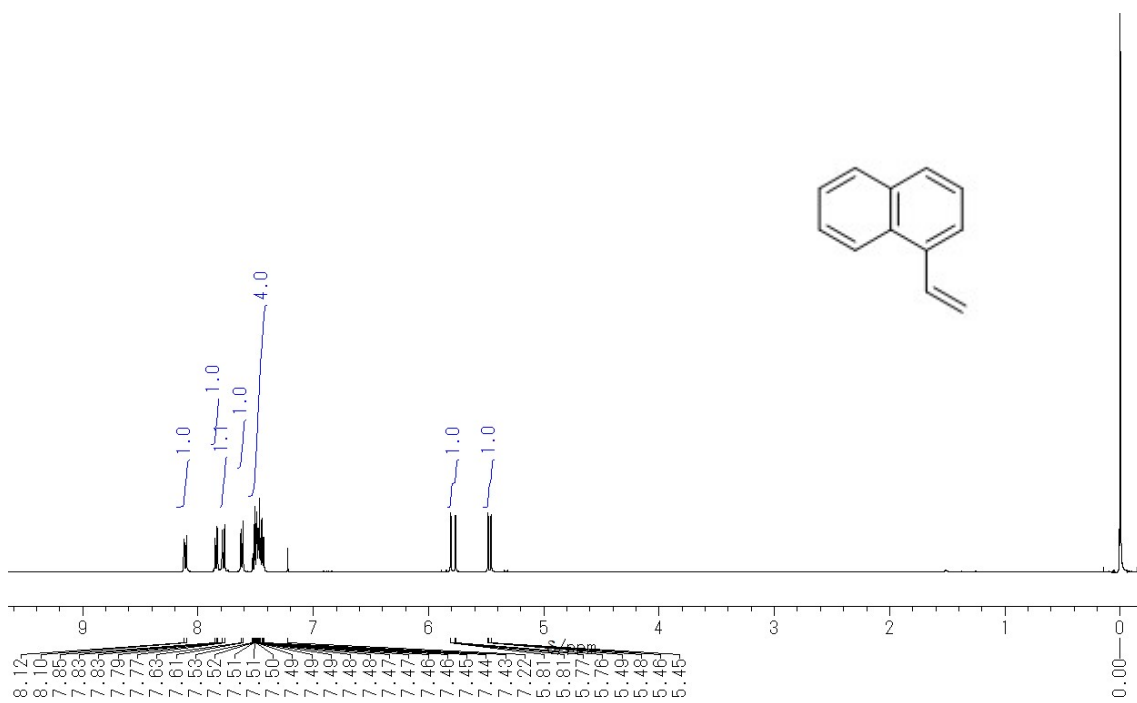

**Figure S16.**  $^1\text{H-NMR}$  (400 MHz) spectrum for **1-Vinylnaphthalene** in  $\text{CDCl}_3$ .

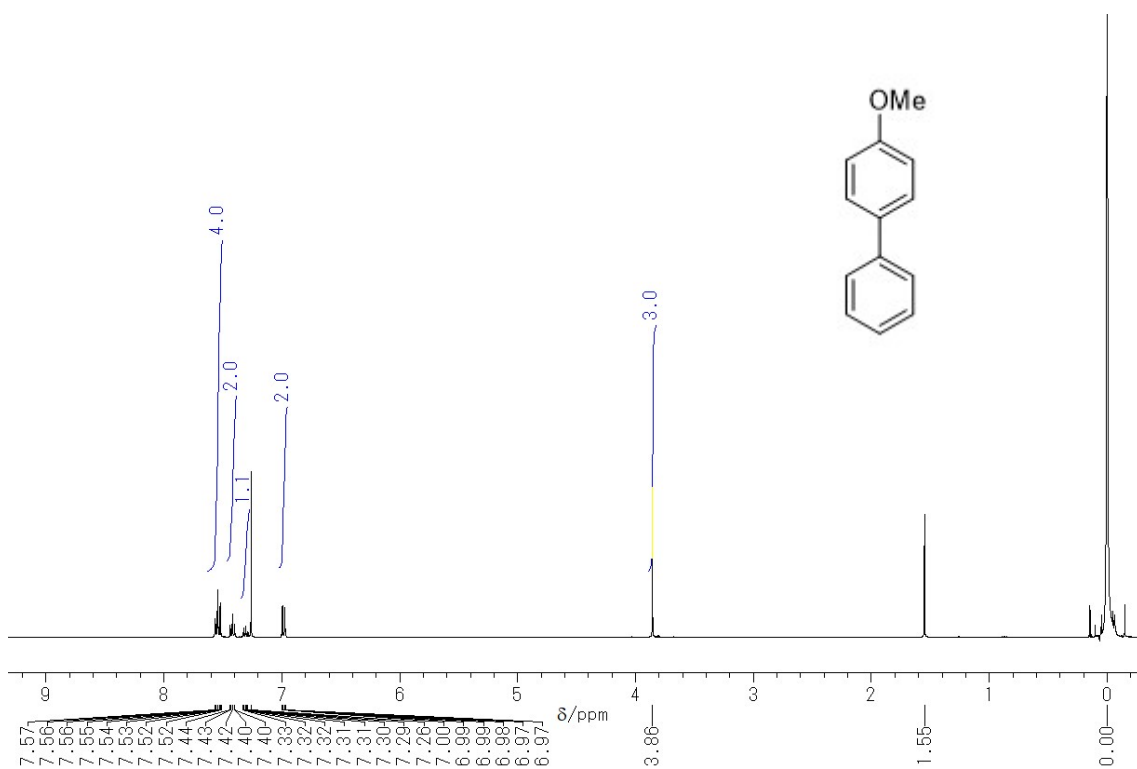

**Figure S17.**  $^1\text{H-NMR}$  (400 MHz) spectrum for **4-Methoxybiphenyl** in  $\text{CDCl}_3$ .

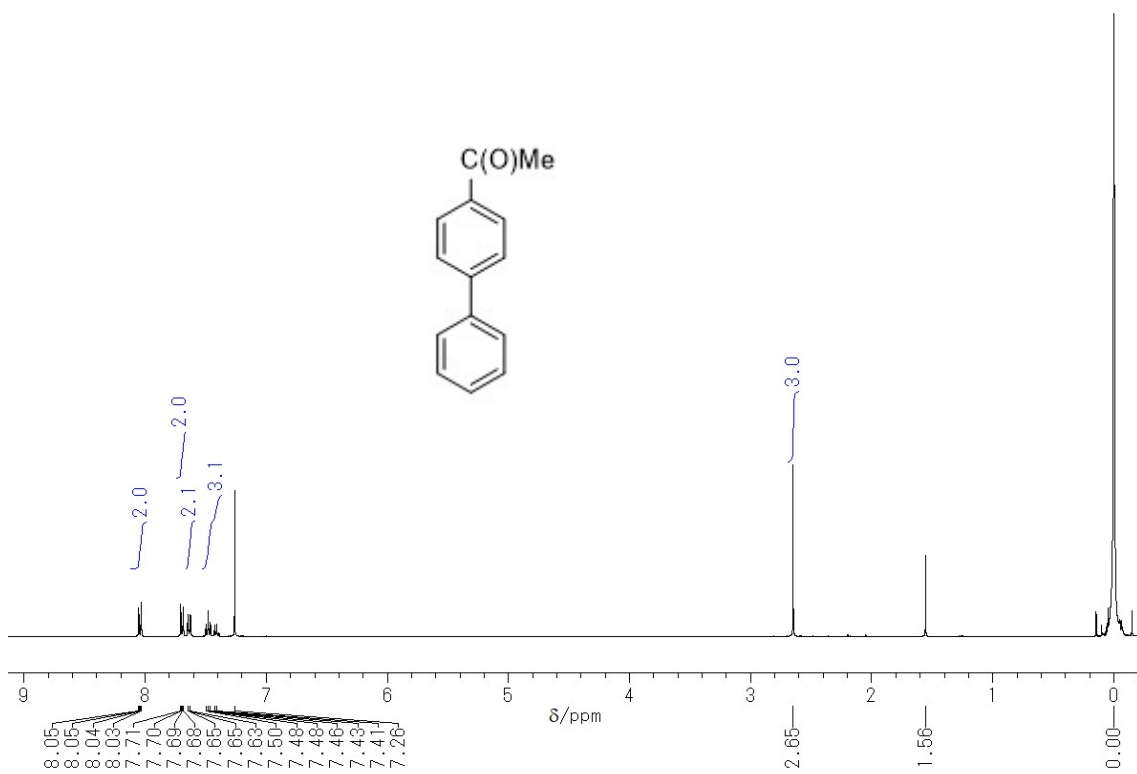

**Figure S18.**  $^1\text{H-NMR}$  (400 MHz) spectrum for **4-Acetylbiphenyl** in  $\text{CDCl}_3$ .

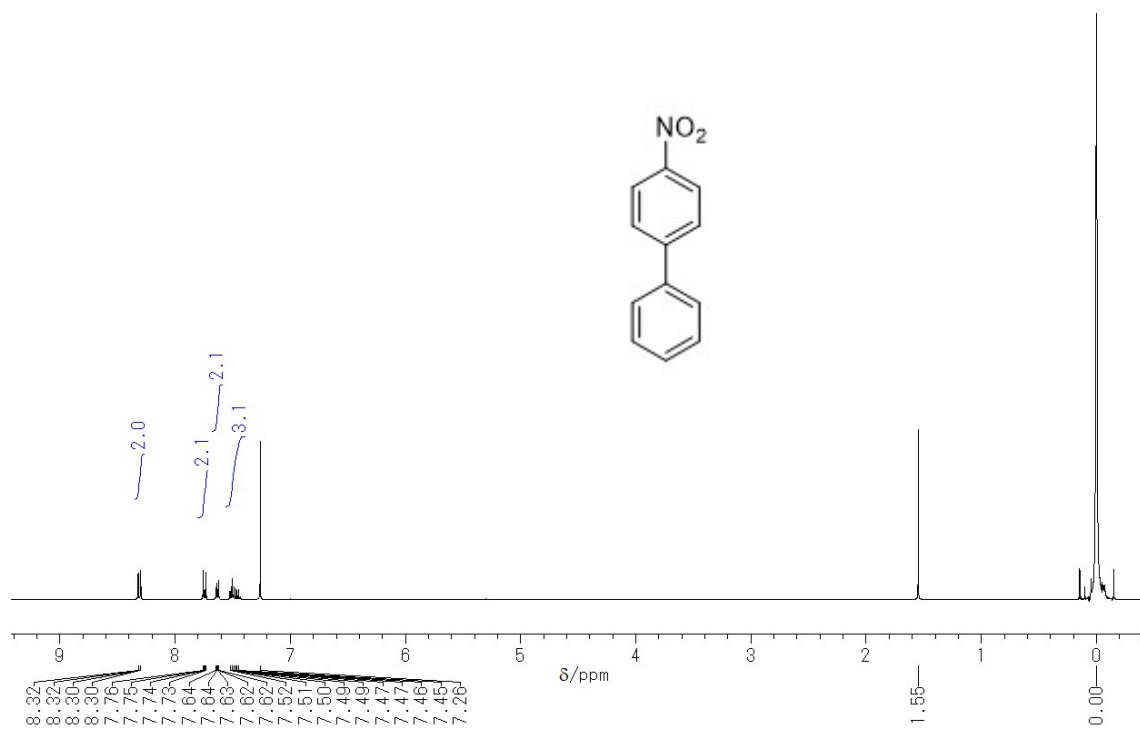

**Figure S19.** <sup>1</sup>H-NMR (400 MHz) spectrum for 4-Nitrobiphenyl in CDCl<sub>3</sub>.

## 2. X-ray crystallographic data for single crystalline products

**Table S1.** Crystallographic Data of [PdCl<sub>2</sub>(ligand)<sub>2</sub>] (ligand = AsPh<sub>3</sub>, **1a**, **1d**).

|                                         | [PdCl <sub>2</sub> (AsPh <sub>3</sub> ) <sub>2</sub> ]             | [PdCl <sub>2</sub> ( <b>1a</b> ) <sub>2</sub> ]                                   | [PdCl <sub>2</sub> ( <b>1d</b> ) <sub>2</sub> ]                                    |
|-----------------------------------------|--------------------------------------------------------------------|-----------------------------------------------------------------------------------|------------------------------------------------------------------------------------|
| Crystal data                            |                                                                    |                                                                                   |                                                                                    |
| Empirical Formula                       | C <sub>36</sub> H <sub>30</sub> As <sub>2</sub> Cl <sub>2</sub> Pd | C <sub>36</sub> H <sub>24</sub> As <sub>2</sub> Cl <sub>2</sub> F <sub>6</sub> Pd | C <sub>49</sub> H <sub>20</sub> As <sub>2</sub> Cl <sub>4</sub> F <sub>36</sub> Pd |
| Formula Weight                          | 789.74                                                             | 897.73                                                                            | 1690.69                                                                            |
| Crystal Dimension, mm <sup>3</sup>      | 0.4 × 0.1 × 0.08                                                   | 0.340 × 0.200 × 0.090                                                             | 0.5 × 0.44 × 0.29                                                                  |
| Crystal System                          | monoclinic                                                         | monoclinic                                                                        | triclinic                                                                          |
| Space Group                             | <i>P</i> 2 <sub>1</sub> / <i>c</i>                                 | <i>C</i> 2/ <i>c</i>                                                              | <i>P</i> -1                                                                        |
| a, Å                                    | 15.146(1)                                                          | 28.18(1)                                                                          | 9.747(4)                                                                           |
| b, Å                                    | 20.085(2)                                                          | 8.095(2)                                                                          | 16.203(6)                                                                          |
| c, Å                                    | 10.528(1)                                                          | 17.069(7)                                                                         | 20.248(8)                                                                          |
| α, deg                                  | -                                                                  | -                                                                                 | 72.26 (2)                                                                          |
| β, deg                                  | 92.131(9)                                                          | 115.517(17)                                                                       | 70.60 (1)                                                                          |
| γ, deg                                  | 90                                                                 | -                                                                                 | 73.96(2)                                                                           |
| Volume, Å <sup>3</sup>                  | 3200.6(5)                                                          | 3513(2)                                                                           | 2818(2)                                                                            |
| D <sub>calcd</sub> , g cm <sup>-3</sup> | 1.639                                                              | 1.679                                                                             | 1.993                                                                              |
| Z                                       | 4                                                                  | 4                                                                                 | 2                                                                                  |
| F(000)                                  | 1568.0                                                             | 1760.00                                                                           | 1636.0                                                                             |
| Data Collection                         |                                                                    |                                                                                   |                                                                                    |
| Temperature, deg                        | -180.0                                                             | 25.0                                                                              | -180.0                                                                             |
| 2θmax, deg                              | 52.74                                                              | 55.0                                                                              | 55.012                                                                             |
| Tmin/Tmax                               | 0.898/1.000                                                        | 0.586 / 0.791                                                                     | 0.469/0.603                                                                        |
| Refinement                              |                                                                    |                                                                                   |                                                                                    |
| No. of Observed Data                    | 6539                                                               | 4002                                                                              | 12805                                                                              |
| No. of Parameters                       | 373                                                                | 214                                                                               | 882                                                                                |
| R1 <sup>a</sup> , wR2 <sup>b</sup>      | 0.0580, 0.0987                                                     | 0.00511, 0.1478                                                                   | 0.0337, 0.0835                                                                     |
| Goodness of Fit Indicator               | 0.987                                                              | 1.069                                                                             | 1.029                                                                              |

$${}^aR1 = \sum ||F_o| - |F_c|| / \sum |F_o| \quad {}^b wR2 = [ \sum w ((F_o^2 - F_c^2)^2 / \sum w (F_o^2)^2 )^{1/2} \quad w = [ \sigma^2(F_o^2) ]^{-1}$$

CCDC #2087272 (PdCl<sub>2</sub>(AsPh<sub>3</sub>)<sub>2</sub>), 2087273 (PdCl<sub>2</sub>(**1a**)<sub>2</sub>), 2087274 (PdCl<sub>2</sub>(**1d**)<sub>2</sub>)

**Table S2.** Crystallographic Data of [PdCl<sub>2</sub>(ligand)<sub>2</sub>] (ligand =**1k**, **1m**).

|                                         | [PdCl <sub>2</sub> ( <b>1k</b> ) <sub>2</sub> ]                                    | [PdCl <sub>2</sub> ( <b>1m</b> ) <sub>2</sub> ]                    |
|-----------------------------------------|------------------------------------------------------------------------------------|--------------------------------------------------------------------|
| Crystal data                            |                                                                                    |                                                                    |
| Empirical Formula                       | C <sub>48</sub> H <sub>54</sub> As <sub>2</sub> Cl <sub>2</sub> O <sub>12</sub> Pd | C <sub>36</sub> H <sub>66</sub> As <sub>2</sub> Cl <sub>2</sub> Pd |
| Formula Weight                          | 1150.10                                                                            | 857.50                                                             |
| Crystal Dimension, mm <sup>3</sup>      | 0.470 × 0.380 × 0.200                                                              | 0.55 × 0.4 × 0.24                                                  |
| Crystal System                          | monoclinic                                                                         | triclinic                                                          |
| Space Group                             | <i>P</i> 2 <sub>1</sub> / <i>n</i>                                                 | <i>P</i> -1                                                        |
| a, Å                                    | 12.720(2)                                                                          | 9.8187(6)                                                          |
| b, Å                                    | 22.095(4)                                                                          | 10.2351(7)                                                         |
| c, Å                                    | 18.916(4)                                                                          | 10.768(1)                                                          |
| α, deg                                  | -                                                                                  | 112.662(7)                                                         |
| β, deg                                  | 100.01(1)                                                                          | 107.773(6)                                                         |
| γ, deg                                  | -                                                                                  | 91.967(5)                                                          |
| Volume, Å <sup>3</sup>                  | 5235(2)                                                                            | 936.6(1)                                                           |
| D <sub>calcd</sub> , g cm <sup>-3</sup> | 1.459                                                                              | 1.464                                                              |
| Z                                       | 4                                                                                  | 1                                                                  |
| F(000)                                  | 2336.00                                                                            | 428.0                                                              |
| Data Collection                         |                                                                                    |                                                                    |
| Temperature, deg                        | 25.0                                                                               | -180.0                                                             |
| 2θ <sub>max</sub> , deg                 | 54.9                                                                               | 52.740                                                             |
| T <sub>min</sub> /T <sub>max</sub>      | 0.349/0.702                                                                        | 0.399/0.612                                                        |
| Refinement                              |                                                                                    |                                                                    |
| No. of Observed Data                    | 11573                                                                              | 3830                                                               |
| No. of Parameters                       | 586                                                                                | 187                                                                |
| R1 <sup>a</sup> , wR2 <sup>b</sup>      | 0.0587, 0.2223                                                                     | 0.0236, 0.0531                                                     |
| Goodness of Fit Indicator               | 1.108                                                                              | 1.047                                                              |

$${}^aR1 = \sum | |Fo| - |Fc| | / \sum |Fo| \quad {}^bwR2 = [ \sum w ((Fo^2 - Fc^2)^2 / \sum w (Fo^2)^2 )^{1/2} \quad w = [ \sigma^2(Fo^2) ]^{-1}$$

CCDC #2087275 (PdCl<sub>2</sub>(**1k**)<sub>2</sub>), 2087271 (PdCl<sub>2</sub>(**1m**)<sub>2</sub>)

**Table S3.** ORTEP drawing (ellipsoids at 50% probability), selected distances (Å), and angles (deg) of [PdCl<sub>2</sub>(AsPh<sub>3</sub>)<sub>2</sub>]. Hydrogen atoms were omitted for clarity.

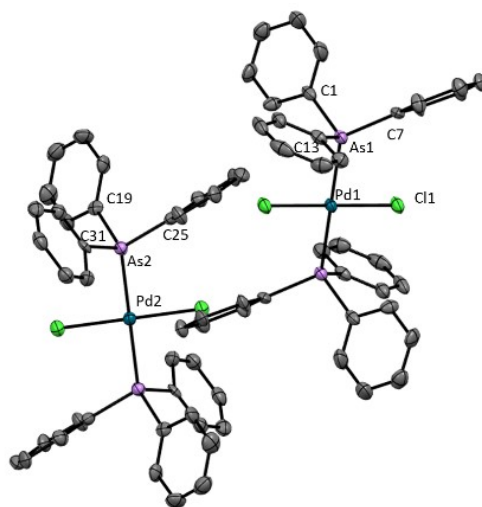

| A       | Bond length (Å) |             | Angle (deg) |
|---------|-----------------|-------------|-------------|
| As1-Pd1 | 2.4272(9)       | As1-Pd1-Cl1 | 86.60(6)    |
| Pd1-Cl1 | 2.289(2)        | C1-As1-C7   | 104.1(3)    |
| As1-C1  | 1.927(8)        | C7-As1-C13  | 106.9(3)    |
| As1-C7  | 1.943(8)        | C13-As1-C1  | 104.1(3)    |
| As1-C13 | 1.934(7)        |             |             |

  

| B       | Bond length (Å) |             | Angle (deg) |
|---------|-----------------|-------------|-------------|
| As2-Pd2 | 2.4178(8)       | As2-Pd2-Cl2 | 89.10(5)    |
| Pd2-Cl2 | 2.302(2)        | C19-As2-C25 | 103.2(3)    |
| As2-C19 | 1.922(8)        | C25-As2-C31 | 101.2(3)    |
| As2-C25 | 1.954(8)        | C31-As2-C19 | 103.7(3)    |
| As2-C31 | 1.933(7)        |             |             |

**Table S4.** ORTEP drawing (ellipsoids at 50% probability), selected distances (Å), and angles (deg) of [PdCl<sub>2</sub>(**1a**)<sub>2</sub>]. Hydrogen atoms were omitted for clarity.

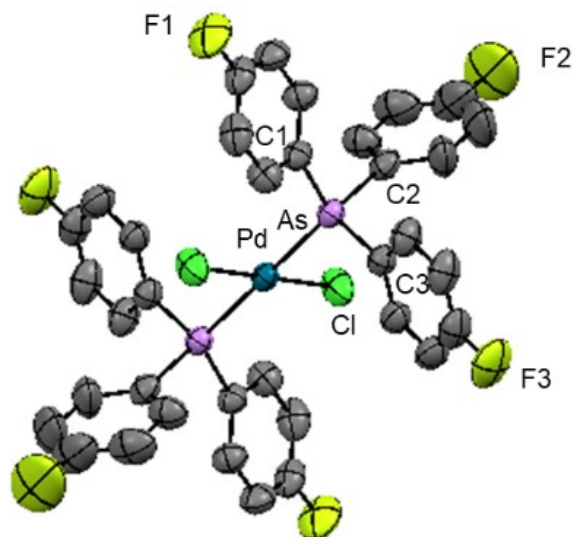

|       | Bond length (Å) |          | Angle (deg) |
|-------|-----------------|----------|-------------|
| As-Pd | 2.416(1)        | As-Pd-Cl | 88.67(5)    |
| Pd-Cl | 2.283(2)        | C1-As-C2 | 102.3(2)    |
| As-C1 | 1.935(5)        | C2-As-C3 | 105.1(2)    |
| As-C2 | 1.957(5)        | C3-As-C1 | 103.8(2)    |
| As-C3 | 1.926(5)        |          |             |

**Table S5.** ORTEP drawing (ellipsoids at 50% probability), selected distances (Å), and angles (deg) of  $[\text{PdCl}_2(\mathbf{1d})_2]$ . Hydrogen atoms were omitted for clarity.

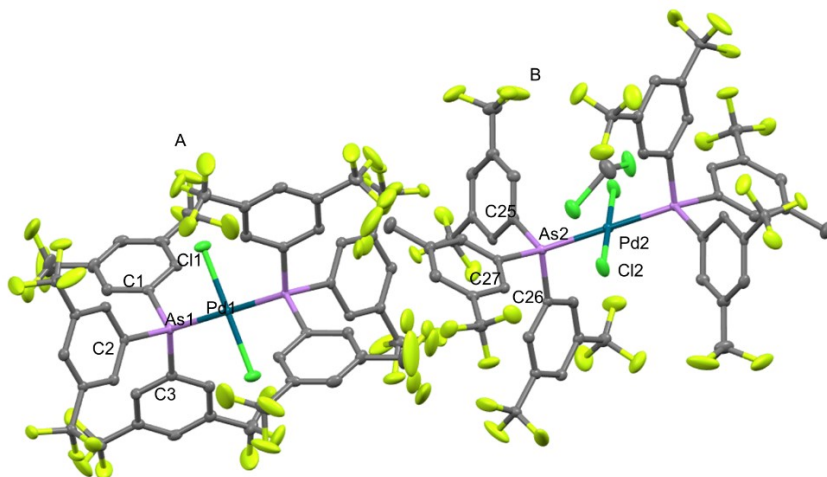

| A       | Bond length (Å) |             | Angle (deg) |
|---------|-----------------|-------------|-------------|
| As1-Pd1 | 2.3989(7)       | As1-Pd1-Cl1 | 92.60(3)    |
| Pd1-Cl1 | 2.289(1)        | C1-As1-C2   | 104.0(1)    |
| As1-C1  | 1.946(2)        | C2-As1-C3   | 105.3(1)    |
| As1-C2  | 1.937(2)        | C3-As1-C1   | 97.4(1)     |
| As1-C3  | 1.948(3)        |             |             |
| B       | Bond length (Å) |             | Angle (deg) |
| As2-Pd2 | 2.4342(7)       | As2-Pd2-Cl2 | 88.87(3)    |
| Pd2-Cl2 | 2.286(1)        | C25-As2-C26 | 100.3(1)    |
| As2-C25 | 1.951(2)        | C26-As2-C27 | 103.7(1)    |
| As2-C26 | 1.950(3)        | C27-As2-C25 | 102.0(1)    |
| As2-C27 | 1.956(2)        |             |             |



**Table S6.** ORTEP drawing (ellipsoids at 50% probability), selected distances (Å), and angles (deg) of  $[\text{PdCl}_2(\mathbf{1k})_2]$ . Hydrogen atoms were omitted for clarity.

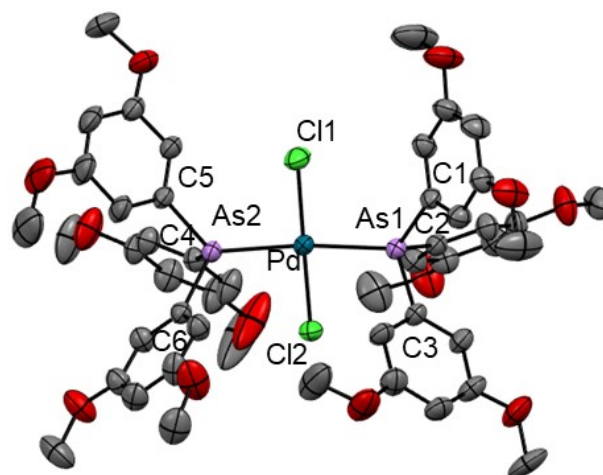

|        | Bond length (Å) |            | Angle (deg) |
|--------|-----------------|------------|-------------|
| As1-Pd | 2.4282(7)       | As1-Pd-Cl1 | 93.51(4)    |
| Pd-Cl1 | 2.295(2)        | C1-As1-C2  | 103.5(2)    |
| As1-C1 | 1.958(5)        | C2-As1-C3  | 104.9(2)    |
| As1-C2 | 1.944(5)        | C3-As1-C1  | 101.8(2)    |
| As1-C3 | 1.937(5)        | As2-Pd-Cl2 | 87.41(4)    |
| As2-Pd | 2.4248(7)       | C4-As2-C5  | 101.3(2)    |
| Pd-Cl2 | 2.303(1)        | C5-As2-C6  | 101.8(2)    |
| As2-C4 | 1.941(6)        | C6-As2-C4  | 103.2(2)    |
| As2-C5 | 1.947(5)        |            |             |
| As2-C6 | 1.938(5)        |            |             |

**Table S7.** ORTEP drawing (ellipsoids at 50% probability), selected distances (Å), and angles (deg) of [PdCl<sub>2</sub>(**1m**)<sub>2</sub>].

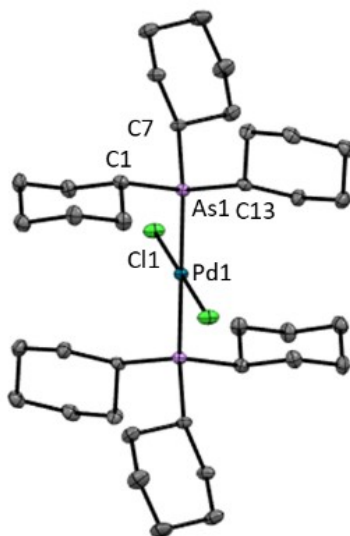

|         | Bond length (Å) |             | Angle (deg) |
|---------|-----------------|-------------|-------------|
| As1-Pd1 | 2.4286(3)       | As1-Pd1-Cl1 | 88.65(2)    |
| Pd1-Cl1 | 2.3088(5)       | C1-As1-C7   | 103.00(9)   |
| As1-C1  | 1.970(2)        | C7-As1-C13  | 102.97(9)   |
| As1-C7  | 1.979(2)        | C1-As1-C13  | 109.93(9)   |
| As1-C13 | 1.979(2)        |             |             |

## 4. DFT calculations

Without dispersion correction

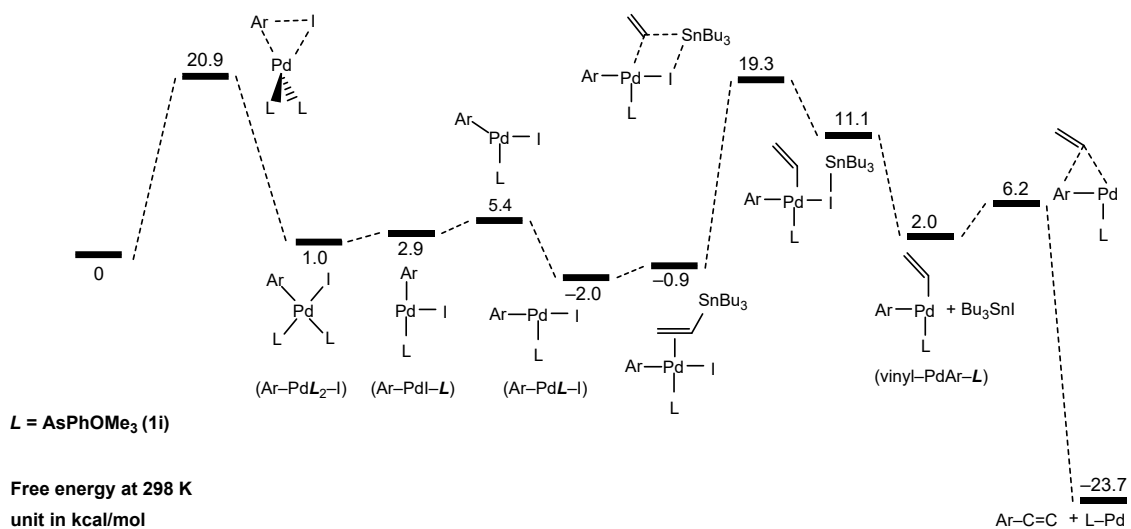

**Figure S20.** Energy profile for the Stille coupling reactions of *p*-iodoanisole and vinylSnBu<sub>3</sub> in the presence of PdL<sub>2</sub> (L = AsPhOMe<sub>3</sub> (**1i**), ArX = *p*-iodoanisole), obtained from B3LYP calculations without dispersion correction. Changes of Gibbs free energy at 298 K during the reactions are displayed, measured with reference to PdL<sub>2</sub>, *p*-iodoanisole, and vinylSnBu<sub>3</sub>. Structures Pd-complexes changed in each step are only given.

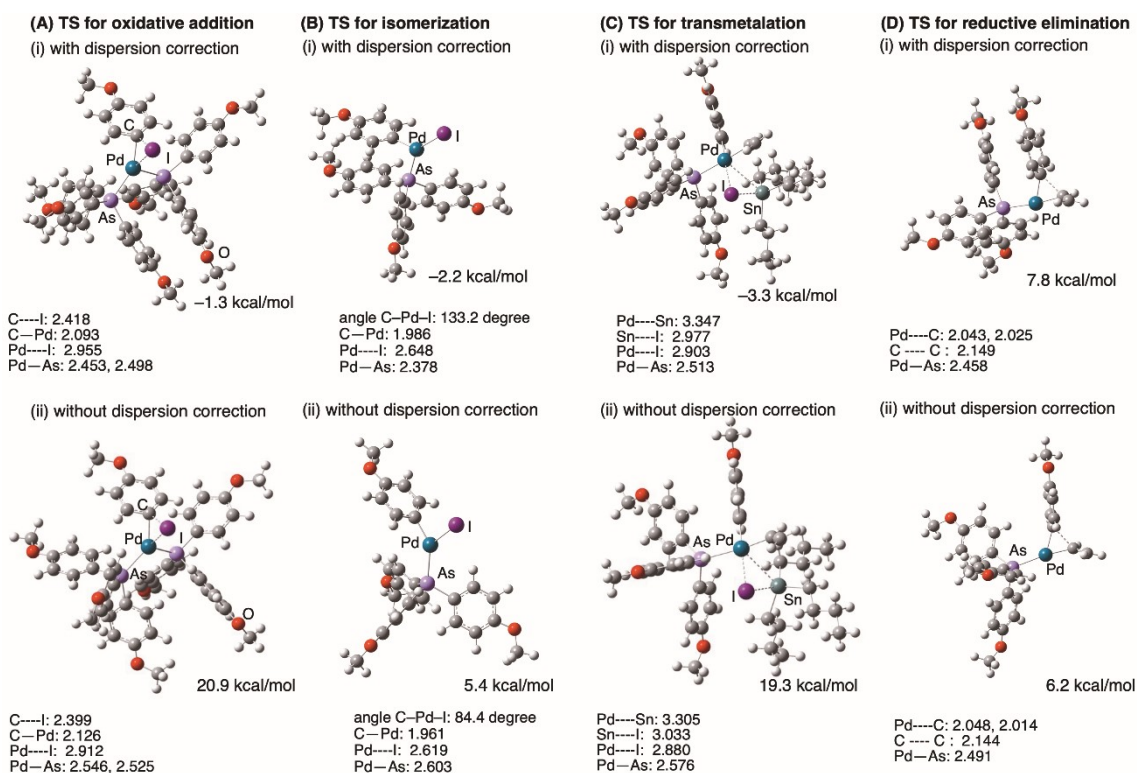

**Figure S21.** Optimized transition states for the oxidative addition, isomerization, transmetalation, and reductive elimination processes, obtained from B3LYP calculations with and without dispersion corrections, are displayed at the top and bottom, respectively.

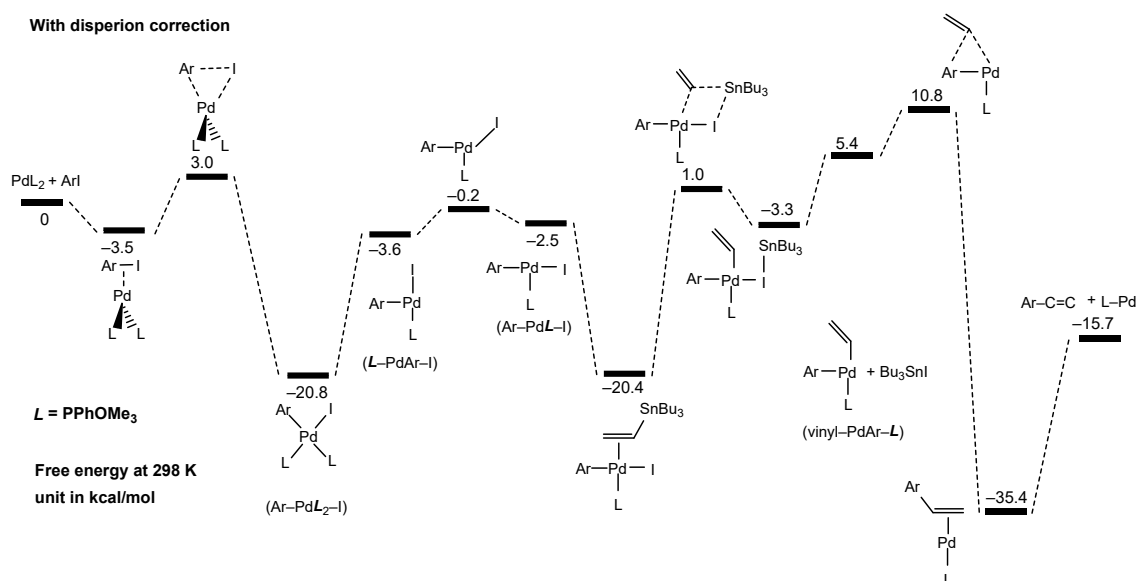

**Figure S22.** Energy profile for the Stille coupling reactions of *p*-iodoanisole and vinylSnBu<sub>3</sub> in the presence of PdL<sub>2</sub> (L = PPhOMe<sub>3</sub>, ArX = *p*-iodoanisole), obtained from dispersion-corrected B3LYP calculations with dispersion correction (B3LYP-GD3). Changes of Gibbs free energy at 298 K during the reactions are displayed, measured with reference to PdL<sub>2</sub>, *p*-iodoanisole, and vinylSnBu<sub>3</sub>. Structures Pd-complexes changed in each step are only given.

**Cartesian Coordinates of Optimized geometries together with energy values obtained from DFT calculations.**

**(1) Optimized geometries in Figure 2, obtained from dispersion-corrected B3LYP (B3LYP-GD3) calculations**

***L* = As(PhOMe)<sub>3</sub> [1i]**

(A) PdL<sub>2</sub>

Total energy: -6671.98667117 Hartree

Free energy: -6671.342399 Hartree

|    |            |             |             |
|----|------------|-------------|-------------|
| Pd | 0.00000000 | 0.00008200  | -0.00001800 |
| As | 2.38317500 | -0.00048500 | -0.00056800 |
| C  | 3.25777400 | 1.09545500  | -1.35749100 |
| C  | 4.48150400 | 1.73686900  | -1.15530100 |
| C  | 2.62234800 | 1.23716500  | -2.60242400 |
| C  | 5.07601800 | 2.49885200  | -2.16619800 |
| H  | 4.98419800 | 1.65691200  | -0.19590200 |
| C  | 3.20226900 | 1.98553300  | -3.61739400 |
| H  | 1.65747900 | 0.76334500  | -2.76609400 |
| C  | 4.43566200 | 2.62159400  | -3.40528500 |
| H  | 6.02359500 | 2.98821900  | -1.97430800 |
| H  | 2.71912200 | 2.10352400  | -4.58192200 |
| C  | 3.25405200 | -1.72518900 | -0.27230000 |
| C  | 2.61458900 | -2.87343300 | 0.22403100  |
| C  | 4.47906400 | -1.87272800 | -0.92603600 |
| C  | 3.19194900 | -4.12776800 | 0.08305700  |
| H  | 1.64861400 | -2.77661600 | 0.71377200  |
| C  | 5.07110800 | -3.13029400 | -1.08068400 |
| H  | 4.98476400 | -1.00242800 | -1.33394900 |
| C  | 4.42681100 | -4.26400900 | -0.57066900 |
| H  | 2.70572100 | -5.02149700 | 0.46055000  |
| H  | 6.01987400 | -3.21022500 | -1.59804000 |
| C  | 3.25776600 | 0.62545100  | 1.62746300  |
| C  | 2.62459600 | 1.63560400  | 2.37073400  |
| C  | 4.47970400 | 0.12688700  | 2.08352500  |
| C  | 3.20496400 | 2.14033100  | 3.52614000  |
| H  | 1.66113500 | 2.01666400  | 2.04081600  |

|    |             |             |             |
|----|-------------|-------------|-------------|
| C  | 5.07462300  | 0.62120300  | 3.24872200  |
| H  | 4.98077600  | -0.66586300 | 1.53582800  |
| C  | 4.43656900  | 1.63573600  | 3.97265400  |
| H  | 2.72357800  | 2.91887900  | 4.10906400  |
| H  | 6.02080200  | 0.20812100  | 3.57783400  |
| As | -2.38317400 | 0.00054500  | 0.00055000  |
| C  | -3.25775900 | -0.62552100 | -1.62743400 |
| C  | -4.47972600 | -0.12703800 | -2.08350700 |
| C  | -2.62455300 | -1.63568700 | -2.37065600 |
| C  | -5.07463900 | -0.62144800 | -3.24866700 |
| H  | -4.98082600 | 0.66571900  | -1.53584700 |
| C  | -3.20491400 | -2.14050500 | -3.52602600 |
| H  | -1.66106900 | -2.01668200 | -2.04073200 |
| C  | -4.43654900 | -1.63599200 | -3.97255100 |
| H  | -6.02084100 | -0.20842700 | -3.57779000 |
| H  | -2.72350000 | -2.91906300 | -4.10891400 |
| C  | -3.25770500 | -1.09536100 | 1.35754600  |
| C  | -4.48141400 | -1.73683200 | 1.15541100  |
| C  | -2.62225100 | -1.23698600 | 2.60247400  |
| C  | -5.07588000 | -2.49878900 | 2.16635600  |
| H  | -4.98413000 | -1.65694200 | 0.19601700  |
| C  | -3.20212300 | -1.98532800 | 3.61749100  |
| H  | -1.65739600 | -0.76312200 | 2.76610200  |
| C  | -4.43549600 | -2.62144700 | 3.40543600  |
| H  | -6.02344200 | -2.98820200 | 1.97450700  |
| H  | -2.71895300 | -2.10325400 | 4.58201500  |
| C  | -3.25412600 | 1.72522400  | 0.27219800  |
| C  | -4.47913800 | 1.87274300  | 0.92593900  |
| C  | -2.61472000 | 2.87346900  | -0.22420200 |
| C  | -5.07123700 | 3.13029100  | 1.08052500  |
| H  | -4.98479400 | 1.00244300  | 1.33390500  |
| C  | -3.19213500 | 4.12778600  | -0.08329000 |
| H  | -1.64874500 | 2.77667000  | -0.71394800 |
| C  | -4.42699700 | 4.26400800  | 0.57044100  |
| H  | -6.02000100 | 3.21020700  | 1.59788600  |
| H  | -2.70595000 | 5.02151700  | -0.46083600 |

|   |             |             |             |
|---|-------------|-------------|-------------|
| O | -4.92035900 | -2.19378300 | -5.12006200 |
| O | -4.90751000 | 5.53784100  | 0.66208800  |
| O | -4.91842100 | -3.33700300 | 4.46220200  |
| O | 4.90726800  | -5.53786000 | -0.66238000 |
| O | 4.92038900  | 2.19344100  | 5.12020300  |
| O | 4.91863600  | 3.33718300  | -4.46200700 |
| C | 6.15283700  | 4.01888400  | -4.30387500 |
| H | 6.34416100  | 4.52176800  | -5.25332800 |
| H | 6.10346800  | 4.76832500  | -3.50259600 |
| H | 6.97701200  | 3.32437700  | -4.09198300 |
| C | 6.15339100  | 1.71351800  | 5.63242400  |
| H | 6.34605300  | 2.28544300  | 6.54167700  |
| H | 6.10144300  | 0.64542700  | 5.88268800  |
| H | 6.97796700  | 1.87403700  | 4.92474400  |
| C | 6.14363900  | -5.74338100 | -1.32733300 |
| H | 6.33275700  | -6.81748000 | -1.28855500 |
| H | 6.09897200  | -5.42296700 | -2.37685200 |
| H | 6.96690000  | -5.21473400 | -0.82805800 |
| C | -6.15259800 | -4.01876000 | 4.30412600  |
| H | -6.10321600 | -4.76823700 | 3.50288200  |
| H | -6.34388500 | -4.52160700 | 5.25360600  |
| H | -6.97680500 | -3.32429600 | 4.09221600  |
| C | -6.15339500 | -1.71395300 | -5.63228800 |
| H | -6.10150500 | -0.64587300 | -5.88261500 |
| H | -6.34604500 | -2.28594100 | -6.54150300 |
| H | -6.97794900 | -1.87447100 | -4.92458200 |
| C | -6.14388300 | 5.74334300  | 1.32704100  |
| H | -6.09919200 | 5.42298900  | 2.37657800  |
| H | -6.33305200 | 6.81743100  | 1.28820700  |
| H | -6.96712600 | 5.21463100  | 0.82780400  |

(B) Ar-X (p-iodoanisole)

Total energy: -357.597015771 Hartree

Free energy: -357.509312 Hartree

|   |             |            |             |
|---|-------------|------------|-------------|
| C | -0.18178900 | 0.07494400 | -0.00004200 |
| C | 0.42030200  | 1.33595900 | 0.00006800  |



|   |             |             |             |
|---|-------------|-------------|-------------|
| C | 0.59028000  | -1.08125500 | -0.00007200 |
| C | 1.80714300  | 1.42998400  | 0.00015100  |
| H | -0.18127100 | 2.23785400  | 0.00009300  |
| C | 1.98613200  | -0.98617600 | 0.00000700  |
| H | 0.12322800  | -2.05971500 | -0.00016300 |
| C | 2.59945000  | 0.27218900  | 0.00012100  |
| H | 2.30092000  | 2.39599700  | 0.00024000  |
| H | 2.57226600  | -1.89712000 | -0.00003800 |
| I | -2.33310700 | -0.07703900 | -0.00014800 |
| O | 3.94583800  | 0.48088100  | 0.00018500  |
| C | 4.80233000  | -0.65191200 | 0.00051000  |
| H | 5.82048300  | -0.25991100 | 0.00076800  |
| H | 4.65436900  | -1.27166800 | 0.89491100  |
| H | 4.65488400  | -1.27179300 | -0.89389200 |

(C) the first complex between Ar-X and PdL<sub>2</sub>

Total energy: -7029.62474316 Hartree

Free energy: -7028.862760 Hartree

|    |             |             |             |
|----|-------------|-------------|-------------|
| Pd | -0.00883300 | -1.08973100 | -0.60581900 |
| As | 1.89898100  | 0.26590400  | 0.14111000  |
| C  | 1.93393400  | 0.61030000  | 2.06295800  |
| C  | 3.08011300  | 1.02866900  | 2.74475000  |
| C  | 0.75091900  | 0.42826900  | 2.79819300  |
| C  | 3.05384900  | 1.28752500  | 4.11808300  |
| H  | 4.01763200  | 1.14211600  | 2.20795600  |
| C  | 0.70580200  | 0.68449400  | 4.16229300  |
| H  | -0.14332700 | 0.06961000  | 2.30112100  |
| C  | 1.85897000  | 1.12127400  | 4.83154100  |
| H  | 3.96189800  | 1.60854200  | 4.61475800  |
| H  | -0.20914100 | 0.54422800  | 4.72888800  |
| C  | 1.87458000  | 2.06785900  | -0.61351300 |
| C  | 1.18068600  | 2.25456800  | -1.82013400 |
| C  | 2.43840000  | 3.18240500  | 0.00962800  |
| C  | 1.04608600  | 3.51733000  | -2.37946700 |
| H  | 0.71004900  | 1.40148200  | -2.30177300 |
| C  | 2.30065200  | 4.46239100  | -0.53349700 |

|    |             |             |             |
|----|-------------|-------------|-------------|
| H  | 2.96748800  | 3.07067800  | 0.95110500  |
| C  | 1.59165600  | 4.63247200  | -1.72926200 |
| H  | 0.48740800  | 3.67306400  | -3.29593300 |
| H  | 2.72713600  | 5.31030300  | -0.01103200 |
| C  | 3.74922600  | -0.27513100 | -0.15319100 |
| C  | 4.25121900  | -1.38304000 | 0.55083300  |
| C  | 4.55860600  | 0.32220700  | -1.11938900 |
| C  | 5.52191000  | -1.87625000 | 0.29465200  |
| H  | 3.64028300  | -1.86125900 | 1.31201600  |
| C  | 5.83888300  | -0.16817000 | -1.39603900 |
| H  | 4.19443100  | 1.18173600  | -1.67441500 |
| C  | 6.32377400  | -1.27419600 | -0.68848200 |
| H  | 5.91936000  | -2.72982900 | 0.83417400  |
| As | -2.04627600 | 0.22136600  | -0.28123800 |
| C  | -3.59937100 | -0.15834100 | -1.40097000 |
| C  | -4.90690400 | 0.16030200  | -1.02587100 |
| C  | -3.39066300 | -0.78945100 | -2.63686900 |
| C  | -5.99070000 | -0.13756700 | -1.85470900 |
| H  | -5.09602600 | 0.63846300  | -0.06912400 |
| C  | -4.45700400 | -1.08835500 | -3.47645500 |
| H  | -2.37911600 | -1.05360200 | -2.93461700 |
| C  | -5.76572700 | -0.76413200 | -3.08875500 |
| H  | -6.99301900 | 0.11802100  | -1.53186800 |
| H  | -4.30679000 | -1.57623300 | -4.43410400 |
| C  | -2.75405400 | -0.07198800 | 1.51573500  |
| C  | -2.48307300 | -1.30182800 | 2.12425200  |
| C  | -3.48660600 | 0.88337400  | 2.23691300  |
| C  | -2.92962400 | -1.59402600 | 3.41416100  |
| H  | -1.89536300 | -2.04388200 | 1.59559900  |
| C  | -3.93547800 | 0.61045500  | 3.52396500  |
| H  | -3.68718200 | 1.85718600  | 1.80006600  |
| C  | -3.66183000 | -0.63075400 | 4.12108000  |
| H  | -2.69066300 | -2.55967800 | 3.84344500  |
| H  | -4.49532100 | 1.34397800  | 4.09532500  |
| C  | -1.98269000 | 2.17128200  | -0.34589200 |
| C  | -2.54548400 | 2.90296100  | -1.39199900 |

|   |             |             |             |
|---|-------------|-------------|-------------|
| C | -1.21472700 | 2.85507800  | 0.61341600  |
| C | -2.33596700 | 4.28165400  | -1.50711300 |
| H | -3.14753500 | 2.39997000  | -2.14321400 |
| C | -1.01473400 | 4.22337300  | 0.52203500  |
| H | -0.75314300 | 2.31206600  | 1.43253800  |
| C | -1.55925000 | 4.94377200  | -0.55114500 |
| H | -2.77091900 | 4.81599500  | -2.34323900 |
| H | -0.40707800 | 4.75281000  | 1.24745100  |
| C | 0.72118600  | -3.14281400 | -0.97069100 |
| C | -0.66253500 | -3.19793500 | -1.31901000 |
| C | 1.14391200  | -3.73682800 | 0.26047000  |
| C | -1.59181900 | -3.82486800 | -0.43151700 |
| H | -0.97355600 | -3.01887800 | -2.34221600 |
| C | 0.22049400  | -4.27920500 | 1.12269700  |
| H | 2.19777900  | -3.73168000 | 0.51529300  |
| C | -1.16072000 | -4.31792900 | 0.78301900  |
| H | -2.63216300 | -3.86313000 | -0.73039200 |
| H | 0.52356400  | -4.68626700 | 2.08199600  |
| O | -1.26542700 | 6.27874800  | -0.57472500 |
| O | -4.14324300 | -0.79651900 | 5.38553100  |
| O | -6.74424400 | -1.10205800 | -3.97618500 |
| O | -1.97334200 | -4.84945500 | 1.75369000  |
| O | 1.71705500  | 1.34449000  | 6.16986100  |
| O | 1.36401700  | 5.83739000  | -2.33177300 |
| C | -8.09103600 | -0.80489300 | -3.64023400 |
| H | -8.24850500 | 0.27398700  | -3.50896000 |
| H | -8.69529800 | -1.15554500 | -4.47844600 |
| H | -8.40610600 | -1.32555000 | -2.72611600 |
| C | -3.86292100 | -2.01840100 | 6.05316300  |
| H | -2.78286500 | -2.17719500 | 6.17024200  |
| H | -4.32353300 | -1.93611700 | 7.03889800  |
| H | -4.29420600 | -2.87846300 | 5.52387400  |
| C | -1.64225400 | 7.02005300  | -1.72701400 |
| H | -2.73218700 | 7.04936500  | -1.85432400 |
| H | -1.27828300 | 8.03581300  | -1.56236300 |
| H | -1.17234100 | 6.60811700  | -2.62804300 |

|   |             |             |             |
|---|-------------|-------------|-------------|
| C | 2.85143600  | 1.77917700  | 6.90331700  |
| H | 2.51717600  | 1.89583100  | 7.93558000  |
| H | 3.66474100  | 1.04193700  | 6.86912600  |
| H | 3.22832400  | 2.74310100  | 6.53583300  |
| C | 1.75424600  | 7.01337100  | -1.63565500 |
| H | 1.44895200  | 7.85009700  | -2.26660100 |
| H | 1.24320800  | 7.08232100  | -0.66800100 |
| H | 2.84111600  | 7.05758900  | -1.48823400 |
| C | -3.36797400 | -4.87796800 | 1.49335300  |
| H | -3.60523200 | -5.50019200 | 0.61985000  |
| H | -3.83393300 | -5.31325400 | 2.37948900  |
| H | -3.76688600 | -3.86703500 | 1.33448800  |
| I | 2.22245800  | -3.11207800 | -2.60431800 |
| H | 6.44008000  | 0.31864000  | -2.15479900 |
| O | 7.55486800  | -1.83544700 | -0.86858900 |
| C | 8.39332300  | -1.30093200 | -1.88035100 |
| H | 7.92632300  | -1.36899400 | -2.87197900 |
| H | 8.65522900  | -0.25285200 | -1.68095300 |
| H | 9.30256600  | -1.90444100 | -1.86975000 |

(D)The transition state for the oxidative addition by PdL<sub>2</sub>

imaginary mode 91.77 i cm<sup>-1</sup>

Total energy: -7029.61510355 Hartree

Free energy: -7028.853721 Hartree

|    |            |             |             |
|----|------------|-------------|-------------|
| Pd | 0.06928800 | -1.13773500 | -0.60576500 |
| As | 1.80860600 | 0.50833000  | 0.10690100  |
| C  | 1.95140400 | 0.85893900  | 2.02252400  |
| C  | 3.03756700 | 1.50982700  | 2.61527600  |
| C  | 0.89795000 | 0.43652900  | 2.84910300  |
| C  | 3.07195400 | 1.75854900  | 3.99032600  |
| H  | 3.88357000 | 1.81645700  | 2.00699800  |
| C  | 0.91161600 | 0.68106300  | 4.21595800  |
| H  | 0.06007100 | -0.09911700 | 2.41841000  |
| C  | 2.00043700 | 1.34903200  | 4.79602000  |
| H  | 3.93139400 | 2.26254100  | 4.41650000  |
| H  | 0.09381200 | 0.35639700  | 4.85127000  |

|    |             |             |             |
|----|-------------|-------------|-------------|
| C  | 1.40995800  | 2.27877600  | -0.62325500 |
| C  | 0.61399500  | 2.34151400  | -1.77875800 |
| C  | 1.82099300  | 3.47417500  | -0.03110300 |
| C  | 0.23372700  | 3.56337100  | -2.31684300 |
| H  | 0.26639100  | 1.42225400  | -2.24185900 |
| C  | 1.43561800  | 4.71101200  | -0.55341100 |
| H  | 2.42366100  | 3.45765900  | 0.87150000  |
| C  | 0.62890500  | 4.75622000  | -1.69734500 |
| H  | -0.40093900 | 3.61912600  | -3.19468000 |
| H  | 1.75019400  | 5.61985200  | -0.05454100 |
| C  | 3.68945400  | 0.30853600  | -0.37446800 |
| C  | 4.52663500  | -0.53384100 | 0.37815300  |
| C  | 4.18826700  | 0.85236900  | -1.56047000 |
| C  | 5.82067100  | -0.81396800 | -0.03967600 |
| H  | 4.16008200  | -0.97794200 | 1.29921900  |
| C  | 5.48642300  | 0.57358400  | -1.99853000 |
| H  | 3.56036000  | 1.50261400  | -2.16279000 |
| C  | 6.30895700  | -0.26452000 | -1.23588800 |
| H  | 6.47470200  | -1.46002600 | 0.53717300  |
| As | -2.10811800 | -0.24949600 | 0.09269200  |
| C  | -3.68276500 | -0.86764000 | -0.87558000 |
| C  | -4.97959700 | -0.72881700 | -0.37471500 |
| C  | -3.50416200 | -1.46587000 | -2.13295200 |
| C  | -6.08589100 | -1.17358700 | -1.10129300 |
| H  | -5.14124800 | -0.27802900 | 0.60019600  |
| C  | -4.59623100 | -1.90731900 | -2.87058400 |
| H  | -2.50094500 | -1.58673300 | -2.53399500 |
| C  | -5.89428900 | -1.76433200 | -2.35849100 |
| H  | -7.07860800 | -1.05749100 | -0.68276600 |
| H  | -4.47077100 | -2.37017700 | -3.84400100 |
| C  | -2.56656600 | -0.61542900 | 1.95326700  |
| C  | -2.02518900 | -1.75989600 | 2.54702200  |
| C  | -3.36086400 | 0.23468900  | 2.73862400  |
| C  | -2.26130600 | -2.06382000 | 3.88996700  |
| H  | -1.38297500 | -2.41351600 | 1.96054700  |
| C  | -3.60542600 | -0.05332600 | 4.07531900  |

|   |             |             |             |
|---|-------------|-------------|-------------|
| H | -3.77008500 | 1.14398400  | 2.30885700  |
| C | -3.05599200 | -1.20478100 | 4.66094400  |
| H | -1.81697200 | -2.95370900 | 4.31940300  |
| H | -4.21062800 | 0.60090700  | 4.69455900  |
| C | -2.34545400 | 1.68577600  | 0.01949100  |
| C | -3.10063100 | 2.29995300  | -0.98004800 |
| C | -1.62368100 | 2.49904500  | 0.91064400  |
| C | -3.12777300 | 3.69199300  | -1.11515200 |
| H | -3.67011100 | 1.69436100  | -1.67883500 |
| C | -1.65631000 | 3.88019100  | 0.79936300  |
| H | -1.01738900 | 2.05066700  | 1.69180000  |
| C | -2.39543500 | 4.48604000  | -0.22703400 |
| H | -3.70819200 | 4.13529000  | -1.91531300 |
| H | -1.08606100 | 4.51227700  | 1.47089400  |
| C | 1.16684900  | -2.74545300 | -1.37364600 |
| C | 0.24483900  | -3.71071100 | -0.92790400 |
| C | 2.54626800  | -2.90117000 | -1.11654200 |
| C | 0.68624100  | -4.74563500 | -0.07588600 |
| H | -0.78052500 | -3.70646500 | -1.27895600 |
| C | 2.96507500  | -3.92573200 | -0.29116300 |
| H | 3.25728100  | -2.18832700 | -1.51482600 |
| C | 2.03656200  | -4.84422900 | 0.24920600  |
| H | -0.03444600 | -5.47588800 | 0.27274000  |
| H | 4.01281500  | -4.03435200 | -0.02934900 |
| O | -2.32678400 | 5.85037700  | -0.27739100 |
| O | -3.34619900 | -1.39047300 | 5.97982000  |
| O | -6.89774800 | -2.23204800 | -3.15492300 |
| O | 2.58071000  | -5.81026000 | 1.05111800  |
| O | 1.92661900  | 1.54046100  | 6.14456200  |
| O | 0.16506100  | 5.90485400  | -2.27432400 |
| C | -8.23423400 | -2.12006400 | -2.69102800 |
| H | -8.52299500 | -1.07241900 | -2.53195000 |
| H | -8.86216500 | -2.54943200 | -3.47344200 |
| H | -8.38892200 | -2.67836600 | -1.75804900 |
| C | -2.78579600 | -2.51598800 | 6.63962500  |
| H | -1.68811300 | -2.48898700 | 6.62452300  |

|   |             |             |             |
|---|-------------|-------------|-------------|
| H | -3.13188000 | -2.46279700 | 7.67306500  |
| H | -3.12668600 | -3.45974600 | 6.19357100  |
| C | -2.92352700 | 6.50388100  | -1.38951000 |
| H | -4.00967000 | 6.34779500  | -1.41873000 |
| H | -2.72262700 | 7.56818400  | -1.25460900 |
| H | -2.47197100 | 6.16693100  | -2.33003600 |
| C | 3.00106000  | 2.20648600  | 6.78959300  |
| H | 2.73553800  | 2.25426600  | 7.84699100  |
| H | 3.94516100  | 1.65625200  | 6.67974000  |
| H | 3.13600400  | 3.22659500  | 6.40580700  |
| C | 0.40459000  | 7.13158100  | -1.59831800 |
| H | -0.07894300 | 7.90426900  | -2.19887300 |
| H | -0.03933500 | 7.11838600  | -0.59568300 |
| H | 1.47705700  | 7.35526600  | -1.52828000 |
| C | 1.70707300  | -6.76876100 | 1.62106700  |
| H | 1.20466500  | -7.37083900 | 0.85143100  |
| H | 2.32990000  | -7.42170600 | 2.23526800  |
| H | 0.94369000  | -6.29651500 | 2.25526500  |
| I | 0.57171800  | -1.68853300 | -3.46543000 |
| H | 5.83821000  | 1.01300400  | -2.92431100 |
| O | 7.58909600  | -0.60621400 | -1.56224100 |
| C | 8.12555000  | -0.11079700 | -2.77932900 |
| H | 7.54127000  | -0.44626200 | -3.64643300 |
| H | 8.17487400  | 0.98643500  | -2.78523500 |
| H | 9.13690200  | -0.51462600 | -2.85011600 |

(E) Ar-PdL<sub>2</sub>-I

Total energy: -7029.66142412 Hartree

Free energy: -7028.892342 Hartree

|    |             |             |             |
|----|-------------|-------------|-------------|
| Pd | -0.62869200 | 1.33991600  | 0.00821400  |
| As | 1.83778500  | 0.72910200  | -0.11188700 |
| C  | 2.39474100  | -0.59850400 | 1.20944700  |
| C  | 3.20875200  | -1.70010500 | 0.93701000  |
| C  | 1.89432900  | -0.44478000 | 2.51321700  |
| C  | 3.48967900  | -2.65566400 | 1.91881800  |
| H  | 3.60422400  | -1.85100400 | -0.06172600 |

|    |             |             |             |
|----|-------------|-------------|-------------|
| C  | 2.18099100  | -1.37323400 | 3.50433300  |
| H  | 1.25221000  | 0.39840300  | 2.74871400  |
| C  | 2.96150500  | -2.49812300 | 3.20569200  |
| H  | 4.10502100  | -3.51064100 | 1.66485600  |
| H  | 1.77861800  | -1.27120500 | 4.50559700  |
| C  | 3.24429100  | 2.05967900  | 0.08785300  |
| C  | 3.24295800  | 3.17297200  | -0.76936500 |
| C  | 4.26818400  | 1.93353700  | 1.02567500  |
| C  | 4.24797700  | 4.12434900  | -0.69361000 |
| H  | 2.44192800  | 3.30455900  | -1.48942100 |
| C  | 5.28254700  | 2.89265800  | 1.12054100  |
| H  | 4.29016300  | 1.08364800  | 1.70014300  |
| C  | 5.27456600  | 3.99227200  | 0.25588900  |
| H  | 4.25491000  | 4.99091900  | -1.34619500 |
| H  | 6.06122800  | 2.76776100  | 1.86342400  |
| C  | 2.36977300  | -0.03589500 | -1.82216300 |
| C  | 1.39587200  | -0.31030500 | -2.79408500 |
| C  | 3.70665900  | -0.31618300 | -2.11984200 |
| C  | 1.74062100  | -0.89616000 | -4.00399000 |
| H  | 0.35571800  | -0.07678900 | -2.59398200 |
| C  | 4.06945700  | -0.92007700 | -3.32644500 |
| H  | 4.48504900  | -0.05508000 | -1.40832700 |
| C  | 3.07738200  | -1.22719600 | -4.26778100 |
| H  | 0.99085000  | -1.13402200 | -4.74998000 |
| As | -1.48009600 | -0.97858400 | -0.01063500 |
| C  | -1.26080200 | -1.68183700 | 1.78689700  |
| C  | -0.96325700 | -3.01962000 | 2.05470700  |
| C  | -1.37068200 | -0.78788300 | 2.86641600  |
| C  | -0.71735200 | -3.45633200 | 3.35845600  |
| H  | -0.88967700 | -3.73462000 | 1.24195000  |
| C  | -1.16491700 | -1.21560600 | 4.16871900  |
| H  | -1.57634400 | 0.26161400  | 2.68069900  |
| C  | -0.80045600 | -2.54760200 | 4.42061100  |
| H  | -0.44912300 | -4.49168700 | 3.52975200  |
| H  | -1.22618600 | -0.52736600 | 5.00534500  |
| C  | -3.37412200 | -1.19256700 | -0.36815400 |



|   |             |             |             |
|---|-------------|-------------|-------------|
| C | -3.90269000 | -0.61938300 | -1.52762400 |
| C | -4.25041500 | -1.77256200 | 0.55876200  |
| C | -5.27547300 | -0.58767100 | -1.75764500 |
| H | -3.24883100 | -0.12443800 | -2.23758900 |
| C | -5.62381800 | -1.73556500 | 0.34817700  |
| H | -3.86419900 | -2.22151700 | 1.46847300  |
| C | -6.14574000 | -1.11485800 | -0.79639900 |
| H | -5.64966000 | -0.09261700 | -2.64406300 |
| H | -6.31653100 | -2.15199000 | 1.07231400  |
| C | -0.66165700 | -2.33135500 | -1.15113500 |
| C | 0.60210700  | -2.83982700 | -0.83987400 |
| C | -1.23788800 | -2.68493100 | -2.38191000 |
| C | 1.30880500  | -3.63692600 | -1.73957900 |
| H | 1.06180300  | -2.60525800 | 0.11093000  |
| C | -0.54352800 | -3.47346400 | -3.28970700 |
| H | -2.23032600 | -2.33310800 | -2.64310900 |
| C | 0.75066300  | -3.92601300 | -2.98974000 |
| H | 2.29641800  | -3.98967300 | -1.46783900 |
| H | -0.97045100 | -3.73305800 | -4.25293800 |
| C | -2.57994700 | 1.94638700  | -0.09672600 |
| C | -3.52454600 | 1.73864400  | 0.90955200  |
| C | -3.02501600 | 2.51524600  | -1.30166500 |
| C | -4.88499800 | 2.00458500  | 0.71051300  |
| H | -3.22806500 | 1.32631400  | 1.86871900  |
| C | -4.37565500 | 2.78657300  | -1.51624700 |
| H | -2.31423600 | 2.74781900  | -2.08986300 |
| C | -5.31759200 | 2.50192300  | -0.52030400 |
| H | -5.58531100 | 1.78689200  | 1.50810300  |
| H | -4.72253500 | 3.20730600  | -2.45560400 |
| O | 1.37725200  | -4.62488700 | -3.97541600 |
| O | -7.50540900 | -1.04538900 | -0.87207700 |
| O | -0.52269700 | -2.84667500 | 5.71812800  |
| O | -6.63570800 | 2.72135300  | -0.85314900 |
| O | 3.13499500  | -3.38587800 | 4.23103600  |
| O | 6.21093000  | 4.98374400  | 0.25090200  |
| C | 0.09129600  | -4.10045400 | 5.99997600  |

|   |             |             |             |
|---|-------------|-------------|-------------|
| H | 1.02789700  | -4.21004700 | 5.43951000  |
| H | 0.30422300  | -4.09375200 | 7.07010700  |
| H | -0.57885300 | -4.94061400 | 5.77566700  |
| C | -8.07494800 | -0.34646500 | -1.97590400 |
| H | -7.85194100 | -0.84870100 | -2.92641500 |
| H | -9.15364600 | -0.35793000 | -1.81143600 |
| H | -7.71877400 | 0.68993300  | -2.01848000 |
| C | 2.75945900  | -4.90972600 | -3.81464400 |
| H | 2.93466700  | -5.63172100 | -3.00570600 |
| H | 3.08880100  | -5.34569800 | -4.75910300 |
| H | 3.33258300  | -3.99599500 | -3.61479500 |
| C | 3.92871100  | -4.53958900 | 3.99349500  |
| H | 3.94096800  | -5.09619000 | 4.93192500  |
| H | 3.49968100  | -5.17115600 | 3.20415400  |
| H | 4.95768900  | -4.27317200 | 3.71947500  |
| C | 7.24631900  | 4.93435500  | 1.21949600  |
| H | 7.85862800  | 5.82218800  | 1.05296000  |
| H | 6.84651000  | 4.95814000  | 2.24193500  |
| H | 7.87177400  | 4.03888400  | 1.10162500  |
| C | -7.61309800 | 2.47185700  | 0.14537000  |
| H | -7.44965200 | 3.09084100  | 1.03756700  |
| H | -8.57491200 | 2.73597800  | -0.29949400 |
| H | -7.63139600 | 1.41341200  | 0.43924000  |
| I | -0.10351800 | 3.91539600  | 0.63617000  |
| H | 5.11389300  | -1.13168700 | -3.52260400 |
| O | 3.30716200  | -1.84652500 | -5.46167000 |
| C | 4.64661300  | -2.15462200 | -5.81508300 |
| H | 5.10221100  | -2.86128800 | -5.10772400 |
| H | 4.59898600  | -2.61847500 | -6.80150200 |
| H | 5.27044500  | -1.25298700 | -5.86893300 |

(F) L

Total energy: -3271.98410261 Hartree

Free energy: -3271.670245 Hartree

|    |             |             |             |
|----|-------------|-------------|-------------|
| As | 0.00040000  | -0.00046600 | -1.76237100 |
| C  | -0.27376700 | 1.70300500  | -0.82531300 |

|   |             |             |             |
|---|-------------|-------------|-------------|
| C | -1.04710000 | 1.84319200  | 0.32998100  |
| C | 0.33686800  | 2.85367600  | -1.35346200 |
| C | -1.20909400 | 3.08359000  | 0.95533400  |
| H | -1.53569400 | 0.97460200  | 0.76033500  |
| C | 0.19401000  | 4.09210100  | -0.74213500 |
| H | 0.93669500  | 2.78030800  | -2.25748900 |
| C | -0.58394500 | 4.21548000  | 0.41921900  |
| H | -1.81867000 | 3.15069300  | 1.84883900  |
| H | 0.66662500  | 4.98210800  | -1.14494200 |
| C | 1.61253700  | -0.61452800 | -0.82489300 |
| C | 2.30721700  | -1.71503500 | -1.35602100 |
| C | 2.11715300  | -0.01807700 | 0.33358700  |
| C | 3.45124300  | -2.21014600 | -0.74456800 |
| H | 1.94652500  | -2.19511300 | -2.26258700 |
| C | 3.27232800  | -0.49771700 | 0.95923800  |
| H | 1.60653600  | 0.83665700  | 0.76617800  |
| C | 3.94351300  | -1.60145400 | 0.42003800  |
| H | 3.98845600  | -3.06161500 | -1.14969600 |
| H | 3.63254600  | -0.00601500 | 1.85529300  |
| C | -1.33790700 | -1.08956000 | -0.82553800 |
| C | -2.63758400 | -1.14239400 | -1.35830300 |
| C | -1.07485300 | -1.82296600 | 0.33438900  |
| C | -3.63882200 | -1.88520900 | -0.74706600 |
| H | -2.87211200 | -0.59138600 | -2.26594800 |
| C | -2.06823400 | -2.58313500 | 0.95984500  |
| H | -0.07997000 | -1.80690900 | 0.76840900  |
| C | -3.35898600 | -2.61397100 | 0.41900400  |
| H | -4.64427200 | -1.92581000 | -1.15345200 |
| H | -1.82339500 | -3.13953000 | 1.85702100  |
| O | -0.66902300 | 5.47345900  | 0.94177900  |
| O | 5.07579500  | -2.15629100 | 0.94240500  |
| O | -4.40592400 | -3.31689800 | 0.94109400  |
| C | 5.62767500  | -1.57716200 | 2.11432400  |
| H | 6.51583200  | -2.16488200 | 2.35245600  |
| H | 5.92054300  | -0.53122600 | 1.95182100  |
| H | 4.92778500  | -1.62385200 | 2.95954400  |

|   |             |             |            |
|---|-------------|-------------|------------|
| C | -4.18142300 | -4.08227300 | 2.11462800 |
| H | -5.13451300 | -4.55772900 | 2.35233000 |
| H | -3.42137300 | -4.85867800 | 1.95441000 |
| H | -3.87336900 | -3.45117700 | 2.95916600 |
| C | -1.45138400 | 5.66295200  | 2.11026800 |
| H | -1.38528800 | 6.72571700  | 2.34922900 |
| H | -2.50343000 | 5.39591000  | 1.94280800 |
| H | -1.06610200 | 5.07890800  | 2.95695400 |

(G) L-PdAr-I

Total energy: -3757.61221020 Hartree

Free energy: -3757.190095 Hartree

|    |             |             |             |
|----|-------------|-------------|-------------|
| Pd | 0.34176400  | 1.88135000  | -0.24528100 |
| As | -0.85644800 | -0.21893800 | 0.02929500  |
| C  | -1.98502800 | -0.64217600 | -1.49024100 |
| C  | -3.09190600 | -1.48796600 | -1.38190100 |
| C  | -1.65767300 | -0.10931300 | -2.74814200 |
| C  | -3.86379900 | -1.80826200 | -2.49956300 |
| H  | -3.37110200 | -1.89964400 | -0.41659800 |
| C  | -2.41394800 | -0.42385900 | -3.86908800 |
| H  | -0.80910200 | 0.56329300  | -2.84642700 |
| C  | -3.52278200 | -1.27708400 | -3.75220700 |
| H  | -4.71895500 | -2.46309800 | -2.38381200 |
| H  | -2.17464100 | -0.01662900 | -4.84572300 |
| C  | 0.24014400  | -1.80131100 | 0.23189900  |
| C  | 1.01250800  | -1.92639900 | 1.39000200  |
| C  | 0.43240500  | -2.71398400 | -0.81425900 |
| C  | 1.99069300  | -2.91081200 | 1.49979700  |
| H  | 0.88376900  | -1.22526800 | 2.20861100  |
| C  | 1.40977500  | -3.69761600 | -0.71927700 |
| H  | -0.16283800 | -2.63887700 | -1.71928300 |
| C  | 2.21769100  | -3.77940700 | 0.42460700  |
| H  | 2.59600400  | -2.95632300 | 2.39582500  |
| H  | 1.58754200  | -4.39664100 | -1.52995300 |
| C  | -2.04110000 | -0.29838800 | 1.55859100  |
| C  | -2.57606600 | 0.88626400  | 2.07179200  |

|   |             |             |             |
|---|-------------|-------------|-------------|
| C | -2.39131900 | -1.51767400 | 2.16191400  |
| C | -3.45505600 | 0.87176200  | 3.15611300  |
| H | -2.29956200 | 1.84177200  | 1.63298200  |
| C | -3.26388400 | -1.54669200 | 3.24071900  |
| H | -1.96588900 | -2.44664000 | 1.79424700  |
| C | -3.80481800 | -0.35175000 | 3.74389800  |
| H | -3.84850200 | 1.80806100  | 3.53249400  |
| H | -3.54151200 | -2.47992500 | 3.71957700  |
| C | 2.06264700  | 0.90569200  | -0.06930300 |
| C | 2.51213200  | 0.10475300  | -1.11494000 |
| C | 2.76557800  | 0.94471900  | 1.13870100  |
| C | 3.63042800  | -0.71898400 | -0.94147600 |
| H | 1.98177600  | 0.07469000  | -2.06121700 |
| C | 3.87998100  | 0.12405800  | 1.31261400  |
| H | 2.44902900  | 1.59815100  | 1.94450000  |
| C | 4.29878500  | -0.73195000 | 0.28602800  |
| H | 3.93624000  | -1.36267200 | -1.75691300 |
| H | 4.43083500  | 0.12341000  | 2.24806500  |
| O | -4.64669600 | -0.48976700 | 4.80217400  |
| O | 3.20774600  | -4.71562200 | 0.39093900  |
| O | -4.19986700 | -1.52102300 | -4.90554500 |
| O | 5.35352100  | -1.55831300 | 0.58491800  |
| C | -5.34126300 | -2.36680400 | -4.85689900 |
| H | -6.12071300 | -1.95636600 | -4.20194800 |
| H | -5.72060900 | -2.41766900 | -5.87836100 |
| H | -5.08120500 | -3.37790300 | -4.51738700 |
| C | 4.09809400  | -4.78486200 | 1.50215600  |
| H | 3.57228700  | -5.08080700 | 2.41904500  |
| H | 4.83202100  | -5.55127800 | 1.24849600  |
| H | 4.60644800  | -3.82667600 | 1.66447700  |
| C | -5.21958300 | 0.68171900  | 5.36983200  |
| H | -5.83775200 | 1.22253300  | 4.64169200  |
| H | -5.84937100 | 0.33925900  | 6.19198200  |
| H | -4.44945100 | 1.35846200  | 5.76167000  |
| C | 5.83700600  | -2.40934000 | -0.44581400 |
| H | 6.17534000  | -1.83554300 | -1.31843900 |

|   |            |             |             |
|---|------------|-------------|-------------|
| H | 6.68783800 | -2.94453500 | -0.01984400 |
| H | 5.07532600 | -3.13501400 | -0.76048100 |
| I | 1.34722400 | 4.27842500  | -0.56838300 |

(H) Transition state for the isomerization

(TS connecting between L-PdAr-I and Ar-PdL-I)

imaginary mode 26.83 i cm<sup>-1</sup>

Total energy: -3757.60805201 Hartree

Free energy: -3757.184901 Hartree

|    |             |             |             |
|----|-------------|-------------|-------------|
| Pd | -0.36123400 | 1.80568300  | -0.45906100 |
| As | -0.39178100 | -0.51052500 | 0.08250500  |
| C  | -1.32556700 | -1.51981600 | -1.28098500 |
| C  | -1.82378700 | -2.79708200 | -1.00955500 |
| C  | -1.48552300 | -0.98220200 | -2.56772500 |
| C  | -2.46679600 | -3.54031100 | -1.99951600 |
| H  | -1.72460900 | -3.22277800 | -0.01524100 |
| C  | -2.12197200 | -1.71300900 | -3.56178900 |
| H  | -1.12274600 | 0.01863000  | -2.78615000 |
| C  | -2.61559600 | -2.99776700 | -3.28496300 |
| H  | -2.84633100 | -4.52634700 | -1.76071800 |
| H  | -2.25982500 | -1.30896100 | -4.55900300 |
| C  | 1.27693300  | -1.46021600 | 0.31111600  |
| C  | 2.07170100  | -1.15288000 | 1.41922300  |
| C  | 1.81153200  | -2.26125300 | -0.70796200 |
| C  | 3.39267600  | -1.58447600 | 1.49808100  |
| H  | 1.67651100  | -0.53215200 | 2.21699600  |
| C  | 3.12972600  | -2.69576200 | -0.64202200 |
| H  | 1.20648300  | -2.51941400 | -1.57186000 |
| C  | 3.93998300  | -2.32421200 | 0.44170900  |
| H  | 3.99199900  | -1.29716600 | 2.35229900  |
| H  | 3.56716100  | -3.29356400 | -1.43483300 |
| C  | -1.35991700 | -0.84580900 | 1.72247700  |
| C  | -2.34875700 | 0.05382100  | 2.13261500  |
| C  | -1.11358300 | -1.99110800 | 2.49722800  |
| C  | -3.09311100 | -0.17894500 | 3.28954300  |
| H  | -2.54099300 | 0.95406300  | 1.55437100  |

|   |             |             |             |
|---|-------------|-------------|-------------|
| C | -1.84818700 | -2.23213400 | 3.64981600  |
| H | -0.33451500 | -2.68907700 | 2.20575700  |
| C | -2.84540600 | -1.32851300 | 4.05304100  |
| H | -3.84987900 | 0.53814600  | 3.58293800  |
| H | -1.66915500 | -3.10996600 | 4.26184400  |
| C | 1.61194600  | 1.64404900  | -0.29903200 |
| C | 2.38356100  | 1.08175200  | -1.31593800 |
| C | 2.23763900  | 2.11197200  | 0.86440900  |
| C | 3.76958600  | 0.95753500  | -1.17398500 |
| H | 1.91536200  | 0.69443000  | -2.21579400 |
| C | 3.61882700  | 1.98956600  | 1.01050600  |
| H | 1.65517600  | 2.55737600  | 1.66586700  |
| C | 4.38553600  | 1.38078200  | 0.00789600  |
| H | 4.33779500  | 0.49152000  | -1.96958900 |
| H | 4.11871100  | 2.33264300  | 1.91107400  |
| O | -3.50484900 | -1.65563600 | 5.19523400  |
| O | 5.24575000  | -2.70560700 | 0.37011700  |
| O | -3.22299800 | -3.62951300 | -4.32350300 |
| O | 5.71778100  | 1.21379100  | 0.28872700  |
| C | -3.76472600 | -4.92597900 | -4.10766000 |
| H | -4.54777200 | -4.91356700 | -3.33856700 |
| H | -4.20115300 | -5.23075000 | -5.05973700 |
| H | -2.98778300 | -5.64610500 | -3.81951800 |
| C | 6.12496300  | -2.27283900 | 1.40536700  |
| H | 5.84957400  | -2.70869400 | 2.37427100  |
| H | 7.11657600  | -2.62922600 | 1.12267300  |
| H | 6.13588800  | -1.17887700 | 1.48698600  |
| C | -4.52076300 | -0.77801500 | 5.66639000  |
| H | -5.33648000 | -0.67772800 | 4.93906900  |
| H | -4.90722300 | -1.23075800 | 6.58044200  |
| H | -4.11914100 | 0.21695700  | 5.89682700  |
| C | 6.53191000  | 0.61067700  | -0.70805000 |
| H | 6.53275300  | 1.19446900  | -1.63782200 |
| H | 7.54378900  | 0.59073900  | -0.29903300 |
| H | 6.20929400  | -0.41629400 | -0.92619300 |
| I | -1.98238500 | 3.85013500  | -0.91451400 |

(I) Ar-PdL-X

Total energy: -3757.61240367 Hartree

Free energy: -3757.188408 Hartree

|    |             |             |             |
|----|-------------|-------------|-------------|
| Pd | 0.19355000  | -1.34120200 | -1.53561600 |
| As | 0.30845600  | 0.23006900  | 0.22202400  |
| C  | 1.35420100  | 1.78825700  | -0.25270400 |
| C  | 1.57524200  | 2.78059600  | 0.70747600  |
| C  | 1.89325100  | 1.94417500  | -1.53757100 |
| C  | 2.31723500  | 3.92085700  | 0.40102900  |
| H  | 1.17030200  | 2.67410900  | 1.70969800  |
| C  | 2.63227800  | 3.07642500  | -1.85376700 |
| H  | 1.75420100  | 1.16934900  | -2.28447500 |
| C  | 2.84948900  | 4.07168900  | -0.88852100 |
| H  | 2.47500300  | 4.67265700  | 1.16467200  |
| H  | 3.06220400  | 3.20870200  | -2.84080700 |
| C  | -1.35649100 | 0.97369800  | 0.87089100  |
| C  | -2.19994900 | 0.16059700  | 1.63359200  |
| C  | -1.83963800 | 2.20493500  | 0.40472300  |
| C  | -3.51537400 | 0.53249700  | 1.89399900  |
| H  | -1.84623700 | -0.79803200 | 1.99885900  |
| C  | -3.15184800 | 2.58653100  | 0.65651800  |
| H  | -1.19805700 | 2.85553200  | -0.18148600 |
| C  | -4.00923400 | 1.73322100  | 1.36747900  |
| H  | -4.15152700 | -0.13777100 | 2.45737100  |
| H  | -3.54837000 | 3.52395500  | 0.28075100  |
| C  | 1.14201800  | -0.50176100 | 1.80788700  |
| C  | 2.08381400  | -1.52774000 | 1.69192000  |
| C  | 0.85125200  | 0.02078500  | 3.07946100  |
| C  | 2.73593100  | -2.02902600 | 2.81910300  |
| H  | 2.32123400  | -1.94255800 | 0.71674400  |
| C  | 1.49438100  | -0.47164900 | 4.20588200  |
| H  | 0.10967900  | 0.80527500  | 3.19323800  |
| C  | 2.44389400  | -1.49973000 | 4.08355000  |
| H  | 3.46110600  | -2.82400300 | 2.69570500  |
| H  | 1.28008000  | -0.08117800 | 5.19523600  |



|   |             |             |             |
|---|-------------|-------------|-------------|
| C | -1.79172600 | -1.27379700 | -1.29651300 |
| C | -2.55887100 | -0.24870500 | -1.85955500 |
| C | -2.44832200 | -2.27736900 | -0.56405400 |
| C | -3.94668400 | -0.20710000 | -1.69831500 |
| H | -2.07747300 | 0.56168700  | -2.40022500 |
| C | -3.83178400 | -2.24650400 | -0.39710800 |
| H | -1.88082300 | -3.08004200 | -0.09906800 |
| C | -4.58228000 | -1.19217600 | -0.93507200 |
| H | -4.50303000 | 0.61638800  | -2.12924100 |
| H | -4.34690600 | -3.00941700 | 0.17868900  |
| O | 3.01473400  | -1.91117300 | 5.24633500  |
| O | -5.30443800 | 2.14028000  | 1.47548600  |
| O | 3.58593100  | 5.13817700  | -1.29851000 |
| O | -5.91884800 | -1.18847600 | -0.62805200 |
| C | 3.86329200  | 6.17204600  | -0.36382600 |
| H | 4.43185800  | 5.79696600  | 0.49702600  |
| H | 4.46584600  | 6.90694900  | -0.89937000 |
| H | 2.94290200  | 6.65196200  | -0.00594600 |
| C | -6.22676100 | 1.26697000  | 2.12245200  |
| H | -5.97375700 | 1.12918700  | 3.18150200  |
| H | -7.20031100 | 1.75374600  | 2.04841100  |
| H | -6.26533600 | 0.28911400  | 1.62647800  |
| C | 3.98582100  | -2.94949300 | 5.19295200  |
| H | 4.85238500  | -2.66050100 | 4.58479200  |
| H | 4.30670800  | -3.11270100 | 6.22268200  |
| H | 3.56053400  | -3.87945900 | 4.79447300  |
| C | -6.71842600 | -0.14547100 | -1.16960800 |
| H | -6.70447500 | -0.15354000 | -2.26731900 |
| H | -7.73627000 | -0.33571400 | -0.82413100 |
| H | -6.39272600 | 0.84079200  | -0.81252700 |
| I | 2.70304900  | -1.90085700 | -2.33181200 |

(J) vinylSnBu<sub>3</sub>

Total energy: -554.982388922 Hartree

Free energy: -554.630126 Hartree

|   |             |             |             |
|---|-------------|-------------|-------------|
| C | -4.29773400 | -0.13062200 | -0.01833800 |
|---|-------------|-------------|-------------|

|    |             |             |             |
|----|-------------|-------------|-------------|
| C  | -3.29309400 | -1.00791400 | -0.12733800 |
| Sn | -1.21311400 | -0.43822200 | -0.05274700 |
| H  | -5.34468100 | -0.43345500 | -0.05606000 |
| H  | -4.12907900 | 0.93744700  | 0.11468800  |
| H  | -3.55089400 | -2.06073000 | -0.25811100 |
| C  | -1.09789400 | 1.73425000  | 0.18849500  |
| H  | -1.91834600 | 2.19128300  | -0.37879200 |
| H  | -1.28226500 | 1.97511900  | 1.24275400  |
| C  | -0.17106200 | -1.00480000 | -1.89427000 |
| H  | -0.44016700 | -0.27907200 | -2.67176300 |
| H  | -0.55819500 | -1.97358800 | -2.23348600 |
| C  | -0.18897900 | -1.38961900 | 1.63456300  |
| H  | -0.89626000 | -1.47095100 | 2.46871100  |
| H  | 0.07072100  | -2.41680300 | 1.34934500  |
| C  | 1.07223800  | -0.63373400 | 2.08538600  |
| H  | 1.77720700  | -0.53978900 | 1.24738900  |
| H  | 0.81035600  | 0.39494000  | 2.37147500  |
| C  | 1.79533800  | -1.30423900 | 3.26223800  |
| H  | 1.09821200  | -1.39575000 | 4.10629600  |
| H  | 2.06560900  | -2.33049500 | 2.97827000  |
| C  | 3.04884100  | -0.54243200 | 3.70482200  |
| H  | 3.54825400  | -1.03829500 | 4.54374900  |
| H  | 3.77202600  | -0.46458600 | 2.88457600  |
| H  | 2.79889200  | 0.47721100  | 4.02057800  |
| C  | 1.35738300  | -1.07389200 | -1.74189800 |
| H  | 1.62455300  | -1.80119500 | -0.96200300 |
| H  | 1.74681600  | -0.10692600 | -1.39347200 |
| C  | 2.08117700  | -1.45538000 | -3.04118500 |
| H  | 1.70096500  | -2.42448900 | -3.39211600 |
| H  | 1.82294700  | -0.72678600 | -3.82174600 |
| C  | 3.60321400  | -1.52317100 | -2.87920500 |
| H  | 3.88610200  | -2.26591800 | -2.12411500 |
| H  | 4.09791000  | -1.79617400 | -3.81720100 |
| H  | 4.00801900  | -0.55654600 | -2.55731300 |
| C  | 0.24486500  | 2.33395200  | -0.26156400 |
| H  | 0.43159300  | 2.08720600  | -1.31645800 |

|   |             |            |             |
|---|-------------|------------|-------------|
| H | 1.07045800  | 1.87731900 | 0.30232000  |
| C | 0.31785300  | 3.85802700 | -0.09108600 |
| H | -0.50124600 | 4.32168700 | -0.65766200 |
| H | 0.13861500  | 4.10913600 | 0.96328800  |
| C | 1.65862200  | 4.44599700 | -0.54277400 |
| H | 1.84559800  | 4.23193300 | -1.60157800 |
| H | 1.68823100  | 5.53278900 | -0.41204900 |
| H | 2.48912200  | 4.01802900 | 0.03077600  |

(K) Cation- $\pi$  complex between Ar-PdL-X and vinylSnBu<sub>3</sub>

Total energy: -4312.65003698 Hartree

Free energy: -4311.851582 Hartree

|    |             |             |             |
|----|-------------|-------------|-------------|
| Pd | -0.17168700 | -0.13578000 | -0.93598600 |
| As | 1.97564600  | -0.43151600 | 0.17223000  |
| C  | 1.98038700  | -1.52886600 | 1.76791200  |
| C  | 3.13378900  | -2.21632100 | 2.17311100  |
| C  | 0.84211000  | -1.57881400 | 2.57229100  |
| C  | 3.14167600  | -2.93634400 | 3.35970000  |
| H  | 4.02663500  | -2.19952400 | 1.55538300  |
| C  | 0.83891100  | -2.28978800 | 3.77331600  |
| H  | -0.06460400 | -1.07930300 | 2.25405800  |
| C  | 1.99449800  | -2.97554900 | 4.16963200  |
| H  | 4.02115400  | -3.48248800 | 3.68440000  |
| H  | -0.06506700 | -2.31483900 | 4.36931200  |
| C  | 2.95637400  | 1.12725000  | 0.79950800  |
| C  | 3.51588800  | 2.04256000  | -0.10912500 |
| C  | 3.08340800  | 1.38055700  | 2.16713400  |
| C  | 4.17666100  | 3.17453700  | 0.34119400  |
| H  | 3.42068800  | 1.88056700  | -1.17665200 |
| C  | 3.73903000  | 2.52328300  | 2.63407900  |
| H  | 2.66764300  | 0.68765700  | 2.89089600  |
| C  | 4.28815800  | 3.42796000  | 1.71794400  |
| H  | 4.59862900  | 3.89172800  | -0.35471400 |
| H  | 3.81144100  | 2.69004100  | 3.70187000  |
| C  | 3.23280700  | -1.29153900 | -1.02473800 |
| C  | 2.75382100  | -2.21673300 | -1.95792300 |

|    |             |             |             |
|----|-------------|-------------|-------------|
| C  | 4.61237400  | -1.03768700 | -0.96464200 |
| C  | 3.62561800  | -2.88219400 | -2.82107400 |
| H  | 1.69063100  | -2.43372400 | -2.00884800 |
| C  | 5.48834500  | -1.69345900 | -1.81943200 |
| H  | 5.00485600  | -0.31697600 | -0.25450800 |
| C  | 5.00111700  | -2.62128500 | -2.75361700 |
| H  | 3.22280600  | -3.59534800 | -3.52995600 |
| H  | 6.55665100  | -1.50651500 | -1.78609600 |
| C  | 0.59740700  | 1.63244500  | -1.56663600 |
| C  | 0.45237100  | 2.83475800  | -0.85571800 |
| C  | 1.28281100  | 1.66304200  | -2.78409500 |
| C  | 0.98010300  | 4.02507400  | -1.34598400 |
| H  | -0.05869100 | 2.84530500  | 0.10248000  |
| C  | 1.82568100  | 2.85557200  | -3.28831300 |
| H  | 1.42774000  | 0.74838300  | -3.35418800 |
| C  | 1.67778300  | 4.04212600  | -2.56224100 |
| H  | 0.88204900  | 4.95455600  | -0.79374500 |
| H  | 2.35889900  | 2.83640400  | -4.23191000 |
| C  | -2.26495000 | 0.78875900  | -1.47603800 |
| C  | -1.86869800 | 0.00519300  | -2.53156000 |
| H  | -2.01607200 | 1.84753500  | -1.55819800 |
| H  | -1.35480000 | 0.43689300  | -3.39076200 |
| I  | -1.01890600 | -2.75234100 | -0.37898700 |
| O  | 2.17757600  | 5.25869600  | -2.94163600 |
| C  | 2.90166000  | 5.33100400  | -4.15775600 |
| H  | 3.20943400  | 6.37250400  | -4.26678700 |
| H  | 3.79560800  | 4.69209400  | -4.13867700 |
| H  | 2.28218200  | 5.04712000  | -5.01961300 |
| Sn | -3.72521000 | 0.30649600  | 0.08537100  |
| C  | -5.05590100 | 2.04833300  | 0.04743700  |
| H  | -4.50282800 | 2.91880600  | 0.42320500  |
| H  | -5.30261800 | 2.27000500  | -0.99842900 |
| C  | -4.87919800 | -1.45446100 | -0.46350800 |
| H  | -5.59195900 | -1.65559300 | 0.34630200  |
| C  | -2.74943800 | 0.26219500  | 2.03707400  |
| H  | -3.53077700 | 0.37544100  | 2.79939600  |

|   |             |             |             |
|---|-------------|-------------|-------------|
| H | -2.30895600 | -0.73091900 | 2.17223100  |
| C | -6.34533100 | 1.85126900  | 0.85996600  |
| H | -6.89361200 | 0.97374300  | 0.48715500  |
| H | -6.10132500 | 1.62755600  | 1.90925800  |
| C | -7.28205600 | 3.06772300  | 0.82368500  |
| H | -6.74199900 | 3.94636700  | 1.20208200  |
| H | -7.53375000 | 3.29255000  | -0.22173100 |
| C | -8.56663800 | 2.86057000  | 1.63258900  |
| H | -8.34071900 | 2.66327600  | 2.68708600  |
| H | -9.21735600 | 3.74033800  | 1.59010900  |
| H | -9.13710700 | 2.00484500  | 1.25298500  |
| H | -2.18401700 | -1.02944000 | -2.63307900 |
| C | -1.68805600 | 1.36094500  | 2.19966700  |
| H | -0.86768000 | 1.18022300  | 1.48996400  |
| H | -2.10795100 | 2.34132400  | 1.92842300  |
| C | -1.10383200 | 1.46435000  | 3.61561100  |
| H | -0.63346400 | 0.51015100  | 3.88555100  |
| H | -1.92252600 | 1.61642400  | 4.33213200  |
| C | -0.08079900 | 2.59772300  | 3.74503400  |
| H | 0.34599400  | 2.64448000  | 4.75292100  |
| H | 0.74557200  | 2.46526100  | 3.03903600  |
| H | -0.54293100 | 3.56931600  | 3.53352700  |
| H | -4.18823600 | -2.30173700 | -0.49988700 |
| C | -5.62347400 | -1.30072300 | -1.79860700 |
| H | -6.30186600 | -0.43549600 | -1.76151500 |
| H | -4.90749100 | -1.08663200 | -2.60506800 |
| C | -6.43337800 | -2.54852800 | -2.17927100 |
| H | -7.15350700 | -2.76596000 | -1.37855300 |
| H | -5.75620500 | -3.41179300 | -2.22341700 |
| C | -7.17178200 | -2.39859200 | -3.51324900 |
| H | -6.46854500 | -2.21028900 | -4.33292400 |
| H | -7.74093500 | -3.30017600 | -3.76321900 |
| H | -7.87470000 | -1.55764800 | -3.48287300 |
| O | 5.94092500  | -3.20748000 | -3.54406500 |
| O | 4.94370100  | 4.57247100  | 2.05502000  |
| O | 2.10794600  | -3.70575500 | 5.31273500  |

|   |            |             |             |
|---|------------|-------------|-------------|
| C | 5.06145400 | 4.90017600  | 3.43215800  |
| H | 5.59822500 | 5.84923000  | 3.47112800  |
| H | 4.07770800 | 5.02131000  | 3.90439300  |
| H | 5.63190300 | 4.14024100  | 3.98239200  |
| C | 5.51399500 | -4.16501800 | -4.50400400 |
| H | 4.82997100 | -3.72272500 | -5.23999700 |
| H | 6.41781500 | -4.50425300 | -5.01222700 |
| H | 5.02266900 | -5.02343200 | -4.02809500 |
| C | 0.96841000 | -3.82082700 | 6.15383900  |
| H | 1.27385300 | -4.45258400 | 6.98929500  |
| H | 0.64863600 | -2.84339000 | 6.53869800  |
| H | 0.12680800 | -4.29320800 | 5.63102400  |

(L) Transition state for the transmetalation

imaginary mode 39.33 i cm<sup>-1</sup>

Total energy: -4312.61976682 Hartree

Free energy: -4311.816807 Hartree

|    |             |             |             |
|----|-------------|-------------|-------------|
| Pd | -0.06056900 | -0.84660700 | -1.40624900 |
| C  | -0.66699100 | 1.41819600  | 1.43978800  |
| C  | -0.09159400 | 2.69058800  | 1.45355800  |
| C  | -0.49205400 | 0.59341800  | 2.56508800  |
| C  | 0.62643700  | 3.14988300  | 2.56273300  |
| H  | -0.19986100 | 3.34185300  | 0.59267900  |
| C  | 0.22333700  | 1.03279100  | 3.67134400  |
| H  | -0.94101300 | -0.39580300 | 2.58516100  |
| C  | 0.78122000  | 2.32100500  | 3.68017600  |
| H  | 1.05327600  | 4.14552700  | 2.54215700  |
| H  | 0.35156400  | 0.40619900  | 4.54795600  |
| C  | -3.25251500 | 0.07574100  | 0.62798100  |
| C  | -4.02262600 | -0.84239900 | -0.10537200 |
| C  | -3.74654800 | 0.53614600  | 1.85062800  |
| C  | -5.24483900 | -1.28737200 | 0.37533300  |
| H  | -3.65158800 | -1.23641500 | -1.04488500 |
| C  | -4.97548700 | 0.09395000  | 2.34870100  |
| H  | -3.17114800 | 1.24115200  | 2.44251900  |
| C  | -5.73015800 | -0.82382000 | 1.60767700  |

|    |             |             |             |
|----|-------------|-------------|-------------|
| H  | -5.83487500 | -2.01131100 | -0.17635300 |
| H  | -5.32601600 | 0.46760700  | 3.30343200  |
| C  | -2.15887900 | 2.31105500  | -1.05780900 |
| C  | -1.88207900 | 2.46604400  | -2.42447600 |
| C  | -2.89265400 | 3.30478100  | -0.40427900 |
| C  | -2.32071000 | 3.58921100  | -3.11479700 |
| H  | -1.31570400 | 1.70356900  | -2.94973800 |
| C  | -3.33447500 | 4.44195500  | -1.08166900 |
| H  | -3.13230500 | 3.19757900  | 0.64983100  |
| C  | -3.04666600 | 4.58652800  | -2.44666700 |
| H  | -2.11326100 | 3.71963800  | -4.17170900 |
| H  | -3.89959000 | 5.19500800  | -0.54558600 |
| C  | -1.24160100 | -2.44288900 | -1.03200200 |
| C  | -1.47481400 | -2.90750000 | 0.27433300  |
| C  | -1.94961200 | -3.05906300 | -2.07108600 |
| C  | -2.39283100 | -3.92218700 | 0.53354400  |
| H  | -0.95484200 | -2.46164200 | 1.11617000  |
| C  | -2.89211800 | -4.06832200 | -1.82485500 |
| H  | -1.77918700 | -2.75002700 | -3.09797100 |
| C  | -3.11891600 | -4.50113200 | -0.51423900 |
| H  | -2.58086100 | -4.26651700 | 1.54612800  |
| H  | -3.42705600 | -4.50558600 | -2.66054000 |
| C  | 1.70475500  | -1.98458500 | -3.56709000 |
| C  | 1.11708800  | -2.19829400 | -2.38039800 |
| Sn | 2.94782800  | -0.54609500 | 0.03175800  |
| C  | 4.42731200  | -1.54732800 | -1.21341800 |
| H  | 3.96522700  | -2.49108500 | -1.51752100 |
| H  | 5.26684000  | -1.78861300 | -0.54650700 |
| C  | 1.85079200  | -1.97205200 | 1.26397400  |
| H  | 1.31703500  | -2.63758800 | 0.58397100  |
| H  | 1.10308900  | -1.40732800 | 1.82549500  |
| C  | 3.71678200  | 1.09040400  | 1.26426700  |
| H  | 4.62732200  | 1.46169200  | 0.77843400  |
| H  | 2.97605200  | 1.89412400  | 1.20654400  |
| H  | 1.22448600  | -3.19435800 | -1.94369500 |
| H  | 2.27512900  | -2.76506700 | -4.07572000 |

|   |             |             |             |
|---|-------------|-------------|-------------|
| H | 1.64980900  | -1.02875800 | -4.08342900 |
| O | 1.44863900  | 2.66691900  | 4.81864400  |
| O | -3.42817500 | 5.64883200  | -3.20932300 |
| O | -6.93599500 | -1.32838800 | 1.99422700  |
| C | -7.46980800 | -0.91526200 | 3.24243100  |
| H | -8.41984600 | -1.44049100 | 3.35330700  |
| H | -6.80862000 | -1.18633700 | 4.07634500  |
| H | -7.65192100 | 0.16756200  | 3.26847100  |
| C | -4.17297600 | 6.68933800  | -2.59438200 |
| H | -4.36817800 | 7.42346000  | -3.37763200 |
| H | -5.12892200 | 6.32370300  | -2.19656100 |
| H | -3.60783000 | 7.16877900  | -1.78399000 |
| C | 1.85583100  | 4.01950500  | 4.97957400  |
| H | 1.00060500  | 4.70387200  | 4.91033200  |
| H | 2.29553600  | 4.08312500  | 5.97567500  |
| H | 2.61055600  | 4.31093200  | 4.23907100  |
| C | 3.97870300  | 0.72796800  | 2.73231100  |
| H | 3.04233300  | 0.39893500  | 3.20146200  |
| H | 4.67891600  | -0.11568000 | 2.81352500  |
| C | 4.54229700  | 1.91131100  | 3.53232200  |
| H | 3.89147000  | 2.77902700  | 3.37002700  |
| H | 5.52418600  | 2.18631600  | 3.12432800  |
| C | 4.65220200  | 1.62333100  | 5.03204000  |
| H | 5.08931700  | 2.47019300  | 5.57253100  |
| H | 3.66167400  | 1.42855900  | 5.45547600  |
| H | 5.28369900  | 0.74760300  | 5.22192200  |
| C | 4.91542700  | -0.77539100 | -2.44218200 |
| H | 4.05769000  | -0.52830600 | -3.07773000 |
| H | 5.36207700  | 0.18291700  | -2.14131700 |
| C | 5.93471900  | -1.56954400 | -3.27104900 |
| H | 5.47798000  | -2.52109100 | -3.57527700 |
| H | 6.79720600  | -1.83023900 | -2.64199000 |
| C | 6.40867900  | -0.80512200 | -4.51121600 |
| H | 7.12918100  | -1.38850800 | -5.09418200 |
| H | 5.56477300  | -0.56252700 | -5.16700300 |
| H | 6.89073300  | 0.13899800  | -4.23187300 |



|    |             |             |             |
|----|-------------|-------------|-------------|
| C  | 2.75539400  | -2.77118400 | 2.21473200  |
| H  | 3.30406800  | -2.10139500 | 2.88968900  |
| H  | 3.51479400  | -3.32644800 | 1.64560000  |
| C  | 1.94615100  | -3.76760600 | 3.06133400  |
| H  | 1.19275000  | -3.21182000 | 3.63629800  |
| H  | 1.38786000  | -4.43438300 | 2.39139100  |
| C  | 2.82005000  | -4.59172500 | 4.01167500  |
| H  | 3.36547400  | -3.94397100 | 4.70794700  |
| H  | 2.22004600  | -5.28960600 | 4.60479200  |
| H  | 3.56116000  | -5.17782700 | 3.45613000  |
| As | -1.57291900 | 0.70363700  | -0.13312900 |
| I  | 1.73633100  | 1.38193900  | -1.88533100 |
| O  | -4.01675400 | -5.47297000 | -0.15238100 |
| C  | -4.79314600 | -6.07016600 | -1.17441400 |
| H  | -5.44388100 | -6.79410600 | -0.67983800 |
| H  | -5.41357100 | -5.33135400 | -1.70132700 |
| H  | -4.16847300 | -6.59427900 | -1.91125700 |

(M) Complex between vinyl-PdAr-L and Bu<sub>3</sub>SnI

Total energy: -4312.62297391 Hartree

Free energy: -4311.822872 Hartree

|    |             |             |             |
|----|-------------|-------------|-------------|
| Pd | 0.36407900  | 1.10794100  | -1.27779700 |
| As | 1.80436500  | -0.63627800 | -0.18743400 |
| C  | 0.74392600  | -1.60577800 | 1.13315400  |
| C  | 0.45312100  | -2.96654300 | 1.03704400  |
| C  | 0.16617900  | -0.87009100 | 2.18224400  |
| C  | -0.39036500 | -3.59506000 | 1.95985200  |
| H  | 0.87815200  | -3.55546900 | 0.23082700  |
| C  | -0.66847500 | -1.47936600 | 3.10898500  |
| H  | 0.37272800  | 0.19192700  | 2.27754100  |
| C  | -0.95391800 | -2.85009500 | 3.00174600  |
| H  | -0.59491300 | -4.65373000 | 1.85416800  |
| H  | -1.10746000 | -0.92023600 | 3.92894000  |
| C  | 3.35519200  | -0.11588500 | 0.86564600  |
| C  | 4.22136600  | 0.86464600  | 0.35267000  |
| C  | 3.64901800  | -0.68714600 | 2.10538600  |

|    |             |             |             |
|----|-------------|-------------|-------------|
| C  | 5.34555000  | 1.25837900  | 1.06193100  |
| H  | 3.99708500  | 1.34963300  | -0.59128200 |
| C  | 4.77888300  | -0.29848600 | 2.83204200  |
| H  | 2.99038400  | -1.43943000 | 2.52862400  |
| C  | 5.63262600  | 0.67969800  | 2.30819100  |
| H  | 6.00697100  | 2.03024500  | 0.68333100  |
| H  | 4.97554400  | -0.75870900 | 3.79304400  |
| C  | 2.54032600  | -2.05813400 | -1.28993700 |
| C  | 2.17137000  | -2.14652300 | -2.64146000 |
| C  | 3.44763500  | -2.99088400 | -0.77946800 |
| C  | 2.68496000  | -3.14932900 | -3.45408600 |
| H  | 1.48124100  | -1.42078300 | -3.06056900 |
| C  | 3.96954500  | -4.00669000 | -1.58225400 |
| H  | 3.76687700  | -2.92441300 | 0.25684200  |
| C  | 3.58436800  | -4.08917700 | -2.92800800 |
| H  | 2.40937300  | -3.22559200 | -4.50068900 |
| H  | 4.67198900  | -4.71323300 | -1.15651900 |
| C  | 1.54924000  | 2.61208400  | -0.67269900 |
| C  | 1.65534800  | 2.94027700  | 0.69008800  |
| C  | 2.36312400  | 3.30752400  | -1.57352700 |
| C  | 2.55920700  | 3.90045700  | 1.13779800  |
| H  | 1.04378300  | 2.42606700  | 1.42630300  |
| C  | 3.29096100  | 4.26469500  | -1.13576400 |
| H  | 2.29022800  | 3.10410900  | -2.63769500 |
| C  | 3.39382700  | 4.56034500  | 0.22759100  |
| H  | 2.64992700  | 4.14063200  | 2.19282300  |
| H  | 3.91275800  | 4.76879400  | -1.86718800 |
| C  | -1.66004500 | 2.45934400  | -3.06740400 |
| C  | -0.84493100 | 2.57510900  | -2.00647300 |
| Sn | -3.37524300 | -0.01778500 | -0.14883500 |
| C  | -4.12039000 | -1.78107900 | 0.89741800  |
| H  | -5.02855900 | -2.11384000 | 0.38088300  |
| H  | -3.36965900 | -2.56780800 | 0.76646300  |
| C  | -4.77527400 | 0.91737400  | -1.52449400 |
| H  | -4.18438800 | 1.64488100  | -2.09089100 |
| H  | -5.10183800 | 0.14799100  | -2.23316400 |

|   |             |             |             |
|---|-------------|-------------|-------------|
| C | -2.29935700 | 1.40620700  | 1.09388800  |
| H | -2.34602900 | 1.06177200  | 2.13269600  |
| H | -1.25598500 | 1.34691200  | 0.76656800  |
| H | -0.82995500 | 3.54488400  | -1.50352300 |
| H | -2.28091500 | 3.29212500  | -3.40748700 |
| H | -1.74240900 | 1.54514100  | -3.65144000 |
| C | -2.81661200 | 2.84385400  | 0.94239000  |
| H | -2.87276800 | 3.10575700  | -0.12106300 |
| H | -3.83747800 | 2.92849400  | 1.34210000  |
| C | -4.38813800 | -1.55260100 | 2.39252600  |
| H | -3.44976500 | -1.28962400 | 2.89480100  |
| H | -5.06949500 | -0.70305100 | 2.54635800  |
| C | -5.98292800 | 1.58839500  | -0.85186700 |
| H | -5.64359000 | 2.35242400  | -0.13949200 |
| H | -6.55423300 | 0.85427300  | -0.26488000 |
| C | -6.92744500 | 2.25066800  | -1.86671500 |
| H | -6.35920300 | 2.98510400  | -2.45257500 |
| H | -7.27439100 | 1.49202600  | -2.58103900 |
| C | -1.91528200 | 3.86795500  | 1.64621600  |
| H | -0.90728300 | 3.79920900  | 1.22133900  |
| H | -1.82574900 | 3.60456600  | 2.70967800  |
| C | -4.98358000 | -2.79108900 | 3.07772100  |
| H | -4.36761100 | -3.66203000 | 2.82333900  |
| H | -5.98037800 | -2.99032000 | 2.66165900  |
| C | -5.06216000 | -2.64714800 | 4.60007900  |
| H | -5.51649400 | -3.52901100 | 5.06485700  |
| H | -4.05881000 | -2.51911900 | 5.01949300  |
| H | -5.66283300 | -1.77582800 | 4.88599200  |
| C | -8.13003700 | 2.93121300  | -1.20547900 |
| H | -7.80619100 | 3.71408200  | -0.50993700 |
| H | -8.78675100 | 3.39600900  | -1.94803000 |
| H | -8.72799200 | 2.21014000  | -0.63593400 |
| C | -2.43225800 | 5.30274200  | 1.50609000  |
| H | -1.77003900 | 6.01709900  | 2.00575700  |
| H | -2.49675200 | 5.59093000  | 0.45045200  |
| H | -3.43297300 | 5.41108600  | 1.94135700  |

|   |             |             |             |
|---|-------------|-------------|-------------|
| O | -1.78900700 | -3.35468800 | 3.95651100  |
| O | 6.75640600  | 1.14121400  | 2.92691600  |
| O | 4.02914200  | -5.03296400 | -3.80380300 |
| C | -2.03329000 | -4.75433200 | 3.96688200  |
| H | -2.70545400 | -4.93438200 | 4.80677600  |
| H | -2.51940300 | -5.08968300 | 3.04196000  |
| H | -1.10478800 | -5.32180200 | 4.11049800  |
| C | 7.08381600  | 0.61843300  | 4.20473100  |
| H | 7.99739900  | 1.12838000  | 4.51472500  |
| H | 6.29250700  | 0.81774700  | 4.93966500  |
| H | 7.27085300  | -0.46323300 | 4.16603700  |
| C | 4.95228300  | -6.00571000 | -3.33752400 |
| H | 5.16981500  | -6.64840500 | -4.19199700 |
| H | 5.88487700  | -5.54456300 | -2.98638900 |
| H | 4.52682000  | -6.61394700 | -2.52819800 |
| I | -1.54563400 | -1.20096600 | -2.01069800 |
| O | 4.26747000  | 5.46872500  | 0.77021900  |
| C | 5.14371200  | 6.14990700  | -0.10813900 |
| H | 5.80356700  | 5.45573000  | -0.64786600 |
| H | 4.59762300  | 6.75837900  | -0.84263400 |
| H | 5.75244100  | 6.80676100  | 0.51652300  |

(N) vinyl-PdAr-L

Total energy: -3824.11566540 Hartree

Free energy: -3823.655952 Hartree

|    |             |             |             |
|----|-------------|-------------|-------------|
| Pd | 0.55984800  | -1.33851000 | -2.18202400 |
| As | -0.68337500 | -0.18026100 | -0.34967300 |
| C  | -2.59516900 | 0.09745000  | -0.57697100 |
| C  | -3.49825800 | 0.07912800  | 0.48860300  |
| C  | -3.08616700 | 0.33828900  | -1.87121200 |
| C  | -4.86280200 | 0.29511000  | 0.28307500  |
| H  | -3.14268100 | -0.11306500 | 1.49651000  |
| C  | -4.43887100 | 0.56112400  | -2.09094900 |
| H  | -2.40117700 | 0.35177200  | -2.71593100 |
| C  | -5.33762900 | 0.53975600  | -1.01276800 |
| H  | -5.53768100 | 0.26894000  | 1.13025500  |

|   |             |             |             |
|---|-------------|-------------|-------------|
| H | -4.82905000 | 0.74706200  | -3.08612700 |
| C | -0.06259500 | 1.59617200  | 0.14838000  |
| C | 1.28469400  | 1.76955000  | 0.51630200  |
| C | -0.90230500 | 2.71103300  | 0.12880700  |
| C | 1.76791200  | 3.02529900  | 0.85206900  |
| H | 1.96122000  | 0.92313100  | 0.54412000  |
| C | -0.42390800 | 3.98300800  | 0.45959800  |
| H | -1.94659200 | 2.60121800  | -0.14686900 |
| C | 0.91842900  | 4.14284700  | 0.82271900  |
| H | 2.80552400  | 3.16754400  | 1.13574100  |
| H | -1.10229100 | 4.82734700  | 0.43160500  |
| C | -0.57391200 | -1.12304500 | 1.34500000  |
| C | -0.49208100 | -2.52519300 | 1.33122800  |
| C | -0.55652700 | -0.46256600 | 2.57520800  |
| C | -0.40482400 | -3.24459800 | 2.51460600  |
| H | -0.47882300 | -3.05422200 | 0.38127500  |
| C | -0.46715700 | -1.17261700 | 3.77552600  |
| H | -0.59733000 | 0.62210800  | 2.60746900  |
| C | -0.39200600 | -2.57124100 | 3.74707700  |
| H | -0.33427500 | -4.32733200 | 2.51638300  |
| H | -0.44985000 | -0.62987600 | 4.71302100  |
| C | 2.35122700  | -0.94636700 | -1.39187600 |
| C | 3.15293100  | 0.06217100  | -1.93048600 |
| C | 2.74482200  | -1.54813900 | -0.18514700 |
| C | 4.29545400  | 0.51651100  | -1.25667000 |
| H | 2.88654600  | 0.52844000  | -2.87406500 |
| C | 3.88250200  | -1.10690900 | 0.48829300  |
| H | 2.15066000  | -2.34137300 | 0.25597200  |
| C | 4.65837400  | -0.06369700 | -0.03699800 |
| H | 4.88076000  | 1.31725300  | -1.69387500 |
| H | 4.18596800  | -1.55528500 | 1.42944000  |
| C | 1.20657600  | -3.53631400 | -4.01058600 |
| C | 1.53095500  | -2.28407700 | -3.65256800 |
| H | 2.27414200  | -1.74428900 | -4.24578700 |
| H | 1.61106800  | -4.00754300 | -4.90930900 |
| H | 0.51955900  | -4.15271600 | -3.43134800 |

|   |             |             |             |
|---|-------------|-------------|-------------|
| O | -6.64252400 | 0.76353500  | -1.33106000 |
| O | 1.49509500  | 5.33034200  | 1.16453500  |
| O | -0.29728700 | -3.36547700 | 4.84911300  |
| C | -7.60621900 | 0.74007900  | -0.28777300 |
| H | -8.56885400 | 0.93441300  | -0.76302100 |
| H | -7.64026800 | -0.23778500 | 0.21022700  |
| H | -7.41076000 | 1.51783100  | 0.46231400  |
| C | 0.69117100  | 6.49986200  | 1.14018800  |
| H | 1.34519500  | 7.32215900  | 1.43485000  |
| H | 0.29282400  | 6.69771200  | 0.13617200  |
| H | -0.14498700 | 6.43304200  | 1.84916000  |
| C | -0.25059900 | -2.74546400 | 6.12610600  |
| H | -0.16600600 | -3.55612500 | 6.85137100  |
| H | 0.61897400  | -2.08219500 | 6.22257300  |
| H | -1.16384300 | -2.17145400 | 6.33184900  |
| O | 5.74374200  | 0.30620000  | 0.71444900  |
| C | 6.54577900  | 1.37254500  | 0.23945500  |
| H | 5.97091600  | 2.30467900  | 0.14368500  |
| H | 7.33468900  | 1.51407400  | 0.98071100  |
| H | 7.00382700  | 1.13954900  | -0.73176700 |

(O) Bu<sub>3</sub>SnI

Total energy: -488.462274643 Hartree

Free energy: -488.151937 Hartree

|    |             |             |             |
|----|-------------|-------------|-------------|
| Sn | -0.42025900 | 0.00003400  | -0.00061800 |
| C  | 0.19718200  | -1.89411900 | -0.88407200 |
| H  | 0.02067800  | -2.68198800 | -0.14338100 |
| H  | -0.46763300 | -2.10097400 | -1.72932700 |
| C  | 0.20128400  | 0.18389900  | 2.08014300  |
| H  | 0.03004400  | 1.22096200  | 2.38952600  |
| H  | -0.46511500 | -0.44003700 | 2.68495800  |
| C  | 0.19707000  | 1.71175300  | -1.20010900 |
| H  | 0.02485500  | 1.46179400  | -2.25290500 |
| H  | -0.47057700 | 2.54605900  | -0.96051700 |
| C  | 1.66527200  | 2.10760200  | -0.96684300 |
| H  | 1.82622200  | 2.35165200  | 0.09278700  |

|   |             |             |             |
|---|-------------|-------------|-------------|
| H | 2.32992400  | 1.25958400  | -1.18555300 |
| C | 1.66713700  | -1.89199700 | -1.33787700 |
| H | 1.83273800  | -1.09476100 | -2.07631700 |
| H | 2.32890400  | -1.66119100 | -0.49082900 |
| C | 1.66996300  | -0.21606700 | 2.30318700  |
| H | 2.33318000  | 0.39584000  | 1.67510900  |
| H | 1.82953400  | -1.25644900 | 1.98635500  |
| C | 2.10940000  | -0.07316900 | 3.76810900  |
| H | 1.95653700  | 0.96647500  | 4.08712800  |
| H | 1.45234100  | -0.68616600 | 4.39922700  |
| C | 2.10050000  | 3.30741200  | -1.82153900 |
| H | 1.44203100  | 4.15862800  | -1.60324100 |
| H | 1.94602300  | 3.06561900  | -2.88157100 |
| C | 2.10195800  | -3.23133000 | -1.95161300 |
| H | 1.44627500  | -3.46428100 | -2.80109600 |
| H | 1.94312600  | -4.03015700 | -1.21497300 |
| C | 3.56421600  | -3.22880800 | -2.40836700 |
| H | 3.85088800  | -4.19231000 | -2.84180500 |
| H | 3.73916900  | -2.45657800 | -3.16637900 |
| H | 4.23933900  | -3.02634600 | -1.56882500 |
| C | 3.57028800  | -0.47608500 | 3.99232000  |
| H | 4.24687500  | 0.14346900  | 3.39231500  |
| H | 3.86032100  | -0.36590200 | 5.04214400  |
| H | 3.73935900  | -1.52092600 | 3.70729000  |
| C | 3.56100000  | 3.70575900  | -1.58688100 |
| H | 3.84789400  | 4.56170600  | -2.20610500 |
| H | 3.73160600  | 3.97964200  | -0.53931100 |
| H | 4.23892300  | 2.87831700  | -1.82645100 |
| I | -3.23494600 | -0.00080100 | 0.00271500  |

(P) Transition state for the reductive elimination

imaginary mode 269.56 i cm<sup>-1</sup>

Total energy: -3824.10954752 Hartree

Free energy: -3823.647260 Hartree

|    |             |            |             |
|----|-------------|------------|-------------|
| Pd | -0.68720600 | 0.32441000 | -2.40938200 |
| As | 0.79163300  | 0.12270300 | -0.45604700 |

|   |             |             |             |
|---|-------------|-------------|-------------|
| C | 2.12357200  | -1.29669200 | -0.48664700 |
| C | 3.26742000  | -1.28757100 | 0.31473400  |
| C | 1.90899200  | -2.39189500 | -1.34008600 |
| C | 4.18419900  | -2.34132000 | 0.27892700  |
| H | 3.45987300  | -0.44768000 | 0.97573100  |
| C | 2.80758700  | -3.44937400 | -1.38284300 |
| H | 1.02897500  | -2.41003800 | -1.97886100 |
| C | 3.95337900  | -3.43038400 | -0.57210900 |
| H | 5.06434800  | -2.30074000 | 0.90953700  |
| H | 2.65273300  | -4.29934800 | -2.03932300 |
| C | -0.30264400 | -0.38308200 | 1.07597300  |
| C | -1.39688300 | 0.43635200  | 1.39937200  |
| C | -0.12261500 | -1.57168100 | 1.78361500  |
| C | -2.29433100 | 0.06835100  | 2.38915200  |
| H | -1.57992100 | 1.34717600  | 0.83956600  |
| C | -1.02626600 | -1.96164300 | 2.77941900  |
| H | 0.71689500  | -2.22080300 | 1.55406600  |
| C | -2.12428100 | -1.14545700 | 3.07147300  |
| H | -3.16192100 | 0.67875000  | 2.61538600  |
| H | -0.86795800 | -2.89835900 | 3.30065000  |
| C | 1.79525200  | 1.63226900  | 0.24744500  |
| C | 2.35485200  | 2.55333200  | -0.65259600 |
| C | 1.98716800  | 1.83273700  | 1.61677600  |
| C | 3.09500400  | 3.63517900  | -0.19628800 |
| H | 2.19961800  | 2.42552700  | -1.72109900 |
| C | 2.72690200  | 2.91883500  | 2.09222700  |
| H | 1.54722400  | 1.14224500  | 2.33049300  |
| C | 3.28703800  | 3.82432800  | 1.18170300  |
| H | 3.52974700  | 4.35510100  | -0.88189600 |
| H | 2.85291000  | 3.04859000  | 3.16050100  |
| C | -2.64217300 | 0.35104300  | -1.81565300 |
| C | -3.18096500 | -0.84517500 | -1.32769200 |
| C | -3.22157500 | 1.56244300  | -1.39532600 |
| C | -4.19581400 | -0.84381400 | -0.36307800 |
| H | -2.78276100 | -1.79791000 | -1.66369500 |
| C | -4.23218500 | 1.57365700  | -0.44044800 |



|   |             |             |             |
|---|-------------|-------------|-------------|
| H | -2.86493600 | 2.50382800  | -1.80230700 |
| C | -4.70261500 | 0.37043900  | 0.10743200  |
| H | -4.54982200 | -1.78873000 | 0.03218500  |
| H | -4.66125600 | 2.50593000  | -0.08567400 |
| C | -2.29710300 | 1.35512200  | -4.66992000 |
| C | -2.07240700 | 0.28677600  | -3.88687300 |
| H | -2.35629000 | -0.70594500 | -4.24288300 |
| H | -2.69141300 | 1.25254100  | -5.68119200 |
| H | -2.11273000 | 2.37219900  | -4.33088300 |
| O | -3.09875700 | -1.44618500 | 3.98332100  |
| O | 4.02363100  | 4.91704600  | 1.52770200  |
| O | 4.77522700  | -4.51077900 | -0.68983000 |
| C | 5.95945100  | -4.54607700 | 0.09291800  |
| H | 5.73580100  | -4.53568100 | 1.16801200  |
| H | 6.45980900  | -5.48217900 | -0.15975900 |
| H | 6.62603000  | -3.70579500 | -0.14203700 |
| C | -2.99791600 | -2.67092700 | 4.69378000  |
| H | -3.86888100 | -2.71251800 | 5.34991700  |
| H | -3.01346400 | -3.53540800 | 4.01670400  |
| H | -2.08557200 | -2.71198800 | 5.30346100  |
| C | 4.23888900  | 5.17609800  | 2.90715400  |
| H | 4.83830400  | 6.08664900  | 2.95272600  |
| H | 3.29358600  | 5.33917400  | 3.44138500  |
| H | 4.78800900  | 4.35840100  | 3.39272800  |
| O | -5.63869600 | 0.49605600  | 1.10028300  |
| C | -6.01556200 | -0.67540200 | 1.80912400  |
| H | -6.72717400 | -0.34971500 | 2.57045100  |
| H | -6.50693000 | -1.40875300 | 1.15504500  |
| H | -5.15271600 | -1.14448200 | 2.30039900  |

(Q) The final product complex

Total energy: -3824.18681583 Hartree

Free energy: -3823.720296 Hartree

|    |             |             |             |
|----|-------------|-------------|-------------|
| Pd | -0.41830600 | -0.19003500 | -2.60383400 |
| As | 0.82462900  | -0.00468600 | -0.55933500 |
| C  | 1.94472300  | -1.51151200 | -0.03169900 |

|   |             |             |             |
|---|-------------|-------------|-------------|
| C | 3.08943800  | -1.37582000 | 0.75667000  |
| C | 1.57043900  | -2.79686200 | -0.45668000 |
| C | 3.84930300  | -2.48910200 | 1.12851900  |
| H | 3.40735000  | -0.39104500 | 1.08633300  |
| C | 2.31121000  | -3.91250200 | -0.09192000 |
| H | 0.69450800  | -2.91473800 | -1.08998900 |
| C | 3.45742100  | -3.76527600 | 0.70533600  |
| H | 4.73508500  | -2.34807400 | 1.73646900  |
| H | 2.03298500  | -4.90979600 | -0.41698300 |
| C | -0.34723700 | 0.17433500  | 0.99219600  |
| C | -1.53001300 | 0.91750900  | 0.84799300  |
| C | -0.07570100 | -0.41968900 | 2.22665300  |
| C | -2.40820400 | 1.07155400  | 1.91141000  |
| H | -1.78434700 | 1.34907800  | -0.11581800 |
| C | -0.96066500 | -0.28954000 | 3.30240700  |
| H | 0.82730600  | -1.00759900 | 2.36071900  |
| C | -2.13400900 | 0.45563000  | 3.14070600  |
| H | -3.33206300 | 1.62876200  | 1.80251500  |
| H | -0.72848800 | -0.77605100 | 4.24245200  |
| C | 2.04767000  | 1.49277300  | -0.30454100 |
| C | 2.82281300  | 1.91540500  | -1.39716500 |
| C | 2.19643900  | 2.15597900  | 0.91539100  |
| C | 3.72543800  | 2.96187300  | -1.26958800 |
| H | 2.71004700  | 1.42188600  | -2.35952000 |
| C | 3.09791000  | 3.21515000  | 1.05912500  |
| H | 1.59941900  | 1.85549500  | 1.77135600  |
| C | 3.86912000  | 3.61959200  | -0.03747200 |
| H | 4.32723100  | 3.29772600  | -2.10775500 |
| H | 3.18454000  | 3.71166200  | 2.01832000  |
| C | -3.31445100 | -0.57739600 | -2.07650800 |
| C | -3.65637500 | -1.40249100 | -0.99541900 |
| C | -3.87141100 | 0.71771800  | -2.10563800 |
| C | -4.48215000 | -0.96381300 | 0.03954300  |
| H | -3.23904300 | -2.40508700 | -0.94493200 |
| C | -4.69554700 | 1.16808500  | -1.08665200 |
| H | -3.63858200 | 1.38548900  | -2.92879000 |

|   |             |             |             |
|---|-------------|-------------|-------------|
| C | -4.99510900 | 0.33646900  | 0.00501000  |
| H | -4.68917400 | -1.62485700 | 0.87216500  |
| H | -5.11233500 | 2.17006100  | -1.10006600 |
| C | -1.89641300 | -0.39922400 | -4.21517200 |
| C | -2.37181200 | -1.07934900 | -3.09610400 |
| H | -2.20223800 | -2.15545800 | -3.05168000 |
| H | -1.44352400 | -0.96039500 | -5.02856100 |
| H | -2.24792100 | 0.59734800  | -4.47200900 |
| O | -3.08934700 | 0.62255500  | 4.10689100  |
| O | 4.77694700  | 4.63675000  | -0.01604600 |
| O | 4.11839000  | -4.91992800 | 1.00478800  |
| C | 5.29699100  | -4.83602100 | 1.79115100  |
| H | 5.09307500  | -4.41691400 | 2.78566800  |
| H | 5.65968900  | -5.85925100 | 1.90158500  |
| H | 6.07031200  | -4.23029700 | 1.30028000  |
| C | -2.87466100 | 0.02134100  | 5.37469100  |
| H | -3.74321900 | 0.27961700  | 5.98283100  |
| H | -2.79885000 | -1.07164500 | 5.29887100  |
| H | -1.96829300 | 0.40871600  | 5.85842800  |
| C | 4.95500000  | 5.35435100  | 1.19559500  |
| H | 5.71035600  | 6.11403300  | 0.98818700  |
| H | 4.02705600  | 5.84636600  | 1.51606700  |
| H | 5.31182800  | 4.70315800  | 2.00483700  |
| O | -5.76411900 | 0.90107500  | 0.98259000  |
| C | -6.02699100 | 0.13904200  | 2.15477900  |
| H | -6.65616800 | 0.76996600  | 2.78501900  |
| H | -6.56851300 | -0.78726800 | 1.92122600  |
| H | -5.10268200 | -0.09752700 | 2.69572600  |

(R) PdL

Total energy: -3399.93864822 Hartree

Free energy: -3399.627061 Hartree

|    |             |             |             |
|----|-------------|-------------|-------------|
| Pd | 0.00094700  | -0.00258800 | 3.27466000  |
| As | 0.00071200  | -0.00067400 | 0.94710100  |
| C  | -0.53944500 | 1.65968100  | 0.07502700  |
| C  | 0.01343900  | 2.09840900  | -1.13000000 |

|   |             |             |             |
|---|-------------|-------------|-------------|
| C | -1.53980000 | 2.43866700  | 0.67882300  |
| C | -0.41838500 | 3.28242400  | -1.73597700 |
| H | 0.79716000  | 1.52044700  | -1.61048200 |
| C | -1.98283700 | 3.61304000  | 0.08715100  |
| H | -1.96360800 | 2.12084500  | 1.62820900  |
| C | -1.42382600 | 4.04324500  | -1.12699300 |
| H | 0.03537800  | 3.59703300  | -2.66828600 |
| H | -2.75391400 | 4.22355000  | 0.54572700  |
| C | -1.16750200 | -1.29717400 | 0.07322800  |
| C | -1.34659600 | -2.55183200 | 0.67806600  |
| C | -1.82035500 | -1.03745600 | -1.13367600 |
| C | -2.14334500 | -3.52129800 | 0.08573100  |
| H | -0.86223100 | -2.76003400 | 1.62886800  |
| C | -2.63091500 | -2.00202700 | -1.74040400 |
| H | -1.70812800 | -0.07054900 | -1.61494300 |
| C | -2.79189500 | -3.25199900 | -1.13021600 |
| H | -2.29016900 | -4.49337600 | 0.54516100  |
| H | -3.12742000 | -1.76622200 | -2.67418600 |
| C | 1.70788300  | -0.36234200 | 0.07303500  |
| C | 2.88340100  | 0.11124300  | 0.67798300  |
| C | 1.81022900  | -1.05730000 | -1.13393100 |
| C | 4.12161200  | -0.09252300 | 0.08570500  |
| H | 2.82084700  | 0.63476100  | 1.62876700  |
| C | 3.05117100  | -1.27561600 | -1.74054100 |
| H | 0.91717800  | -1.44422300 | -1.61545300 |
| C | 4.21357000  | -0.78875400 | -1.13023600 |
| H | 5.03642400  | 0.26744500  | 0.54517500  |
| H | 3.09585500  | -1.82339400 | -2.67436100 |
| O | -3.55563800 | -4.26644000 | -1.62696000 |
| O | 5.47417600  | -0.94144700 | -1.62686000 |
| O | -1.92260900 | 5.21116400  | -1.62326300 |
| C | -1.38583000 | 5.70946400  | -2.83910300 |
| H | -1.54782300 | 5.01111000  | -3.67115600 |
| H | -1.91706300 | 6.64021600  | -3.04453100 |
| H | -0.31133200 | 5.91890400  | -2.75277400 |
| C | -4.25179300 | -4.05053100 | -2.84492900 |

|   |             |             |             |
|---|-------------|-------------|-------------|
| H | -4.79412700 | -4.97482100 | -3.05053100 |
| H | -4.96847700 | -3.22270700 | -2.76161400 |
| H | -3.56326100 | -3.84457200 | -3.67544200 |
| C | 5.63626100  | -1.65269400 | -2.84446600 |
| H | 6.70792100  | -1.65907200 | -3.04991800 |
| H | 5.27887100  | -2.68764200 | -2.76069400 |
| H | 5.11315700  | -1.16038700 | -3.67527100 |

(S) p-methoxystyrene (2)

Total energy: -424.191461370 Hartree

Free energy: -424.059966 Hartree

|   |             |             |             |
|---|-------------|-------------|-------------|
| C | -1.44959400 | -0.24023200 | -0.00021400 |
| C | -0.50827500 | -1.27902700 | -0.00006200 |
| C | -0.95383800 | 1.08081000  | -0.00033000 |
| C | 0.86704500  | -1.03684600 | 0.00009900  |
| H | -0.85683300 | -2.30904800 | -0.00002400 |
| C | 0.40623500  | 1.34017000  | -0.00017700 |
| H | -1.64517100 | 1.91778300  | -0.00060700 |
| C | 1.33175300  | 0.28243200  | 0.00006800  |
| H | 1.55464600  | -1.87406600 | 0.00023400  |
| H | 0.78732200  | 2.35620200  | -0.00029600 |
| C | -3.91642600 | 0.28646300  | 0.00056100  |
| C | -2.88270500 | -0.56558200 | -0.00029100 |
| H | -3.10289300 | -1.63338200 | -0.00110500 |
| H | -4.93862600 | -0.07733400 | 0.00038500  |
| H | -3.78992300 | 1.36525100  | 0.00152400  |
| O | 2.64558100  | 0.64883900  | 0.00006200  |
| C | 3.62721800  | -0.37606500 | 0.00015500  |
| H | 4.59363300  | 0.13069600  | 0.00017500  |
| H | 3.55231000  | -1.00972300 | 0.89407000  |
| H | 3.55240900  | -1.00982300 | -0.89370200 |

(2) Optimized geometries in Figure S20, obtained from B3LYP calculations without dispersion correction.

$L = \text{As}(\text{PhOMe})_3$  [1i]

(A)  $\text{PdL}_2$

Total energy: -6671.87761680 Hartree

Free energy: -6671.234361 Hartree

|    |             |             |             |
|----|-------------|-------------|-------------|
| Pd | 0.09857600  | 0.00190400  | 0.01039200  |
| As | 2.50537300  | 0.00158300  | 0.00383800  |
| C  | 3.38364700  | -0.69906600 | 1.60724600  |
| C  | 4.60687600  | -1.38732800 | 1.58349300  |
| C  | 2.75409800  | -0.50813100 | 2.84111400  |
| C  | 5.18432800  | -1.85793600 | 2.75710300  |
| H  | 5.11055700  | -1.56863000 | 0.63886600  |
| C  | 3.32342900  | -0.97036900 | 4.03011800  |
| H  | 1.79370400  | 0.00029300  | 2.87691100  |
| C  | 4.54758400  | -1.64919200 | 3.98968600  |
| H  | 6.12792600  | -2.39429300 | 2.74632000  |
| H  | 2.80484700  | -0.80500700 | 4.96719600  |
| C  | 3.37628000  | 1.74333000  | -0.19805500 |
| C  | 2.73641900  | 2.71445700  | -0.97441700 |
| C  | 4.60392100  | 2.07090300  | 0.39873200  |
| C  | 3.29982100  | 3.97714700  | -1.17367500 |
| H  | 1.77260200  | 2.48810900  | -1.42380000 |
| C  | 5.17560200  | 3.32450000  | 0.21440100  |
| H  | 5.11583300  | 1.34510100  | 1.02325900  |
| C  | 4.52848800  | 4.28552100  | -0.57680300 |
| H  | 2.77325100  | 4.70431800  | -1.78059600 |
| H  | 6.12261600  | 3.58637000  | 0.67565800  |
| C  | 3.36922300  | -1.04190600 | -1.40972300 |
| C  | 2.73314300  | -2.20610200 | -1.85172200 |
| C  | 4.58787700  | -0.68185100 | -2.00609300 |
| C  | 3.29170000  | -3.00919700 | -2.84894700 |
| H  | 1.77601900  | -2.48781500 | -1.41962900 |
| C  | 5.15454500  | -1.46738700 | -3.00321500 |
| H  | 5.09659200  | 0.22655700  | -1.69806500 |
| C  | 4.51144000  | -2.63929900 | -3.42899400 |
| H  | 2.76827800  | -3.90340300 | -3.16647000 |
| H  | 6.09457600  | -1.19344700 | -3.47168700 |
| As | -2.30330200 | 0.00083800  | 0.00698400  |
| C  | -3.18370800 | 0.92959800  | 1.48968500  |

|   |             |             |             |
|---|-------------|-------------|-------------|
| C | -4.38649700 | 0.50599400  | 2.05910600  |
| C | -2.56535500 | 2.07738900  | 2.01482100  |
| C | -4.97448400 | 1.20289900  | 3.12025800  |
| H | -4.87869800 | -0.38706200 | 1.68584100  |
| C | -3.13907500 | 2.78398500  | 3.06301400  |
| H | -1.61588800 | 2.40869500  | 1.60180500  |
| C | -4.35068000 | 2.35004100  | 3.62379500  |
| H | -5.90541700 | 0.84164600  | 3.54161800  |
| H | -2.66533100 | 3.66980800  | 3.47396600  |
| C | -3.17158000 | 0.82253900  | -1.54437200 |
| C | -4.37123900 | 1.53358400  | -1.46992900 |
| C | -2.54703500 | 0.69810300  | -2.79738000 |
| C | -4.95025800 | 2.10507400  | -2.60820200 |
| H | -4.86797400 | 1.66083500  | -0.51276100 |
| C | -3.11182300 | 1.25342000  | -3.93742400 |
| H | -1.59981100 | 0.16979300  | -2.87157200 |
| C | -4.32041600 | 1.96223500  | -3.84977200 |
| H | -5.87901300 | 2.65540500  | -2.51209200 |
| H | -2.63332300 | 1.16226100  | -4.90733300 |
| C | -3.17736800 | -1.75089600 | 0.06491300  |
| C | -4.37513200 | -2.03651100 | -0.59400000 |
| C | -2.56009400 | -2.77722400 | 0.80052300  |
| C | -4.95928400 | -3.30589800 | -0.52430500 |
| H | -4.86619000 | -1.26847100 | -1.18399400 |
| C | -3.13008100 | -4.04019500 | 0.88520500  |
| H | -1.61443500 | -2.58182200 | 1.29986800  |
| C | -4.33666700 | -4.31318000 | 0.22158200  |
| H | -5.88631600 | -3.49353400 | -1.05354900 |
| H | -2.65714600 | -4.83720500 | 1.45009900  |
| O | 5.17018500  | 5.48375600  | -0.69603900 |
| O | 5.14767600  | -3.34029600 | -4.41165800 |
| O | 5.19426700  | -2.14925100 | 5.08217200  |
| O | -4.81331000 | -5.58440100 | 0.35921000  |
| O | -4.79155700 | 2.47577300  | -5.02299100 |
| O | -4.83074700 | 3.10632400  | 4.65320300  |
| C | -6.02082900 | -5.92433600 | -0.30250900 |

|   |             |             |             |
|---|-------------|-------------|-------------|
| H | -5.93235600 | -5.81286500 | -1.39092500 |
| H | -6.21119800 | -6.97194300 | -0.06386400 |
| H | -6.86315800 | -5.31569200 | 0.05140800  |
| C | 4.54122300  | -4.53144300 | -4.88704100 |
| H | 5.20961600  | -4.92438700 | -5.65486200 |
| H | 4.43106300  | -5.27713100 | -4.08911700 |
| H | 3.55690100  | -4.33601100 | -5.33169500 |
| C | -6.00155400 | 3.21511000  | -4.99489200 |
| H | -5.91954000 | 4.10366800  | -4.35562300 |
| H | -6.18714300 | 3.52943600  | -6.02320700 |
| H | -6.84391200 | 2.60239100  | -4.64815300 |
| C | 4.56005600  | 6.49732300  | -1.47901300 |
| H | 5.23368200  | 7.35488500  | -1.44006700 |
| H | 4.43589700  | 6.18371000  | -2.52356900 |
| H | 3.58200700  | 6.78859200  | -1.07482300 |
| C | 4.59442800  | -1.97496200 | 6.35590800  |
| H | 5.27042700  | -2.44202700 | 7.07394700  |
| H | 4.47861600  | -0.91295300 | 6.60809300  |
| H | 3.61374000  | -2.46465700 | 6.41288600  |
| C | -6.04378200 | 2.70792500  | 5.27072600  |
| H | -5.96205400 | 1.70934200  | 5.71913600  |
| H | -6.23642300 | 3.43925300  | 6.05731600  |
| H | -6.88153100 | 2.71320300  | 4.56124600  |

(B) Ar-X (p-iodoanisole)

Total energy: -357.584630669Hartree

Free energy: -357.497083 Hartree

|   |             |             |             |
|---|-------------|-------------|-------------|
| C | -0.18260700 | 0.07515900  | -0.00013700 |
| C | 0.41886700  | 1.33582000  | -0.00008900 |
| C | 0.58935500  | -1.08037600 | -0.00027900 |
| C | 1.80579500  | 1.43077300  | -0.00008500 |
| H | -0.18262000 | 2.23777500  | -0.00004100 |
| C | 1.98540400  | -0.98484200 | -0.00034000 |
| H | 0.12302900  | -2.05917600 | -0.00034800 |
| C | 2.59864300  | 0.27317400  | -0.00018800 |
| H | 2.29779500  | 2.39784800  | 0.00002600  |



|   |             |             |             |
|---|-------------|-------------|-------------|
| H | 2.57249100  | -1.89540000 | -0.00047100 |
| I | -2.33197600 | -0.07730200 | 0.00007000  |
| O | 3.94552900  | 0.48009500  | -0.00008700 |
| C | 4.80061900  | -0.65296900 | 0.00045500  |
| H | 5.81881500  | -0.26146700 | 0.00086600  |
| H | 4.65182900  | -1.27177600 | 0.89465200  |
| H | 4.65272000  | -1.27202100 | -0.89373400 |

(C)The transition state for the oxidative addition by PdL<sub>2</sub>

imaginary mode 90.1 i cm<sup>-1</sup>

Total energy: -7029.45030694 Hartree

Free energy: -7028.698173 Hartree

|    |             |             |             |
|----|-------------|-------------|-------------|
| Pd | -0.07719100 | -0.94559500 | -0.58126600 |
| As | 2.05062800  | 0.30893800  | 0.03396700  |
| C  | 2.25213100  | 1.01654200  | 1.85639700  |
| C  | 3.48984400  | 1.20371300  | 2.47855800  |
| C  | 1.09310500  | 1.36282800  | 2.57136100  |
| C  | 3.58401600  | 1.71713000  | 3.77634900  |
| H  | 4.40466600  | 0.93912700  | 1.95790700  |
| C  | 1.16929500  | 1.88110200  | 3.85735100  |
| H  | 0.11823000  | 1.22930600  | 2.11335400  |
| C  | 2.41837900  | 2.05955400  | 4.47122700  |
| H  | 4.56170400  | 1.84179000  | 4.22737100  |
| H  | 0.27439500  | 2.15347600  | 4.40754400  |
| C  | 2.23981300  | 1.95466700  | -1.02382700 |
| C  | 1.64496100  | 2.00805800  | -2.29599300 |
| C  | 2.92996200  | 3.08098400  | -0.56863800 |
| C  | 1.74357900  | 3.14736700  | -3.08678600 |
| H  | 1.09123500  | 1.14894500  | -2.66589600 |
| C  | 3.03454500  | 4.23605300  | -1.34913500 |
| H  | 3.39003200  | 3.07488900  | 0.41476700  |
| C  | 2.44088400  | 4.27059400  | -2.61738400 |
| H  | 1.28631900  | 3.19230400  | -4.07014100 |
| H  | 3.57555000  | 5.09165400  | -0.96148400 |
| C  | 3.83372600  | -0.48150200 | -0.22058800 |
| C  | 4.23447500  | -1.55173300 | 0.60069000  |

|    |             |             |             |
|----|-------------|-------------|-------------|
| C  | 4.69572800  | -0.08228300 | -1.24435100 |
| C  | 5.45572400  | -2.18497100 | 0.41277400  |
| H  | 3.58251000  | -1.89548600 | 1.39897500  |
| C  | 5.92422500  | -0.71862000 | -1.45584300 |
| H  | 4.41760000  | 0.73890400  | -1.89725300 |
| C  | 6.31045000  | -1.77353400 | -0.62265000 |
| H  | 5.77056200  | -3.00530800 | 1.05007300  |
| As | -2.26257700 | 0.13995700  | 0.06803800  |
| C  | -3.74838900 | 0.22174000  | -1.21014800 |
| C  | -4.71263500 | 1.23339200  | -1.19516800 |
| C  | -3.85406500 | -0.78300900 | -2.18632100 |
| C  | -5.76659700 | 1.24804600  | -2.11416300 |
| H  | -4.64904700 | 2.03385200  | -0.46443300 |
| C  | -4.89742000 | -0.78576500 | -3.10275600 |
| H  | -3.09769900 | -1.56004800 | -2.24411200 |
| C  | -5.86386200 | 0.23121800  | -3.07140600 |
| H  | -6.49408900 | 2.05042100  | -2.07408600 |
| H  | -4.98024300 | -1.55821700 | -3.86052900 |
| C  | -3.10774100 | -0.76769500 | 1.58654000  |
| C  | -2.27976700 | -1.37951000 | 2.53364800  |
| C  | -4.49749700 | -0.84408900 | 1.77236400  |
| C  | -2.80565200 | -2.03619500 | 3.64942400  |
| H  | -1.20177300 | -1.35692000 | 2.39535000  |
| C  | -5.03697700 | -1.49933900 | 2.87311000  |
| H  | -5.16748000 | -0.39348600 | 1.04664200  |
| C  | -4.19372300 | -2.09612000 | 3.82269000  |
| H  | -2.13076900 | -2.49605900 | 4.36182000  |
| H  | -6.11035600 | -1.56460100 | 3.02078000  |
| C  | -2.24381800 | 1.99956100  | 0.70107700  |
| C  | -1.48384800 | 2.93154600  | -0.01399600 |
| C  | -2.93424500 | 2.44006000  | 1.84132500  |
| C  | -1.41278100 | 4.27019900  | 0.37721700  |
| H  | -0.92122500 | 2.61571200  | -0.88831400 |
| C  | -2.86807600 | 3.76855700  | 2.24777700  |
| H  | -3.52527400 | 1.73988500  | 2.42341800  |
| C  | -2.10861800 | 4.69362300  | 1.51643900  |

|   |             |             |             |
|---|-------------|-------------|-------------|
| H | -0.80756200 | 4.95808900  | -0.20115600 |
| H | -3.39667300 | 4.11510500  | 3.13028000  |
| C | 0.42585300  | -2.93456500 | -1.14032000 |
| C | -0.66765100 | -3.63047300 | -0.60017600 |
| C | 1.73569100  | -3.40567500 | -0.91514400 |
| C | -0.45156400 | -4.70423500 | 0.28020800  |
| H | -1.68127300 | -3.36600100 | -0.87537100 |
| C | 1.94073500  | -4.47350000 | -0.05720400 |
| H | 2.57980200  | -2.91778900 | -1.38651700 |
| C | 0.85071500  | -5.12384300 | 0.55462300  |
| H | -1.30993600 | -5.21110300 | 0.70494600  |
| H | 2.94427100  | -4.82655000 | 0.15811700  |
| O | -2.10817800 | 5.97113900  | 1.99591400  |
| O | -4.81998400 | -2.71119200 | 4.86729300  |
| O | -6.84643200 | 0.14448400  | -4.01368100 |
| O | 1.17716100  | -6.16834000 | 1.37403700  |
| O | 2.39025600  | 2.56619300  | 5.73818400  |
| O | 2.47949200  | 5.34158100  | -3.46267600 |
| C | -7.84384400 | 1.15254000  | -4.03952700 |
| H | -7.41340300 | 2.14455300  | -4.22805900 |
| H | -8.51515200 | 0.89164400  | -4.85923600 |
| H | -8.41475500 | 1.18304300  | -3.10236100 |
| C | -4.01841400 | -3.32763300 | 5.86222200  |
| H | -3.36115300 | -2.60323500 | 6.36021200  |
| H | -4.71279200 | -3.74395700 | 6.59376400  |
| H | -3.40584800 | -4.13766600 | 5.44550100  |
| C | -1.34415500 | 6.94637800  | 1.30499700  |
| H | -1.69288700 | 7.07864100  | 0.27258100  |
| H | -1.48200000 | 7.88041300  | 1.85217000  |
| H | -0.27701200 | 6.68991400  | 1.29145000  |
| C | 3.62345100  | 2.76159000  | 6.41069700  |
| H | 3.37121500  | 3.16506300  | 7.39269700  |
| H | 4.17044000  | 1.81841300  | 6.53830400  |
| H | 4.26583900  | 3.47758100  | 5.88161600  |
| C | 3.18629600  | 6.49932900  | -3.04947800 |
| H | 3.09843000  | 7.21507700  | -3.86841600 |

|   |             |             |             |
|---|-------------|-------------|-------------|
| H | 2.75345400  | 6.93762900  | -2.14056300 |
| H | 4.24787700  | 6.28494300  | -2.87048000 |
| C | 0.12256700  | -6.88254200 | 1.99488600  |
| H | -0.53722200 | -7.35634100 | 1.25616500  |
| H | 0.59615900  | -7.65701500 | 2.60070300  |
| H | -0.47977700 | -6.23370900 | 2.64470900  |
| I | 0.03095400  | -1.97531200 | -3.30309900 |
| H | 6.56320400  | -0.38017400 | -2.26314800 |
| O | 7.48384600  | -2.46173100 | -0.73031300 |
| C | 8.37590700  | -2.10646000 | -1.77459800 |
| H | 7.91601500  | -2.23744800 | -2.76251200 |
| H | 8.72310300  | -1.06958100 | -1.67675300 |
| H | 9.22971600  | -2.77986300 | -1.68420900 |

(D) Ar-PdL<sub>2</sub>-I

Total energy: -7029.48545279 Hartree

Free energy: -7028.729828□Hartree

|    |             |             |             |
|----|-------------|-------------|-------------|
| Pd | 0.42468900  | -1.33976000 | 0.05164600  |
| As | -2.02208400 | -0.52140200 | -0.20777000 |
| C  | -2.61422900 | 0.82682300  | 1.08227300  |
| C  | -3.46420500 | 1.88652000  | 0.75795000  |
| C  | -2.15511800 | 0.72009600  | 2.40705300  |
| C  | -3.85399000 | 2.82545100  | 1.71860400  |
| H  | -3.82732400 | 1.99915700  | -0.25870000 |
| C  | -2.53590900 | 1.64262000  | 3.37335900  |
| H  | -1.48940200 | -0.09233500 | 2.68415500  |
| C  | -3.38995500 | 2.70377500  | 3.03472200  |
| H  | -4.51609200 | 3.63444000  | 1.43208800  |
| H  | -2.18240700 | 1.56503900  | 4.39628800  |
| C  | -3.47926200 | -1.82054000 | -0.08413800 |
| C  | -3.46465300 | -2.93791500 | -0.93660600 |
| C  | -4.54494600 | -1.67418700 | 0.80293200  |
| C  | -4.49316300 | -3.86708100 | -0.91063100 |
| H  | -2.63453100 | -3.09176100 | -1.61898800 |
| C  | -5.58385600 | -2.61116100 | 0.85040400  |
| H  | -4.58139300 | -0.82537800 | 1.47756700  |

|    |             |             |             |
|----|-------------|-------------|-------------|
| C  | -5.56120400 | -3.71155500 | -0.01190200 |
| H  | -4.48551600 | -4.73396100 | -1.56308600 |
| H  | -6.39304500 | -2.46877300 | 1.55695900  |
| C  | -2.47478200 | 0.27527900  | -1.93963000 |
| C  | -1.46304500 | 0.79451600  | -2.76259400 |
| C  | -3.79230500 | 0.31577500  | -2.40936000 |
| C  | -1.75724700 | 1.34791500  | -4.00198700 |
| H  | -0.43170300 | 0.76499300  | -2.43048500 |
| C  | -4.10605900 | 0.86946000  | -3.65310900 |
| H  | -4.59371400 | -0.10394500 | -1.80951600 |
| C  | -3.08362900 | 1.39033800  | -4.45638800 |
| H  | -0.97633600 | 1.75239500  | -4.63741300 |
| As | 1.66054400  | 0.81860100  | 0.01314700  |
| C  | 1.89772400  | 1.34606400  | 1.87851500  |
| C  | 2.29168600  | 2.63968800  | 2.23684500  |
| C  | 1.65522500  | 0.41418300  | 2.90153000  |
| C  | 2.46329400  | 3.00183900  | 3.57499000  |
| H  | 2.45835600  | 3.38997300  | 1.47006100  |
| C  | 1.81969900  | 0.76034300  | 4.23647000  |
| H  | 1.31998000  | -0.58779600 | 2.64729200  |
| C  | 2.23018000  | 2.05687600  | 4.58306800  |
| H  | 2.76909100  | 4.01311600  | 3.81583000  |
| H  | 1.63261200  | 0.04413500  | 5.03001600  |
| C  | 3.46434600  | 0.83567300  | -0.73668200 |
| C  | 3.67652700  | 0.25256000  | -1.98909100 |
| C  | 4.55175700  | 1.43875500  | -0.08782800 |
| C  | 4.93312700  | 0.27383300  | -2.59826300 |
| H  | 2.86128800  | -0.25160000 | -2.49830800 |
| C  | 5.80897700  | 1.46125100  | -0.67781000 |
| H  | 4.42509000  | 1.88498900  | 0.89250800  |
| C  | 6.00905500  | 0.88008000  | -1.93904700 |
| H  | 5.06106500  | -0.19851000 | -3.56467000 |
| H  | 6.65664500  | 1.91936700  | -0.17840400 |
| C  | 0.95862300  | 2.49331800  | -0.73975100 |
| C  | -0.13018100 | 3.12907400  | -0.13430500 |
| C  | 1.49387500  | 3.05894600  | -1.90819200 |

|   |             |             |             |
|---|-------------|-------------|-------------|
| C | -0.68170400 | 4.29488600  | -0.66982200 |
| H | -0.56212600 | 2.72530200  | 0.77516100  |
| C | 0.95188600  | 4.21574900  | -2.45489700 |
| H | 2.34699100  | 2.59846500  | -2.39526000 |
| C | -0.14218500 | 4.84229000  | -1.84020100 |
| H | -1.52558500 | 4.75470200  | -0.16960900 |
| H | 1.36465800  | 4.65910700  | -3.35541800 |
| C | 2.25199400  | -2.24621500 | -0.08107800 |
| C | 3.23747800  | -2.30845100 | 0.90330500  |
| C | 2.50562400  | -2.88146100 | -1.30840800 |
| C | 4.45800500  | -2.96206400 | 0.67674700  |
| H | 3.07744900  | -1.85869200 | 1.87806400  |
| C | 3.71309800  | -3.53262300 | -1.54849100 |
| H | 1.74832800  | -2.88918400 | -2.08859100 |
| C | 4.70114600  | -3.57273400 | -0.55578900 |
| H | 5.19625900  | -2.98675800 | 1.47052100  |
| H | 3.90472300  | -4.03013500 | -2.49482300 |
| O | -0.59829000 | 5.97200800  | -2.45113900 |
| O | 7.27766700  | 0.95250400  | -2.43026600 |
| O | 2.36398400  | 2.29911200  | 5.91571700  |
| O | 5.85738900  | -4.23325200 | -0.88895100 |
| O | -3.70404000 | 3.55801500  | 4.04957500  |
| O | -6.51998800 | -4.68042900 | -0.06018500 |
| C | 2.77701100  | 3.59260200  | 6.33030200  |
| H | 2.05985400  | 4.36436500  | 6.02285400  |
| H | 2.82216100  | 3.55862400  | 7.41972400  |
| H | 3.76915600  | 3.84624400  | 5.93578900  |
| C | 7.55031700  | 0.33971600  | -3.68205500 |
| H | 6.96778900  | 0.79701400  | -4.49218200 |
| H | 8.61279500  | 0.50090000  | -3.87047400 |
| H | 7.34634300  | -0.73795000 | -3.65670900 |
| C | -1.71636200 | 6.63773400  | -1.88598800 |
| H | -1.50516400 | 6.99353800  | -0.86920400 |
| H | -1.91437100 | 7.49496900  | -2.53125600 |
| H | -2.60272100 | 5.99090600  | -1.86256400 |
| C | -4.57906200 | 4.64001000  | 3.77389400  |

|   |             |             |             |
|---|-------------|-------------|-------------|
| H | -4.69892200 | 5.17818500  | 4.71533200  |
| H | -4.15896400 | 5.32023300  | 3.02143200  |
| H | -5.56124300 | 4.29021400  | 3.43098100  |
| C | -7.59457000 | -4.60746000 | 0.86231500  |
| H | -8.21895200 | -5.48103700 | 0.66814200  |
| H | -7.23964400 | -4.64072700 | 1.90028900  |
| H | -8.19331100 | -3.69834300 | 0.71811100  |
| C | 6.86141200  | -4.34709300 | 0.10166000  |
| H | 6.49987000  | -4.88349100 | 0.98928400  |
| H | 7.67491900  | -4.91647500 | -0.35261100 |
| H | 7.24209700  | -3.36475300 | 0.41369900  |
| I | -0.38707700 | -3.70791500 | 1.09886800  |
| H | -5.13782000 | 0.87824100  | -3.98459100 |
| O | -3.27213400 | 1.94852700  | -5.68536800 |
| C | -4.58964400 | 1.99197300  | -6.21096100 |
| H | -5.25884100 | 2.59093500  | -5.57975700 |
| H | -4.50705400 | 2.46214400  | -7.19201800 |
| H | -5.01267100 | 0.98607800  | -6.32731800 |

(E) L

Total energy: -3271.93908835 Hartree

Free energy: -3271.625358 Hartree

|    |             |             |             |
|----|-------------|-------------|-------------|
| As | 0.00015000  | 0.00032300  | 1.47566400  |
| C  | -0.44315100 | -1.68246700 | 0.56325300  |
| C  | -1.19257000 | -1.77145900 | -0.62115600 |
| C  | -0.01352200 | -2.87494500 | 1.15515500  |
| C  | -1.48619800 | -3.00256300 | -1.19587900 |
| H  | -1.55411200 | -0.86689600 | -1.10020500 |
| C  | -0.29328400 | -4.12184600 | 0.58969300  |
| H  | 0.55336000  | -2.84128000 | 2.08261200  |
| C  | -1.03585400 | -4.18763400 | -0.59526600 |
| H  | -2.06526500 | -3.07410400 | -2.11125800 |
| H  | 0.06172300  | -5.02099500 | 1.07958900  |
| C  | 1.67907700  | 0.45777800  | 0.56304500  |
| C  | 2.49607700  | 1.42753600  | 1.15384800  |
| C  | 2.13194000  | -0.14848400 | -0.62005300 |

|   |             |             |             |
|---|-------------|-------------|-------------|
| C | 3.71597300  | 1.80840400  | 0.58855700  |
| H | 2.18266000  | 1.90298300  | 2.08033900  |
| C | 3.34512400  | 0.21244100  | -1.19456000 |
| H | 1.53011400  | -0.91507100 | -1.09815200 |
| C | 4.14534400  | 1.19640500  | -0.59506000 |
| H | 4.31646500  | 2.56653900  | 1.07757800  |
| H | 3.69750200  | -0.25467900 | -2.10888000 |
| C | -1.23575300 | 1.22543700  | 0.56330000  |
| C | -2.48444600 | 1.44707400  | 1.15373000  |
| C | -0.93719800 | 1.92142400  | -0.61942800 |
| C | -3.42461600 | 2.31266300  | 0.58838900  |
| H | -2.73949600 | 0.93741900  | 2.07994100  |
| C | -1.85675300 | 2.79115800  | -1.19399500 |
| H | 0.02787200  | 1.78444200  | -1.09724200 |
| C | -3.10937900 | 2.99107900  | -0.59492600 |
| H | -4.38167900 | 2.45281300  | 1.07714300  |
| H | -1.62842800 | 3.33035400  | -2.10804700 |
| O | 5.31693900  | 1.47960800  | -1.23536100 |
| O | -3.94086500 | 3.86365000  | -1.23530300 |
| O | -1.37570000 | -5.34384800 | -1.23596700 |
| C | -0.94742400 | -6.57368600 | -0.67393800 |
| H | -1.31933600 | -7.35506400 | -1.33864400 |
| H | 0.14725800  | -6.63655100 | -0.62114700 |
| H | -1.36282000 | -6.72760800 | 0.33047100  |
| C | -5.22116900 | 4.10522200  | -0.67471900 |
| H | -5.71176200 | 4.81858200  | -1.33890400 |
| H | -5.82197100 | 3.18784800  | -0.62439000 |
| H | -5.14873000 | 4.54027800  | 0.33054800  |
| C | 6.16723200  | 2.46642600  | -0.67412200 |
| H | 7.03048800  | 2.53407800  | -1.33813600 |
| H | 5.67417900  | 3.44591100  | -0.62335400 |
| H | 6.50732800  | 2.18528400  | 0.33105300  |

(F) Ar-PdI-L

Total energy: -3757.51708224 Hartree

Free energy: -3757.101510 Hartree



|    |             |             |             |
|----|-------------|-------------|-------------|
| Pd | 1.60564800  | -0.10368500 | -0.10202300 |
| As | -0.91365200 | 0.20336500  | -0.00590100 |
| C  | -1.99260100 | -0.85160900 | -1.23570800 |
| C  | -3.31113900 | -1.21790900 | -0.95459000 |
| C  | -1.42420600 | -1.26750400 | -2.45125300 |
| C  | -4.06264800 | -1.96971800 | -1.86178100 |
| H  | -3.76635100 | -0.92829700 | -0.01221800 |
| C  | -2.15940600 | -2.01110100 | -3.36390900 |
| H  | -0.39001100 | -1.02305400 | -2.67628900 |
| C  | -3.48648000 | -2.36687700 | -3.07511500 |
| H  | -5.08090700 | -2.24209600 | -1.61047500 |
| H  | -1.72550300 | -2.34235700 | -4.30158100 |
| C  | -1.46896600 | 2.03549900  | -0.39679800 |
| C  | -0.71949400 | 3.09238600  | 0.15075000  |
| C  | -2.55496800 | 2.34967200  | -1.21661200 |
| C  | -1.05039000 | 4.41513000  | -0.10651100 |
| H  | 0.13671000  | 2.87852400  | 0.78656900  |
| C  | -2.89837300 | 3.67753200  | -1.49025500 |
| H  | -3.14652800 | 1.55492000  | -1.66021900 |
| C  | -2.14530900 | 4.71749900  | -0.93260900 |
| H  | -0.47467900 | 5.23389700  | 0.31261800  |
| H  | -3.74491700 | 3.88382300  | -2.13453400 |
| C  | -1.75903000 | -0.13055800 | 1.71910100  |
| C  | -1.30694600 | -1.21515300 | 2.49210500  |
| C  | -2.79126400 | 0.66547900  | 2.22108400  |
| C  | -1.88017300 | -1.49485200 | 3.72468700  |
| H  | -0.49662900 | -1.84099600 | 2.12780900  |
| C  | -3.37479400 | 0.39634200  | 3.46293300  |
| H  | -3.14878100 | 1.51656300  | 1.64938100  |
| C  | -2.91959200 | -0.69042800 | 4.21926000  |
| H  | -1.53703600 | -2.32873000 | 4.32835800  |
| H  | -4.17063700 | 1.03635100  | 3.82537100  |
| C  | 3.57003500  | 0.02571200  | -0.17431600 |
| C  | 4.20429000  | 0.19404200  | -1.41726300 |
| C  | 4.28365200  | 0.26661600  | 1.00454900  |
| C  | 5.49170000  | 0.71800700  | -1.47423100 |

|   |             |             |             |
|---|-------------|-------------|-------------|
| H | 3.69255600  | -0.07147100 | -2.33770000 |
| C | 5.57926700  | 0.79477000  | 0.95191900  |
| H | 3.83705000  | 0.05318300  | 1.97138800  |
| C | 6.18290100  | 1.02600200  | -0.29101800 |
| H | 5.99196400  | 0.88092600  | -2.42378700 |
| H | 6.10573500  | 0.99931200  | 1.87701200  |
| O | -2.38679100 | 6.04300500  | -1.12998300 |
| O | -4.12219700 | -3.09997300 | -4.03040200 |
| O | -3.41153400 | -1.04513700 | 5.43902200  |
| C | -5.45510000 | -3.52111600 | -3.78330300 |
| H | -5.75666600 | -4.09466700 | -4.66092200 |
| H | -5.51856600 | -4.16121900 | -2.89428400 |
| H | -6.13367500 | -2.66715800 | -3.66028800 |
| C | -3.46903500 | 6.41403000  | -1.97090100 |
| H | -3.47304500 | 7.50469800  | -1.99196400 |
| H | -3.33671100 | 6.03350300  | -2.99160000 |
| H | -4.42899100 | 6.05733800  | -1.57617700 |
| C | -4.45633300 | -0.26439900 | 5.99851700  |
| H | -4.68915100 | -0.71963500 | 6.96222700  |
| H | -4.14430200 | 0.77584900  | 6.15684100  |
| H | -5.35428500 | -0.27730900 | 5.36741600  |
| I | 1.97313000  | -2.72386000 | 0.00489200  |
| O | 7.44239200  | 1.52481100  | -0.45899600 |
| C | 8.20976700  | 1.81721000  | 0.69738600  |
| H | 9.16750700  | 2.19523800  | 0.33612600  |
| H | 7.73077700  | 2.58519000  | 1.31878900  |
| H | 8.38273200  | 0.92085600  | 1.30682900  |

(G) Transition state for the isomerization

(TS connecting between Ar-PdI-L and Ar-PdL-I)

imaginary mode 62.6 i cm<sup>-1</sup>

Total energy: -3757.51174141 Hartree

Free energy: -3757.097434Hartree

|    |             |             |             |
|----|-------------|-------------|-------------|
| Pd | 1.45487200  | -0.83301100 | 0.05040700  |
| As | -0.97890000 | 0.08855700  | 0.00896600  |
| C  | -2.30226600 | -1.03192500 | -0.88182400 |

|   |             |             |             |
|---|-------------|-------------|-------------|
| C | -3.63849300 | -1.08726100 | -0.47821100 |
| C | -1.89248200 | -1.82781500 | -1.96531300 |
| C | -4.56002900 | -1.90429200 | -1.13930300 |
| H | -3.97567500 | -0.49687000 | 0.36832000  |
| C | -2.79756000 | -2.63975000 | -2.63395100 |
| H | -0.85197300 | -1.82260600 | -2.27901300 |
| C | -4.14034000 | -2.68313500 | -2.22511300 |
| H | -5.58831100 | -1.92814700 | -0.79830700 |
| H | -2.48824400 | -3.26145700 | -3.46762200 |
| C | -1.16147100 | 1.79921400  | -0.91018000 |
| C | -0.13698000 | 2.75158600  | -0.76873200 |
| C | -2.26041400 | 2.11695000  | -1.71138600 |
| C | -0.21636300 | 3.98450000  | -1.40045000 |
| H | 0.73740300  | 2.52276900  | -0.16459700 |
| C | -2.35177700 | 3.35283700  | -2.35884600 |
| H | -3.05911400 | 1.39441400  | -1.84807900 |
| C | -1.32711700 | 4.29414900  | -2.20226000 |
| H | 0.57169400  | 4.72325800  | -1.29746600 |
| H | -3.21566300 | 3.56452200  | -2.97781400 |
| C | -1.80103300 | 0.44196800  | 1.74096300  |
| C | -1.53761200 | -0.44306600 | 2.80116100  |
| C | -2.63157900 | 1.53949800  | 1.97872200  |
| C | -2.09775200 | -0.24060400 | 4.05442000  |
| H | -0.88103500 | -1.29523500 | 2.64497500  |
| C | -3.19851200 | 1.75958900  | 3.23768700  |
| H | -2.83939400 | 2.24611000  | 1.18097400  |
| C | -2.93365400 | 0.86495800  | 4.28182200  |
| H | -1.89784600 | -0.91816900 | 4.87804300  |
| H | -3.83380200 | 2.62419100  | 3.38978300  |
| C | 3.29971300  | -0.16522800 | 0.14300500  |
| C | 3.95824800  | 0.19942500  | -1.03093600 |
| C | 3.82287600  | 0.19198000  | 1.39331200  |
| C | 5.08504500  | 1.03022000  | -0.96733200 |
| H | 3.60214600  | -0.14474800 | -1.99640600 |
| C | 4.94287100  | 1.01677400  | 1.45470900  |
| H | 3.35861600  | -0.15738600 | 2.30991500  |

|   |             |             |             |
|---|-------------|-------------|-------------|
| C | 5.57603800  | 1.44383100  | 0.27692100  |
| H | 5.57202700  | 1.32606000  | -1.88925200 |
| H | 5.35601100  | 1.32819200  | 2.40896600  |
| I | 2.58494000  | -3.19579000 | 0.01692500  |
| O | 6.67028900  | 2.24324100  | 0.45255500  |
| C | 7.38178700  | 2.66731800  | -0.69801700 |
| H | 8.20906300  | 3.27848600  | -0.33345600 |
| H | 7.78415500  | 1.81653500  | -1.26314100 |
| H | 6.75343900  | 3.27325900  | -1.36426300 |
| O | -3.42841600 | 0.98010600  | 5.54494200  |
| O | -1.30966900 | 5.52493800  | -2.78409800 |
| O | -4.94794400 | -3.51344400 | -2.94005500 |
| C | -6.31072000 | -3.62563500 | -2.55791600 |
| H | -6.75882700 | -4.34019900 | -3.24970400 |
| H | -6.41314600 | -4.00269300 | -1.53253700 |
| H | -6.83511900 | -2.66508500 | -2.64183400 |
| C | -2.39528200 | 5.89113100  | -3.62285400 |
| H | -2.17279100 | 6.89754200  | -3.98009500 |
| H | -2.48807500 | 5.21506800  | -4.48219400 |
| H | -3.34482700 | 5.90543700  | -3.07269000 |
| C | -4.26530600 | 2.08710700  | 5.84468300  |
| H | -4.53615000 | 1.98299300  | 6.89624900  |
| H | -3.74200500 | 3.04064500  | 5.69923200  |
| H | -5.17787200 | 2.08142600  | 5.23495200  |

(H) Ar-PdL-X

Total energy: -3757.52742306 Hartree

Free energy: -3757.109301 Hartree

|    |             |             |             |
|----|-------------|-------------|-------------|
| Pd | 0.12109800  | -1.97363000 | -0.18812500 |
| As | -0.33070900 | 0.33809300  | -0.00021100 |
| C  | -2.18834400 | 0.69916000  | -0.45215200 |
| C  | -2.87129800 | 1.76083600  | 0.14856500  |
| C  | -2.85548700 | -0.08692100 | -1.40517800 |
| C  | -4.19433200 | 2.04844800  | -0.19150200 |
| H  | -2.38024800 | 2.37322500  | 0.89854200  |
| C  | -4.16876400 | 0.19391700  | -1.75579500 |

|   |             |             |             |
|---|-------------|-------------|-------------|
| H | -2.35685300 | -0.93979300 | -1.85497300 |
| C | -4.84846100 | 1.26323300  | -1.15094000 |
| H | -4.69988200 | 2.87315100  | 0.29649500  |
| H | -4.69655100 | -0.41353200 | -2.48328600 |
| C | 0.64673100  | 1.64243600  | -1.06325200 |
| C | 2.01674300  | 1.87396000  | -0.83987700 |
| C | 0.00370300  | 2.35488000  | -2.07877400 |
| C | 2.71040000  | 2.80031700  | -1.60425000 |
| H | 2.54597100  | 1.32665000  | -0.06734200 |
| C | 0.69564700  | 3.28178300  | -2.86279900 |
| H | -1.05186600 | 2.19482100  | -2.27111700 |
| C | 2.05609000  | 3.50988800  | -2.62527300 |
| H | 3.76573000  | 2.98828500  | -1.43643500 |
| H | 0.16569900  | 3.81396600  | -3.64363300 |
| C | -0.15833300 | 0.97009700  | 1.82653300  |
| C | -0.50204100 | 0.10006400  | 2.87646800  |
| C | 0.26364100  | 2.26527200  | 2.13476300  |
| C | -0.42583400 | 0.51973400  | 4.19610900  |
| H | -0.82579700 | -0.91382700 | 2.65590800  |
| C | 0.34710700  | 2.69886100  | 3.46098400  |
| H | 0.54186700  | 2.95192700  | 1.34166400  |
| C | 0.00089600  | 1.82426000  | 4.49866600  |
| H | -0.68656500 | -0.14385400 | 5.01396300  |
| H | 0.68225700  | 3.70811100  | 3.66823500  |
| C | 2.04096200  | -1.45355100 | -0.06619900 |
| C | 2.80548600  | -1.51968400 | -1.23518200 |
| C | 2.69036300  | -1.27659700 | 1.16570500  |
| C | 4.20425500  | -1.47260400 | -1.18115800 |
| H | 2.32333500  | -1.62070200 | -2.20381500 |
| C | 4.08181000  | -1.22247700 | 1.22568500  |
| H | 2.11914600  | -1.19142100 | 2.08539600  |
| C | 4.84666300  | -1.32386300 | 0.05404400  |
| H | 4.77076400  | -1.54655900 | -2.10232800 |
| H | 4.59783100  | -1.10325700 | 2.17348700  |
| I | -1.73260600 | -3.89751900 | -0.37226400 |
| O | 6.20109700  | -1.25518800 | 0.22277200  |

|   |             |             |             |
|---|-------------|-------------|-------------|
| C | 7.02598400  | -1.38084100 | -0.92374000 |
| H | 8.05442100  | -1.31869900 | -0.56423600 |
| H | 6.87756000  | -2.34527900 | -1.42653100 |
| H | 6.84768200  | -0.57175600 | -1.64443600 |
| O | 0.04624000  | 2.13655200  | 5.82062700  |
| O | 2.82747500  | 4.38853200  | -3.31967500 |
| O | -6.13185900 | 1.45219800  | -1.55729900 |
| C | -6.88810400 | 2.49343600  | -0.95620400 |
| H | -7.87577400 | 2.45100800  | -1.41711300 |
| H | -6.98782900 | 2.34622400  | 0.12641700  |
| H | -6.44311800 | 3.47844500  | -1.14672300 |
| C | 2.22944200  | 5.12459400  | -4.37783600 |
| H | 3.02082400  | 5.75008400  | -4.79279900 |
| H | 1.84338300  | 4.46175800  | -5.16218900 |
| H | 1.41584300  | 5.76504300  | -4.01460400 |
| C | 0.48210800  | 3.43554900  | 6.19661500  |
| H | 0.44386500  | 3.46065100  | 7.28632200  |
| H | 1.51070600  | 3.62710500  | 5.86632200  |
| H | -0.17720600 | 4.21479700  | 5.79395500  |

(I) vinylSnBu<sub>3</sub>

Total energy: -554.945721001 Hartree

Free energy: -554.595839 Hartree

|    |             |             |             |
|----|-------------|-------------|-------------|
| C  | 4.06393500  | 0.26585000  | -1.23351700 |
| C  | 2.84459900  | 0.36369100  | -1.77524600 |
| Sn | 0.99766600  | 0.14197100  | -0.66733100 |
| H  | 4.97504400  | 0.38454000  | -1.82087000 |
| H  | 4.21955200  | 0.06236000  | -0.17497600 |
| H  | 2.78579400  | 0.57055000  | -2.84589300 |
| C  | 1.52033300  | -0.31947200 | 1.41541000  |
| H  | 2.40943900  | -0.96225100 | 1.39501600  |
| H  | 1.83163200  | 0.61475700  | 1.89901500  |
| C  | -0.15871900 | -1.49509000 | -1.56918300 |
| H  | 0.30786300  | -2.43766100 | -1.25676100 |
| H  | -0.01415100 | -1.43344600 | -2.65528900 |
| C  | -0.12337300 | 2.02926800  | -0.78872200 |

|   |             |             |             |
|---|-------------|-------------|-------------|
| H | 0.61226700  | 2.84183700  | -0.74442100 |
| H | -0.57902800 | 2.08654000  | -1.78535400 |
| C | -1.19571000 | 2.23230300  | 0.29406700  |
| H | -1.93412000 | 1.41937300  | 0.25250000  |
| H | -0.73734500 | 2.16913100  | 1.29109800  |
| C | -1.66054200 | -1.51350100 | -1.24181900 |
| H | -2.12270400 | -0.56416500 | -1.54730600 |
| H | -1.80976300 | -1.58245700 | -0.15511800 |
| C | 0.41027700  | -0.99437700 | 2.23820900  |
| H | 0.09529700  | -1.92661500 | 1.74864600  |
| H | -0.48267200 | -0.35420300 | 2.26486000  |
| C | -2.41625300 | -2.66901400 | -1.91712000 |
| H | -2.27383900 | -2.60271300 | -3.00443900 |
| H | -1.96289000 | -3.62141200 | -1.61017800 |
| C | -1.93376100 | 3.57514300  | 0.17523600  |
| H | -1.20040200 | 4.39180700  | 0.22070400  |
| H | -2.39924300 | 3.64130600  | -0.81764600 |
| C | 0.83084300  | -1.31328900 | 3.68153400  |
| H | 1.72044700  | -1.95757400 | 3.66105600  |
| H | 1.14161000  | -0.38378100 | 4.17782400  |
| C | -3.91417500 | -2.68481100 | -1.59455300 |
| H | -4.40002400 | -1.75808800 | -1.92133200 |
| H | -4.42294800 | -3.51839600 | -2.08996800 |
| H | -4.08671700 | -2.78415100 | -0.51661400 |
| C | -2.99932000 | 3.77955700  | 1.25733600  |
| H | -3.50589700 | 4.74387400  | 1.14501500  |
| H | -3.76435500 | 2.99569000  | 1.21379600  |
| H | -2.55683700 | 3.75192100  | 2.25987100  |
| C | -0.27462700 | -1.98851200 | 4.50012900  |
| H | -0.58168500 | -2.93737200 | 4.04516200  |
| H | 0.05596900  | -2.20241900 | 5.52192500  |
| H | -1.16465100 | -1.35198600 | 4.56568700  |

(J) Cation- $\pi$  complex between Ar-PdL-X and vinylSnBu<sub>3</sub>

Total energy: -4312.49790913Hartree

Free energy: -4311.703396 Hartree

|    |             |             |             |
|----|-------------|-------------|-------------|
| Pd | -0.15406200 | -0.01887000 | -0.91594600 |
| As | 2.06822600  | -0.35673700 | 0.11953700  |
| C  | 2.22176200  | -1.68915100 | 1.53391100  |
| C  | 3.40991100  | -2.41289200 | 1.71860700  |
| C  | 1.16083000  | -1.90402500 | 2.41547300  |
| C  | 3.52956400  | -3.32467900 | 2.75860000  |
| H  | 4.24582200  | -2.27523400 | 1.04029200  |
| C  | 1.27051200  | -2.81082900 | 3.47217000  |
| H  | 0.22235600  | -1.37940300 | 2.27307800  |
| C  | 2.45985800  | -3.52948200 | 3.64457500  |
| H  | 4.44014300  | -3.89655800 | 2.90460800  |
| H  | 0.42384100  | -2.96009900 | 4.13126600  |
| C  | 2.99358000  | 1.15463500  | 0.94670000  |
| C  | 3.45670000  | 2.23589100  | 0.17538000  |
| C  | 3.19013700  | 1.19495300  | 2.32994200  |
| C  | 4.10421500  | 3.30892300  | 0.77056100  |
| H  | 3.30757500  | 2.24552600  | -0.89868200 |
| C  | 3.82901400  | 2.27657400  | 2.94348900  |
| H  | 2.85081500  | 0.37374100  | 2.95188100  |
| C  | 4.29353900  | 3.33975500  | 2.16135100  |
| H  | 4.46412200  | 4.14427400  | 0.17912600  |
| H  | 3.96309600  | 2.27027900  | 4.01864700  |
| C  | 3.33380600  | -0.96777700 | -1.22896500 |
| C  | 2.88092800  | -1.81351700 | -2.24750400 |
| C  | 4.69353500  | -0.61771700 | -1.19831400 |
| C  | 3.75494600  | -2.30523300 | -3.21899000 |
| H  | 1.83533200  | -2.10632100 | -2.28302500 |
| C  | 5.57187400  | -1.09905600 | -2.16094400 |
| H  | 5.07090400  | 0.04135100  | -0.42340100 |
| C  | 5.10895300  | -1.94778800 | -3.17859200 |
| H  | 3.37035800  | -2.96124000 | -3.99075400 |
| H  | 6.62383800  | -0.83287600 | -2.14665300 |
| C  | 0.47753000  | 1.86159500  | -1.37816400 |
| C  | 0.23865900  | 2.97839500  | -0.55969500 |
| C  | 1.10464800  | 2.07555800  | -2.60958400 |



|    |             |             |             |
|----|-------------|-------------|-------------|
| C  | 0.60527000  | 4.25987700  | -0.96336600 |
| H  | -0.23495800 | 2.85542200  | 0.41067500  |
| C  | 1.48633300  | 3.36087600  | -3.02767600 |
| H  | 1.31764300  | 1.23761100  | -3.26930400 |
| C  | 1.23248500  | 4.46030500  | -2.20154200 |
| H  | 0.41972200  | 5.12265700  | -0.33063500 |
| H  | 1.97216300  | 3.48171800  | -3.98950900 |
| C  | -2.30646800 | 0.80724500  | -1.33252500 |
| C  | -1.86103800 | 0.16700300  | -2.46422300 |
| H  | -2.12457000 | 1.88148500  | -1.30456800 |
| H  | -1.38336500 | 0.72088400  | -3.27184300 |
| I  | -0.86102300 | -2.72527500 | -0.63450900 |
| O  | 1.55600900  | 5.75580600  | -2.50307600 |
| C  | 2.17675900  | 6.01459100  | -3.74990900 |
| H  | 2.33711100  | 7.09336700  | -3.79088700 |
| H  | 3.14539500  | 5.50420600  | -3.83724100 |
| H  | 1.53998100  | 5.71330600  | -4.59235100 |
| Sn | -3.80984500 | 0.11022200  | 0.11020200  |
| C  | -5.15390600 | 1.85144100  | 0.20524000  |
| H  | -4.55715800 | 2.72412200  | 0.50099600  |
| H  | -5.51077600 | 2.05918100  | -0.81136600 |
| C  | -4.90453200 | -1.61625100 | -0.66568700 |
| H  | -5.57134200 | -1.96287600 | 0.13428600  |
| C  | -2.97944100 | -0.20134400 | 2.11155200  |
| H  | -3.82921500 | -0.36828200 | 2.78613400  |
| H  | -2.40722900 | -1.13454100 | 2.08579400  |
| C  | -6.34828200 | 1.68505600  | 1.15840000  |
| H  | -6.94565600 | 0.81017200  | 0.86351000  |
| H  | -5.99071800 | 1.47249500  | 2.17636100  |
| C  | -7.27000700 | 2.91410900  | 1.20874400  |
| H  | -6.68029600 | 3.79122800  | 1.50840300  |
| H  | -7.63673800 | 3.12777400  | 0.19554500  |
| C  | -8.45852400 | 2.74336600  | 2.16078300  |
| H  | -8.12105900 | 2.56144500  | 3.18780000  |
| H  | -9.09443300 | 3.63484500  | 2.17374700  |
| H  | -9.08453200 | 1.89345300  | 1.86514000  |

|   |             |             |             |
|---|-------------|-------------|-------------|
| H | -2.11099600 | -0.86785300 | -2.67718900 |
| C | -2.11159400 | 0.95522600  | 2.63110900  |
| H | -1.23923200 | 1.08260900  | 1.97374200  |
| H | -2.66839200 | 1.90229100  | 2.58139500  |
| C | -1.62011600 | 0.75602800  | 4.07396500  |
| H | -1.06441600 | -0.18945200 | 4.13789600  |
| H | -2.48967700 | 0.64172800  | 4.73552700  |
| C | -0.73677400 | 1.90317600  | 4.57642400  |
| H | -0.41447600 | 1.73835100  | 5.61019900  |
| H | 0.16373300  | 2.00949600  | 3.96015100  |
| H | -1.27298400 | 2.85882700  | 4.54499800  |
| H | -4.17341500 | -2.41377300 | -0.83139800 |
| C | -5.71062300 | -1.34108200 | -1.94463700 |
| H | -6.42706000 | -0.52452300 | -1.77499000 |
| H | -5.04065400 | -0.99051900 | -2.74253000 |
| C | -6.47680900 | -2.57296900 | -2.45236600 |
| H | -7.15224100 | -2.92599000 | -1.66107700 |
| H | -5.76353400 | -3.38894600 | -2.62896700 |
| C | -7.27846700 | -2.30310400 | -3.73011700 |
| H | -6.62353900 | -1.98120900 | -4.54811900 |
| H | -7.81213400 | -3.19855300 | -4.06578900 |
| H | -8.02187200 | -1.51268700 | -3.57334800 |
| O | 6.04714700  | -2.36507300 | -4.07184900 |
| O | 4.93532400  | 4.43812600  | 2.64684500  |
| O | 2.67660000  | -4.44310400 | 4.63039000  |
| C | 5.14460300  | 4.53217100  | 4.04801000  |
| H | 5.66099300  | 5.47903900  | 4.21204200  |
| H | 4.19560500  | 4.53818400  | 4.59898700  |
| H | 5.77036700  | 3.71079200  | 4.41980400  |
| C | 5.64230200  | -3.23590700 | -5.11894000 |
| H | 4.89255700  | -2.76616700 | -5.76796400 |
| H | 6.54140500  | -3.44368900 | -5.70071800 |
| H | 5.23904100  | -4.17806600 | -4.72737100 |
| C | 1.61451000  | -4.73066700 | 5.52835800  |
| H | 1.99580600  | -5.49189300 | 6.21052800  |
| H | 1.32087200  | -3.84433900 | 6.10526700  |

H                    0.73619200   -5.12369400   5.00141700

(K)            Transition state for the transmetalation

imaginary mode 40.9 i cm<sup>-1</sup>

Total energy: -4312.46567440 Hartree

Free energy: -4311.671108 Hartree

|    |             |             |             |
|----|-------------|-------------|-------------|
| Pd | 0.09455300  | 0.77728800  | -1.30732200 |
| C  | 0.91212500  | -1.63838300 | 1.50371800  |
| C  | 0.72036500  | -3.02048900 | 1.47193800  |
| C  | 0.38112100  | -0.91815300 | 2.58912200  |
| C  | 0.01899300  | -3.68157000 | 2.48613200  |
| H  | 1.11224000  | -3.60277100 | 0.64466900  |
| C  | -0.30950400 | -1.56021100 | 3.60846200  |
| H  | 0.51644700  | 0.15907100  | 2.64427900  |
| C  | -0.50302900 | -2.95026500 | 3.55845600  |
| H  | -0.11548200 | -4.75488400 | 2.42260200  |
| H  | -0.71383300 | -1.00927500 | 4.45160500  |
| C  | 3.30027500  | 0.14022800  | 0.96662900  |
| C  | 4.06628100  | 1.11234100  | 0.29982500  |
| C  | 3.70793800  | -0.26717400 | 2.23913000  |
| C  | 5.20184500  | 1.65090400  | 0.88763400  |
| H  | 3.76413200  | 1.46554000  | -0.68044200 |
| C  | 4.84707400  | 0.27183900  | 2.84624000  |
| H  | 3.13693200  | -1.01284500 | 2.78262300  |
| C  | 5.60141200  | 1.23463100  | 2.16706900  |
| H  | 5.79129300  | 2.40720500  | 0.38001200  |
| H  | 5.13031900  | -0.06665000 | 3.83605200  |
| C  | 2.66448800  | -2.03844400 | -0.98709600 |
| C  | 2.36579000  | -2.20514100 | -2.34879800 |
| C  | 3.65196700  | -2.85002500 | -0.41939000 |
| C  | 3.02566600  | -3.15954400 | -3.11382600 |
| H  | 1.61057500  | -1.58084400 | -2.81499400 |
| C  | 4.31899900  | -3.81802400 | -1.17241200 |
| H  | 3.92356200  | -2.72652300 | 0.62483700  |
| C  | 4.00476600  | -3.97604400 | -2.52920800 |
| H  | 2.80063900  | -3.29037800 | -4.16724800 |

|    |             |             |             |
|----|-------------|-------------|-------------|
| H  | 5.07876700  | -4.42909700 | -0.69944800 |
| C  | 1.15962800  | 2.48147500  | -1.02280900 |
| C  | 1.21781000  | 3.13234600  | 0.22175000  |
| C  | 1.89593800  | 3.04111900  | -2.07508600 |
| C  | 1.98111900  | 4.28403100  | 0.40821300  |
| H  | 0.66895100  | 2.73881600  | 1.07238500  |
| C  | 2.68190100  | 4.19005400  | -1.90019400 |
| H  | 1.86212000  | 2.58785200  | -3.06139700 |
| C  | 2.72230100  | 4.81976200  | -0.65234000 |
| H  | 2.02359500  | 4.77982200  | 1.37369200  |
| H  | 3.23840700  | 4.58242200  | -2.74436400 |
| C  | -1.50292200 | 1.69357700  | -3.69408900 |
| C  | -1.07171200 | 1.99529500  | -2.45999700 |
| Sn | -2.98792600 | 0.49106100  | -0.14955000 |
| C  | -4.58956400 | 0.89798500  | -1.58392200 |
| H  | -4.10240600 | 1.27593000  | -2.48654000 |
| H  | -5.17626300 | 1.72510800  | -1.16267100 |
| C  | -2.34216200 | 2.29156900  | 0.93551200  |
| H  | -1.66799300 | 2.85902100  | 0.29311000  |
| H  | -1.76015600 | 1.94892200  | 1.79846300  |
| C  | -3.52366300 | -1.06489400 | 1.30731800  |
| H  | -4.09484100 | -1.82141500 | 0.75736500  |
| H  | -2.59184500 | -1.54317900 | 1.62380100  |
| H  | -1.25997600 | 3.00946500  | -2.10217700 |
| H  | -2.02360400 | 2.42919000  | -4.31118300 |
| H  | -1.35775900 | 0.71554600  | -4.14669100 |
| O  | -1.21381100 | -3.48479500 | 4.59312000  |
| O  | 4.59368500  | -4.88220100 | -3.35866500 |
| O  | 6.72752600  | 1.82635800  | 2.65794600  |
| C  | 7.17029400  | 1.45792400  | 3.95413500  |
| H  | 8.06730800  | 2.04880700  | 4.14579400  |
| H  | 6.41773000  | 1.68644800  | 4.71981300  |
| H  | 7.42337500  | 0.39107200  | 4.00870300  |
| C  | 5.60028300  | -5.72980500 | -2.82732700 |
| H  | 5.92741600  | -6.36279600 | -3.65351600 |
| H  | 6.45692600  | -5.15556000 | -2.45191200 |

|    |             |             |             |
|----|-------------|-------------|-------------|
| H  | 5.21174400  | -6.36359800 | -2.01980400 |
| C  | -1.44681700 | -4.88617300 | 4.59550200  |
| H  | -0.50674400 | -5.45110800 | 4.63241100  |
| H  | -2.02565700 | -5.09297700 | 5.49669900  |
| H  | -2.02165200 | -5.20151100 | 3.71588600  |
| C  | -4.31014300 | -0.56167500 | 2.52732100  |
| H  | -3.73220100 | 0.20883400  | 3.05670100  |
| H  | -5.24397900 | -0.07489100 | 2.20973300  |
| C  | -4.65622000 | -1.68383800 | 3.52164500  |
| H  | -3.72759600 | -2.16289900 | 3.85809900  |
| H  | -5.23011400 | -2.45985400 | 2.99719200  |
| C  | -5.45035200 | -1.18881600 | 4.73515900  |
| H  | -5.68122700 | -2.00842300 | 5.42373000  |
| H  | -4.88768400 | -0.43380800 | 5.29639100  |
| H  | -6.40008400 | -0.73355400 | 4.43102600  |
| C  | -5.49164400 | -0.30137100 | -1.90017500 |
| H  | -4.88477400 | -1.12717900 | -2.29410400 |
| H  | -5.96261900 | -0.67890200 | -0.98142300 |
| C  | -6.59378100 | 0.03400500  | -2.91842600 |
| H  | -6.12626900 | 0.40384900  | -3.84056400 |
| H  | -7.20338800 | 0.86246200  | -2.53227900 |
| C  | -7.49625300 | -1.16122200 | -3.24229100 |
| H  | -8.26891900 | -0.89360700 | -3.97063700 |
| H  | -6.91714200 | -1.99178400 | -3.66166400 |
| H  | -8.00168400 | -1.53236000 | -2.34307600 |
| C  | -3.53448100 | 3.15145500  | 1.38746800  |
| H  | -4.23086400 | 2.56186800  | 2.00063100  |
| H  | -4.10804600 | 3.48780800  | 0.51276500  |
| C  | -3.09701700 | 4.38722000  | 2.19337200  |
| H  | -2.53036400 | 4.05706300  | 3.07436000  |
| H  | -2.40013400 | 4.97949700  | 1.58641900  |
| C  | -4.27312500 | 5.26414000  | 2.63574700  |
| H  | -4.97030800 | 4.70436300  | 3.26995400  |
| H  | -3.92948300 | 6.13302700  | 3.20649400  |
| H  | -4.83715800 | 5.63593600  | 1.77270900  |
| As | 1.76027100  | -0.64633200 | 0.04616800  |

|   |             |             |             |
|---|-------------|-------------|-------------|
| I | -1.49985100 | -1.56783000 | -1.80739600 |
| O | 3.44497500  | 5.95068600  | -0.36788100 |
| C | 4.19851100  | 6.53552500  | -1.41324200 |
| H | 4.68660500  | 7.41235200  | -0.98326300 |
| H | 4.96665400  | 5.85025500  | -1.79718600 |
| H | 3.56053000  | 6.85344000  | -2.24903100 |

(L) Complex between vinyl-PdAr-L and Bu<sub>3</sub>SnI

Total energy: -4312.47181564 Hartree

Free energy: -4311.684294 Hartree

|    |             |             |             |
|----|-------------|-------------|-------------|
| Pd | -0.30656900 | 1.06415700  | 0.41278100  |
| As | -2.21222000 | -0.59899000 | -0.01366700 |
| C  | -1.69666300 | -2.31589300 | -0.80303400 |
| C  | -2.02726200 | -3.55002700 | -0.24180900 |
| C  | -0.92879500 | -2.30449300 | -1.98087000 |
| C  | -1.61189100 | -4.75084400 | -0.82785700 |
| H  | -2.61438200 | -3.59142500 | 0.66998000  |
| C  | -0.51993100 | -3.48658400 | -2.58223500 |
| H  | -0.64410200 | -1.35745900 | -2.43224000 |
| C  | -0.85663900 | -4.72188500 | -2.00519200 |
| H  | -1.88292600 | -5.68997400 | -0.35991400 |
| H  | 0.06805400  | -3.48326800 | -3.49449200 |
| C  | -3.76358400 | -0.14158700 | -1.11964300 |
| C  | -4.41739400 | 1.08811900  | -0.92031800 |
| C  | -4.25954200 | -1.00497300 | -2.09973800 |
| C  | -5.52824900 | 1.43384500  | -1.67696300 |
| H  | -4.05215000 | 1.78680000  | -0.17580400 |
| C  | -5.37512500 | -0.66586700 | -2.87270000 |
| H  | -3.77754400 | -1.96038900 | -2.27783000 |
| C  | -6.01539400 | 0.55968100  | -2.66083800 |
| H  | -6.03010700 | 2.38474900  | -1.53134700 |
| H  | -5.72850600 | -1.36083500 | -3.62551400 |
| C  | -3.08835000 | -1.14162000 | 1.64713700  |
| C  | -2.39044900 | -1.01529200 | 2.86035300  |
| C  | -4.39249900 | -1.64341800 | 1.68082700  |
| C  | -2.97394600 | -1.38999300 | 4.06399600  |

|    |             |             |             |
|----|-------------|-------------|-------------|
| H  | -1.38329400 | -0.60781600 | 2.86161200  |
| C  | -4.99419000 | -2.02323400 | 2.88356100  |
| H  | -4.96147500 | -1.73395300 | 0.76043800  |
| C  | -4.28173100 | -1.89857600 | 4.08311000  |
| H  | -2.44097100 | -1.29156800 | 5.00415300  |
| H  | -6.00870200 | -2.40419100 | 2.87267700  |
| C  | -1.46530400 | 2.68174000  | 0.07659500  |
| C  | -1.58440800 | 3.23816300  | -1.20924100 |
| C  | -2.19890800 | 3.27797900  | 1.10899600  |
| C  | -2.42375600 | 4.32319500  | -1.45712200 |
| H  | -1.02259800 | 2.81790700  | -2.03940900 |
| C  | -3.05130700 | 4.36829400  | 0.87510800  |
| H  | -2.11515200 | 2.89949100  | 2.12385000  |
| C  | -3.16636100 | 4.89415600  | -0.41560500 |
| H  | -2.51946100 | 4.74406700  | -2.45388400 |
| H  | -3.60246700 | 4.79570600  | 1.70572300  |
| C  | 1.72360400  | 2.69401400  | 1.95391800  |
| C  | 1.07959300  | 2.49851700  | 0.79284200  |
| Sn | 4.01411600  | -0.08401200 | 0.06382500  |
| C  | 4.99727700  | -1.93316800 | -0.57775800 |
| H  | 5.21164600  | -2.52222200 | 0.32125400  |
| H  | 4.25729500  | -2.50058900 | -1.15338700 |
| C  | 4.97295300  | 0.84823500  | 1.79065700  |
| H  | 4.34423000  | 1.69962300  | 2.06628900  |
| H  | 4.90786900  | 0.12440400  | 2.61092200  |
| C  | 3.45567000  | 1.19809800  | -1.61557000 |
| H  | 3.67932300  | 0.63622300  | -2.53044300 |
| H  | 2.36869600  | 1.31121800  | -1.55718700 |
| H  | 1.28835500  | 3.20765500  | -0.01328300 |
| H  | 2.43428700  | 3.51362100  | 2.08871900  |
| H  | 1.55953300  | 2.06880200  | 2.83004400  |
| C  | 4.14056400  | 2.57329600  | -1.63349600 |
| H  | 3.91880600  | 3.10701700  | -0.70062400 |
| H  | 5.23355000  | 2.45903200  | -1.67314300 |
| C  | 6.27574400  | -1.72191500 | -1.40622700 |
| H  | 6.05560000  | -1.10895300 | -2.29179200 |

|   |             |             |             |
|---|-------------|-------------|-------------|
| H | 7.01770000  | -1.15663300 | -0.82462600 |
| C | 6.43082800  | 1.28036000  | 1.56202700  |
| H | 6.48886600  | 1.99746300  | 0.73153800  |
| H | 7.04323200  | 0.41779200  | 1.26329800  |
| C | 7.05938000  | 1.92125200  | 2.81057000  |
| H | 6.45306400  | 2.78583000  | 3.11093500  |
| H | 7.00599700  | 1.20764600  | 3.64358300  |
| C | 3.69237400  | 3.44059400  | -2.82095800 |
| H | 2.60287500  | 3.56792300  | -2.77547100 |
| H | 3.89999200  | 2.90503100  | -3.75740000 |
| C | 6.91449200  | -3.04209200 | -1.86786700 |
| H | 6.17829700  | -3.60846800 | -2.45367400 |
| H | 7.14005800  | -3.65719100 | -0.98650400 |
| C | 8.18775300  | -2.83949900 | -2.69566200 |
| H | 8.61672700  | -3.79687800 | -3.00875200 |
| H | 7.98442600  | -2.25517100 | -3.60039200 |
| H | 8.95349000  | -2.30435100 | -2.12237200 |
| C | 8.51232800  | 2.35794600  | 2.59689500  |
| H | 8.59043400  | 3.09698800  | 1.79128900  |
| H | 8.93010000  | 2.80943900  | 3.50253400  |
| H | 9.14776000  | 1.50654000  | 2.32692000  |
| C | 4.37024400  | 4.81432900  | -2.85116700 |
| H | 4.02904500  | 5.40832300  | -3.70516400 |
| H | 4.14976400  | 5.38414000  | -1.94149500 |
| H | 5.45980700  | 4.71895800  | -2.92670800 |
| O | -0.40341100 | -5.82581300 | -2.66548500 |
| O | -7.10861200 | 0.99417800  | -3.35168300 |
| O | -4.76811800 | -2.23470500 | 5.31130400  |
| C | -0.69173700 | -7.10207600 | -2.11661200 |
| H | -0.23339500 | -7.82966000 | -2.78824100 |
| H | -0.26333200 | -7.21717500 | -1.11274300 |
| H | -1.77250700 | -7.28803300 | -2.06788600 |
| C | -7.63273600 | 0.16084800  | -4.37243700 |
| H | -8.48372000 | 0.69841500  | -4.79378400 |
| H | -6.89514000 | -0.02372200 | -5.16414300 |
| H | -7.97709200 | -0.80246900 | -3.97388400 |



|   |             |             |             |
|---|-------------|-------------|-------------|
| C | -6.09214000 | -2.73766100 | 5.39736800  |
| H | -6.27207600 | -2.93227000 | 6.45574800  |
| H | -6.82724900 | -2.00781400 | 5.03474000  |
| H | -6.20827400 | -3.67277900 | 4.83436200  |
| I | 1.54315800  | -1.15305100 | 1.06490200  |
| O | -3.96609000 | 5.95601100  | -0.76103600 |
| C | -4.71218700 | 6.58268100  | 0.26431200  |
| H | -5.42614700 | 5.89135400  | 0.73323100  |
| H | -4.06325700 | 7.00107700  | 1.04581000  |
| H | -5.26467400 | 7.39459700  | -0.21298700 |

(M) vinyl-PdAr-L

Total energy: -3824.03586941 Hartree

Free energy: -3823.579884 Hartree

|    |             |             |             |
|----|-------------|-------------|-------------|
| Pd | 0.86877300  | -2.07567900 | -1.02311800 |
| As | -0.62300300 | -0.21610900 | -0.15695600 |
| C  | -2.49241200 | -0.44644600 | -0.67787300 |
| C  | -3.56287700 | -0.24556300 | 0.19647900  |
| C  | -2.77295300 | -0.86042600 | -1.99269600 |
| C  | -4.88426700 | -0.44501600 | -0.21545400 |
| H  | -3.37564100 | 0.06482200  | 1.21979200  |
| C  | -4.07911400 | -1.05774400 | -2.41806300 |
| H  | -1.95838700 | -1.03218800 | -2.69239700 |
| C  | -5.14668200 | -0.85163500 | -1.52918900 |
| H  | -5.68992700 | -0.28357400 | 0.49108100  |
| H  | -4.30131100 | -1.37845600 | -3.43062100 |
| C  | -0.25866000 | 1.61707300  | -0.71437700 |
| C  | 1.07811600  | 2.03478900  | -0.84292700 |
| C  | -1.27574400 | 2.53244900  | -0.99621400 |
| C  | 1.38067700  | 3.33247100  | -1.23198800 |
| H  | 1.88680100  | 1.33719500  | -0.64777600 |
| C  | -0.98399400 | 3.84087500  | -1.39308400 |
| H  | -2.31567800 | 2.23050000  | -0.91743800 |
| C  | 0.35123300  | 4.24564900  | -1.51004000 |
| H  | 2.40914300  | 3.66264500  | -1.33553100 |
| H  | -1.79715800 | 4.52394700  | -1.60882700 |

|   |             |             |             |
|---|-------------|-------------|-------------|
| C | -0.74274600 | -0.06007800 | 1.78397300  |
| C | -0.62107800 | -1.22607500 | 2.55959400  |
| C | -0.92904500 | 1.15868300  | 2.44028800  |
| C | -0.69644000 | -1.17479100 | 3.94460400  |
| H | -0.45386400 | -2.18331400 | 2.07190800  |
| C | -1.00207700 | 1.22771300  | 3.83473300  |
| H | -1.00990900 | 2.07675100  | 1.86634000  |
| C | -0.88779000 | 0.05603300  | 4.59300200  |
| H | -0.60004800 | -2.07048200 | 4.54960000  |
| H | -1.14141300 | 2.19075000  | 4.31164300  |
| C | 2.69084300  | -1.38198300 | -0.56357200 |
| C | 3.58896500  | -0.97526800 | -1.55384800 |
| C | 3.05850200  | -1.20928600 | 0.78208100  |
| C | 4.81013900  | -0.36766500 | -1.22461300 |
| H | 3.34968500  | -1.11918900 | -2.60332900 |
| C | 4.27399100  | -0.61704800 | 1.11899300  |
| H | 2.39464900  | -1.52785100 | 1.57978500  |
| C | 5.15643100  | -0.18838600 | 0.11773100  |
| H | 5.47473100  | -0.05437600 | -2.02212500 |
| H | 4.56062200  | -0.47996600 | 2.15744800  |
| C | 1.41185300  | -4.90592100 | -1.44594900 |
| C | 1.80202500  | -3.66693200 | -1.78048000 |
| H | 2.55656600  | -3.54127200 | -2.56057900 |
| H | 1.77665800  | -5.79058200 | -1.97252900 |
| H | 0.70887300  | -5.10186400 | -0.63717900 |
| O | -6.38983200 | -1.07630800 | -2.03801300 |
| O | 0.75255900  | 5.49164100  | -1.88848300 |
| O | -0.94222100 | 0.00436900  | 5.95278600  |
| C | -7.51029400 | -0.90333200 | -1.18354900 |
| H | -8.38783800 | -1.13970900 | -1.78696800 |
| H | -7.47073900 | -1.58224600 | -0.32230200 |
| H | -7.58858400 | 0.13024900  | -0.82267900 |
| C | -0.24198600 | 6.45568000  | -2.19751400 |
| H | 0.29503700  | 7.36380500  | -2.47534300 |
| H | -0.86881500 | 6.13533200  | -3.03952000 |
| H | -0.88414600 | 6.66711500  | -1.33277500 |

|   |             |             |             |
|---|-------------|-------------|-------------|
| C | -1.10768800 | 1.21920400  | 6.66854100  |
| H | -1.11435400 | 0.94712300  | 7.72495800  |
| H | -0.28066800 | 1.91538100  | 6.48007700  |
| H | -2.05590000 | 1.71148100  | 6.41705100  |
| O | 6.32208300  | 0.38601300  | 0.55541200  |
| C | 7.25717600  | 0.81275400  | -0.41766600 |
| H | 6.84071100  | 1.59124700  | -1.07150100 |
| H | 8.10341900  | 1.22637900  | 0.13420700  |
| H | 7.60770200  | -0.02119600 | -1.04061300 |

(N) Bu<sub>3</sub>SnI

Total energy: -488.427131111 Hartree

Free energy: -488.118854 Hartree

|    |             |             |             |
|----|-------------|-------------|-------------|
| Sn | 0.35401000  | 0.00096000  | 0.00022000  |
| C  | -0.19604700 | -0.73102600 | 1.98775000  |
| H  | 0.06994100  | -1.79335400 | 2.02354000  |
| H  | 0.45942500  | -0.22148400 | 2.70221500  |
| C  | -0.19131600 | -1.35420200 | -1.62930400 |
| H  | 0.07241000  | -0.85165800 | -2.56658300 |
| H  | 0.46815900  | -2.22482400 | -1.54644900 |
| C  | -0.18880200 | 2.09025300  | -0.35984500 |
| H  | 0.07763900  | 2.65112400  | 0.54294800  |
| H  | 0.46955300  | 2.45203700  | -1.15698900 |
| C  | -1.66365300 | 2.32089200  | -0.72968800 |
| H  | -1.92112800 | 1.74577000  | -1.63003800 |
| H  | -2.32064100 | 1.94525300  | 0.06728200  |
| C  | -1.67250100 | -0.52542400 | 2.36583000  |
| H  | -1.92847300 | 0.54226900  | 2.31879000  |
| H  | -2.32651600 | -1.02550200 | 1.63777600  |
| C  | -1.66572000 | -1.79145600 | -1.64110100 |
| H  | -2.32390800 | -0.91416800 | -1.71199900 |
| H  | -1.92040800 | -2.28475800 | -0.69268400 |
| C  | -1.99303400 | -2.74867000 | -2.79886100 |
| H  | -1.74343700 | -2.25852700 | -3.74934000 |
| H  | -1.33992700 | -3.62872400 | -2.72983200 |
| C  | -1.98911000 | 3.80241500  | -0.98048200 |

|   |             |             |             |
|---|-------------|-------------|-------------|
| H | -1.33701200 | 4.18084000  | -1.77884300 |
| H | -1.73667500 | 4.38090500  | -0.08182900 |
| C | -2.00567100 | -1.05159000 | 3.77151500  |
| H | -1.35682200 | -0.55162700 | 4.50284700  |
| H | -1.75465200 | -2.11947800 | 3.82222800  |
| C | -3.47385200 | -0.84745500 | 4.15906900  |
| H | -3.67826200 | -1.23214900 | 5.16338800  |
| H | -3.74311500 | 0.21495300  | 4.14948600  |
| H | -4.14422900 | -1.36435400 | 3.46279900  |
| C | -3.45902500 | -3.19363600 | -2.81688000 |
| H | -4.13355700 | -2.33566400 | -2.91824000 |
| H | -3.65915400 | -3.87311100 | -3.65156200 |
| H | -3.72674500 | -3.71670600 | -1.89165700 |
| C | -3.45545400 | 4.04267900  | -1.35406100 |
| H | -3.65408200 | 5.10546400  | -1.52572900 |
| H | -3.72596800 | 3.50259500  | -2.26863900 |
| H | -4.12897700 | 3.70338300  | -0.55868400 |
| I | 3.18889000  | -0.00289100 | 0.00398400  |

(O) Transition state for the reductive elimination

imaginary mode 263.0 i cm<sup>-1</sup>

Total energy: -3824.03010905 Hartree

Free energy: -3823.573200 Hartree

|    |             |             |             |
|----|-------------|-------------|-------------|
| Pd | 1.13308100  | -1.42426300 | -1.36773200 |
| As | -0.68873000 | -0.18387900 | -0.20762900 |
| C  | -2.43890100 | -0.23013900 | -1.07750200 |
| C  | -3.64156400 | -0.33191200 | -0.37484300 |
| C  | -2.48870900 | -0.17382100 | -2.48154400 |
| C  | -4.87081900 | -0.37165600 | -1.04077500 |
| H  | -3.63273400 | -0.39095000 | 0.70923400  |
| C  | -3.70064200 | -0.20673500 | -3.15683700 |
| H  | -1.56537900 | -0.11067400 | -3.05219700 |
| C  | -4.90324500 | -0.30643200 | -2.43872300 |
| H  | -5.78420800 | -0.45617900 | -0.46371500 |
| H  | -3.74527000 | -0.16605700 | -4.24033100 |
| C  | -0.39636200 | 1.73137600  | 0.02885200  |

|   |             |             |             |
|---|-------------|-------------|-------------|
| C | 0.91840500  | 2.19060500  | 0.21964000  |
| C | -1.43441300 | 2.66595600  | 0.01062400  |
| C | 1.17999700  | 3.54186700  | 0.40077900  |
| H | 1.74391000  | 1.48434100  | 0.21056200  |
| C | -1.18485500 | 4.03043500  | 0.18673200  |
| H | -2.45690400 | 2.33893900  | -0.15300000 |
| C | 0.12875600  | 4.47222200  | 0.38617300  |
| H | 2.19216900  | 3.90498100  | 0.54664200  |
| H | -2.01267600 | 4.72936900  | 0.16151900  |
| C | -1.11210200 | -0.77753700 | 1.60368500  |
| C | -1.02647900 | -2.15007800 | 1.89396400  |
| C | -1.48405200 | 0.09608300  | 2.62785000  |
| C | -1.31748000 | -2.63251700 | 3.16231400  |
| H | -0.71709300 | -2.84580100 | 1.11803400  |
| C | -1.77401000 | -0.37339600 | 3.91281400  |
| H | -1.54242200 | 1.16317900  | 2.43635000  |
| C | -1.69383400 | -1.74467500 | 4.18300800  |
| H | -1.25138000 | -3.69069500 | 3.39370600  |
| H | -2.05310100 | 0.33336000  | 4.68545700  |
| C | 3.12809400  | -1.15852300 | -0.98709800 |
| C | 3.83220700  | -0.12513300 | -1.61712100 |
| C | 3.67703700  | -1.71139100 | 0.18661000  |
| C | 5.02110600  | 0.38579200  | -1.07752900 |
| H | 3.45818500  | 0.30108200  | -2.54360300 |
| C | 4.85503800  | -1.21267100 | 0.72983200  |
| H | 3.18037900  | -2.54096500 | 0.68050200  |
| C | 5.53555900  | -0.15705600 | 0.10302500  |
| H | 5.52902100  | 1.19438000  | -1.59119100 |
| H | 5.27488200  | -1.63182600 | 1.63935600  |
| C | 2.52104400  | -3.85690700 | -2.28974400 |
| C | 2.40645700  | -2.53107600 | -2.46719700 |
| H | 2.70591200  | -2.08889500 | -3.41913200 |
| H | 2.84223300  | -4.51294300 | -3.09911900 |
| H | 2.31430600  | -4.33870300 | -1.33735400 |
| O | 0.48912100  | 5.77432100  | 0.56692900  |
| O | -1.95242900 | -2.31288500 | 5.39422800  |

|   |             |             |             |
|---|-------------|-------------|-------------|
| O | -6.03909000 | -0.33772500 | -3.19076000 |
| C | -7.28607000 | -0.45835500 | -2.52376100 |
| H | -7.47157500 | 0.39163300  | -1.85448900 |
| H | -8.04603800 | -0.47056300 | -3.30640400 |
| H | -7.34774400 | -1.38950200 | -1.94620600 |
| C | -0.52741100 | 6.76414100  | 0.54623300  |
| H | -0.02212700 | 7.71814600  | 0.70410500  |
| H | -1.05005800 | 6.78813600  | -0.41858500 |
| H | -1.26145400 | 6.60838700  | 1.34737100  |
| C | -2.31456000 | -1.46482800 | 6.47312300  |
| H | -2.46521500 | -2.11929800 | 7.33290500  |
| H | -1.52131500 | -0.74243900 | 6.70394600  |
| H | -3.24551700 | -0.92123400 | 6.26651900  |
| O | 6.68743000  | 0.25685700  | 0.71855000  |
| C | 7.42258700  | 1.30572600  | 0.11555700  |
| H | 8.29148600  | 1.47460000  | 0.75438400  |
| H | 7.76474700  | 1.03682100  | -0.89288800 |
| H | 6.83636400  | 2.23272800  | 0.05461400  |

(P) p-methoxystyrene (2)

Total energy: -424.178044808 Hartree

Free energy: -424.046626 Hartree

|   |             |             |             |
|---|-------------|-------------|-------------|
| C | -1.44930600 | -0.23902600 | -0.00022700 |
| C | -0.50812900 | -1.27762700 | -0.00011300 |
| C | -0.95348900 | 1.08183000  | -0.00034900 |
| C | 0.86723200  | -1.03537400 | 0.00001500  |
| H | -0.85773000 | -2.30727000 | -0.00007900 |
| C | 0.40658100  | 1.34138400  | -0.00024300 |
| H | -1.64542000 | 1.91848400  | -0.00066000 |
| C | 1.33215000  | 0.28345500  | -0.00004600 |
| H | 1.55542800  | -1.87234000 | 0.00016300  |
| H | 0.78624400  | 2.35807600  | -0.00040200 |
| C | -3.91811200 | 0.28386400  | 0.00062300  |
| C | -2.88224100 | -0.56541500 | -0.00023800 |
| H | -3.09961900 | -1.63364700 | -0.00099100 |
| H | -4.93899800 | -0.08349500 | 0.00048300  |

|   |             |             |             |
|---|-------------|-------------|-------------|
| H | -3.79573600 | 1.36310200  | 0.00153600  |
| O | 2.64677300  | 0.64769400  | 0.00017100  |
| C | 3.62649800  | -0.37809400 | 0.00021600  |
| H | 4.59334100  | 0.12756500  | 0.00057700  |
| H | 3.55033800  | -1.01117100 | 0.89377700  |
| H | 3.55086900  | -1.01084200 | -0.89359200 |

(Q) PdL

Total energy: -3399.88481954 Hartree

Free energy: -3399.574284 Hartree

|    |             |             |             |
|----|-------------|-------------|-------------|
| Pd | 0.00041900  | -0.00192000 | 3.25277700  |
| As | 0.00014500  | -0.00094900 | 0.91661200  |
| C  | -0.08861400 | 1.75263400  | 0.05127300  |
| C  | 0.58566200  | 2.05286800  | -1.13437700 |
| C  | -0.85974800 | 2.76047100  | 0.65441000  |
| C  | 0.49639000  | 3.32011000  | -1.72014800 |
| H  | 1.20084500  | 1.29840400  | -1.61520900 |
| C  | -0.96408300 | 4.02064600  | 0.08258200  |
| H  | -1.37196400 | 2.55281700  | 1.59046800  |
| C  | -0.28426900 | 4.30960400  | -1.11160100 |
| H  | 1.03810900  | 3.52006900  | -2.63726500 |
| H  | -1.55649700 | 4.80400300  | 0.54438400  |
| C  | -1.47423600 | -0.95358600 | 0.05045900  |
| C  | -1.96627200 | -2.12226100 | 0.65562500  |
| C  | -2.06727700 | -0.52139300 | -1.13786600 |
| C  | -3.00629900 | -2.84119400 | 0.08339000  |
| H  | -1.53351700 | -2.46074600 | 1.59361500  |
| C  | -3.12081300 | -1.23080800 | -1.72413700 |
| H  | -1.71759700 | 0.38624300  | -1.62035000 |
| C  | -3.59237400 | -2.39849000 | -1.11335700 |
| H  | -3.39226100 | -3.74348500 | 0.54681700  |
| H  | -3.56162700 | -0.86290100 | -2.64331100 |
| C  | 1.56302500  | -0.80016300 | 0.05045700  |
| C  | 2.82214500  | -0.63243200 | 0.65108100  |
| C  | 1.48532800  | -1.53745100 | -1.13314500 |
| C  | 3.96571100  | -1.17143800 | 0.07868800  |

|   |             |             |             |
|---|-------------|-------------|-------------|
| H | 2.89904200  | -0.08263100 | 1.58569400  |
| C | 2.62750000  | -2.09308000 | -1.71943300 |
| H | 0.52389700  | -1.69623500 | -1.61199300 |
| C | 3.87545100  | -1.90775000 | -1.11355100 |
| H | 4.94087100  | -1.04702200 | 0.53851900  |
| H | 2.52935100  | -2.66469600 | -2.63495100 |
| O | -0.44294700 | 5.57650400  | -1.59030400 |
| O | 5.05211100  | -2.40251000 | -1.59317700 |
| O | -4.61148700 | -3.16753700 | -1.59221000 |
| C | 0.23582700  | 5.93471000  | -2.78361000 |
| H | -0.02383000 | 6.97668300  | -2.97686700 |
| H | 1.32432900  | 5.84885500  | -2.67201200 |
| H | -0.08629400 | 5.31958200  | -3.63385100 |
| C | -5.25719900 | -2.76010400 | -2.78807300 |
| H | -6.03132800 | -3.50434900 | -2.98120700 |
| H | -5.72464700 | -1.77293600 | -2.68010300 |
| H | -4.56138400 | -2.73559800 | -3.63677200 |
| C | 5.02247600  | -3.17141700 | -2.78521800 |
| H | 6.05500300  | -3.46541300 | -2.97997600 |
| H | 4.40621500  | -4.07245500 | -2.67108300 |
| H | 4.64781300  | -2.58708600 | -3.63565200 |

**(3) Optimized geometries in Figure S22, obtained from dispersion corrected B3LYP (B3LYP-GD3) calculations**

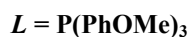

(A)  $\text{PdL}_2$

Total energy: -2887.87196958 Hartree

Free energy: -2887.222729 Hartree

|    |            |             |             |
|----|------------|-------------|-------------|
| Pd | 0.00000100 | -0.00004200 | 0.00000600  |
| P  | 2.29925100 | 0.00040400  | 0.00074700  |
| C  | 3.08392500 | 1.61459300  | 0.41710800  |
| C  | 4.29053900 | 1.73653500  | 1.11418200  |
| C  | 2.43565200 | 2.79151900  | -0.00401600 |
| C  | 4.85164500 | 2.98872500  | 1.38376000  |
| H  | 4.80581300 | 0.84668800  | 1.46288200  |
| C  | 2.98549900 | 4.03987800  | 0.24791800  |



|   |             |             |             |
|---|-------------|-------------|-------------|
| H | 1.48420300  | 2.71529500  | -0.52457000 |
| C | 4.19911200  | 4.14727900  | 0.94580200  |
| H | 5.78417200  | 3.04441100  | 1.93279500  |
| H | 2.49079200  | 4.95130700  | -0.07175600 |
| C | 3.08596800  | -0.44534900 | -1.60460600 |
| C | 2.44399000  | -1.40564200 | -2.40990500 |
| C | 4.28824100  | 0.10466400  | -2.06134000 |
| C | 2.99573700  | -1.81120700 | -3.61622800 |
| H | 1.49597800  | -1.82459600 | -2.08166900 |
| C | 4.85101700  | -0.28731200 | -3.28005700 |
| H | 4.79880100  | 0.85674200  | -1.46751500 |
| C | 4.20481000  | -1.25283200 | -4.06103500 |
| H | 2.50585900  | -2.54927300 | -4.24305200 |
| H | 5.78000700  | 0.16615200  | -3.60487400 |
| C | 3.08684500  | -1.16667200 | 1.18910400  |
| C | 2.43969000  | -1.39413100 | 2.41877200  |
| C | 4.29530100  | -1.82744800 | 0.94471500  |
| C | 2.99229600  | -2.23647600 | 3.37235200  |
| H | 1.48709000  | -0.90805200 | 2.61433000  |
| C | 4.85920600  | -2.68695400 | 1.89271800  |
| H | 4.80970800  | -1.68117800 | -0.00024700 |
| C | 4.20762300  | -2.89079600 | 3.11491600  |
| H | 2.49848000  | -2.41822900 | 4.32142800  |
| H | 5.79310000  | -3.18720900 | 1.66526900  |
| P | -2.29925000 | -0.00040500 | -0.00075500 |
| C | -3.08682700 | 1.16671100  | -1.18908300 |
| C | -4.29526000 | 1.82752200  | -0.94467900 |
| C | -2.43967400 | 1.39416100  | -2.41875600 |
| C | -4.85914600 | 2.68705300  | -1.89267100 |
| H | -4.80966600 | 1.68125900  | 0.00028500  |
| C | -2.99226200 | 2.23652900  | -3.37232500 |
| H | -1.48709100 | 0.90805300  | -2.61432600 |
| C | -4.20756700 | 2.89088500  | -3.11487300 |
| H | -5.79302200 | 3.18733600  | -1.66521000 |
| H | -2.49844800 | 2.41827400  | -4.32140300 |
| C | -3.08396700 | -1.61456600 | -0.41714300 |

|   |             |             |             |
|---|-------------|-------------|-------------|
| C | -4.29053100 | -1.73647300 | -1.11430700 |
| C | -2.43577300 | -2.79151000 | 0.00405400  |
| C | -4.85166500 | -2.98864700 | -1.38390500 |
| H | -4.80574600 | -0.84661200 | -1.46305900 |
| C | -2.98565000 | -4.03985200 | -0.24789800 |
| H | -1.48436100 | -2.71531600 | 0.52468000  |
| C | -4.19921300 | -4.14721800 | -0.94587500 |
| H | -5.78415300 | -3.04430500 | -1.93301000 |
| H | -2.49100400 | -4.95129400 | 0.07183300  |
| C | -3.08594200 | 0.44530500  | 1.60462200  |
| C | -4.28829000 | -0.10461600 | 2.06127300  |
| C | -2.44388000 | 1.40545300  | 2.41002400  |
| C | -4.85105800 | 0.28731200  | 3.28000800  |
| H | -4.79891200 | -0.85658900 | 1.46736800  |
| C | -2.99561700 | 1.81097000  | 3.61636900  |
| H | -1.49581300 | 1.82433100  | 2.08185000  |
| C | -4.20476400 | 1.25269100  | 4.06109100  |
| H | -5.78010700 | -0.16607700 | 3.60476000  |
| H | -2.50567500 | 2.54892500  | 4.24327300  |
| O | 4.65027000  | 5.41838300  | 1.15082400  |
| O | 4.65808900  | -1.71090200 | -5.26354800 |
| O | 4.66138800  | -3.70431800 | 4.11169800  |
| O | -4.66131500 | 3.70442800  | -4.11164500 |
| O | -4.65802600 | 1.71070100  | 5.26363300  |
| O | -4.65040500 | -5.41830900 | -1.15090700 |
| C | 5.87607300  | -4.40771600 | 3.90452300  |
| H | 6.04548900  | -4.99178100 | 4.81068400  |
| H | 5.81043500  | -5.08746600 | 3.04444300  |
| H | 6.72182500  | -3.72322400 | 3.75403300  |
| C | 5.86323100  | 5.59393200  | 1.86571500  |
| H | 6.03082300  | 6.67109000  | 1.91676800  |
| H | 5.79620600  | 5.19077800  | 2.88506900  |
| H | 6.71079000  | 5.12175100  | 1.35077500  |
| C | 5.86619200  | -1.17152400 | -5.77607900 |
| H | 6.03627100  | -1.66703100 | -6.73342600 |
| H | 5.79051500  | -0.08812600 | -5.93927200 |

|   |             |             |             |
|---|-------------|-------------|-------------|
| H | 6.71629400  | -1.37310700 | -5.11037100 |
| C | -5.87597600 | 4.40786300  | -3.90445300 |
| H | -5.81030900 | 5.08760500  | -3.04436800 |
| H | -6.04538200 | 4.99194000  | -4.81060800 |
| H | -6.72174800 | 3.72339700  | -3.75396100 |
| C | -5.86331400 | -5.59382500 | -1.86589200 |
| H | -5.79619200 | -5.19069300 | -2.88524900 |
| H | -6.03094300 | -6.67097700 | -1.91694000 |
| H | -6.71089800 | -5.12160200 | -1.35103100 |
| C | -5.86621500 | 1.17142700  | 5.77607000  |
| H | -5.79067700 | 0.08800600  | 5.93917500  |
| H | -6.03627200 | 1.66687400  | 6.73345200  |
| H | -6.71626600 | 1.37317000  | 5.11034500  |

(B) the first complex between Ar-X and PdL<sub>2</sub>

Total energy: -3245.50613153 Hartree

Free energy: -3244.737552 Hartree

|    |             |             |             |
|----|-------------|-------------|-------------|
| Pd | -0.03029700 | -0.92717600 | -0.35921900 |
| P  | 1.85323700  | 0.33007200  | 0.29916300  |
| C  | 1.90764700  | 0.73790400  | 2.09544200  |
| C  | 3.07570200  | 1.12948000  | 2.76299200  |
| C  | 0.71865000  | 0.65359200  | 2.84310500  |
| C  | 3.06591800  | 1.45247000  | 4.12203000  |
| H  | 4.01655000  | 1.17036700  | 2.22190800  |
| C  | 0.69056400  | 0.97529700  | 4.19323400  |
| H  | -0.19234600 | 0.31686400  | 2.36162500  |
| C  | 1.86558700  | 1.38175700  | 4.84272900  |
| H  | 3.99079900  | 1.74818100  | 4.60297800  |
| H  | -0.22829000 | 0.90654700  | 4.76662400  |
| C  | 1.92583500  | 1.96556300  | -0.54916300 |
| C  | 1.33818400  | 2.06149400  | -1.82465600 |
| C  | 2.47240400  | 3.12351600  | 0.01229400  |
| C  | 1.29430800  | 3.26819700  | -2.50654100 |
| H  | 0.88161000  | 1.17947200  | -2.26567200 |
| C  | 2.41919100  | 4.35028700  | -0.65408500 |
| H  | 2.92234800  | 3.08855800  | 0.99917700  |

|   |             |             |             |
|---|-------------|-------------|-------------|
| C | 1.81771000  | 4.42659200  | -1.91588300 |
| H | 0.81891900  | 3.35041300  | -3.47792400 |
| H | 2.82668700  | 5.23226200  | -0.17472800 |
| C | 3.52355400  | -0.38064200 | 0.00793000  |
| C | 3.95628900  | -1.45655800 | 0.80796500  |
| C | 4.31845200  | -0.00792200 | -1.07916200 |
| C | 5.13643400  | -2.12821600 | 0.52948800  |
| H | 3.35950000  | -1.76479900 | 1.66181800  |
| C | 5.50703200  | -0.68087400 | -1.37698000 |
| H | 4.01078500  | 0.81622700  | -1.71530300 |
| C | 5.91800200  | -1.75048800 | -0.57436700 |
| H | 5.47630100  | -2.95539400 | 1.14435100  |
| P | -2.01569200 | 0.32055000  | -0.25513500 |
| C | -3.32931100 | -0.19343700 | -1.43999600 |
| C | -4.69659900 | -0.19652300 | -1.14564600 |
| C | -2.92524300 | -0.62464500 | -2.71841800 |
| C | -5.64270100 | -0.61517500 | -2.08569500 |
| H | -5.04059500 | 0.12421700  | -0.16729500 |
| C | -3.85331900 | -1.02746200 | -3.66833100 |
| H | -1.86561500 | -0.64913800 | -2.96055700 |
| C | -5.22214700 | -1.02937200 | -3.35575000 |
| H | -6.69267200 | -0.61156400 | -1.81783800 |
| H | -3.54682100 | -1.35948000 | -4.65491800 |
| C | -2.82456000 | 0.19519000  | 1.39547900  |
| C | -2.55493600 | -0.93618700 | 2.17710000  |
| C | -3.68214700 | 1.17704600  | 1.92479500  |
| C | -3.12129200 | -1.10595100 | 3.44176700  |
| H | -1.87863800 | -1.69613700 | 1.80068900  |
| C | -4.25005800 | 1.02513600  | 3.18340800  |
| H | -3.89182000 | 2.07494600  | 1.35118100  |
| C | -3.97491900 | -0.11843900 | 3.95108300  |
| H | -2.87901200 | -1.99696100 | 4.00846800  |
| H | -4.90652100 | 1.78101400  | 3.60230600  |
| C | -1.90380700 | 2.14047900  | -0.51623100 |
| C | -2.37421800 | 2.77766000  | -1.66742200 |
| C | -1.18134200 | 2.90872700  | 0.41862200  |

|   |             |             |             |
|---|-------------|-------------|-------------|
| C | -2.11947700 | 4.13307200  | -1.90530000 |
| H | -2.93948500 | 2.21662000  | -2.40503000 |
| C | -0.94122500 | 4.25560500  | 0.20537200  |
| H | -0.78876700 | 2.44268900  | 1.31701000  |
| C | -1.39189400 | 4.87436900  | -0.97037000 |
| H | -2.48325700 | 4.58664700  | -2.81947200 |
| H | -0.36913700 | 4.84340600  | 0.91454100  |
| C | 0.63351300  | -3.03774500 | -0.72127600 |
| C | -0.76172800 | -3.03006200 | -1.02283900 |
| C | 1.07383900  | -3.65221900 | 0.49129700  |
| C | -1.68510800 | -3.61452500 | -0.10194800 |
| H | -1.10490800 | -2.83790900 | -2.03292700 |
| C | 0.15780400  | -4.14669700 | 1.39014600  |
| H | 2.13546300  | -3.69946700 | 0.70448800  |
| C | -1.23492400 | -4.12168100 | 1.09971400  |
| H | -2.73569100 | -3.60682800 | -0.36493300 |
| H | 0.47625800  | -4.56850800 | 2.33808700  |
| O | -1.06000300 | 6.19370300  | -1.10736000 |
| O | -4.57819200 | -0.16898100 | 5.17150600  |
| O | -6.05262200 | -1.45508300 | -4.34953400 |
| O | -2.03736000 | -4.61816800 | 2.09675200  |
| O | 1.73855900  | 1.67243100  | 6.16880300  |
| O | 1.67670700  | 5.57524400  | -2.64127500 |
| C | -7.44818900 | -1.48941700 | -4.09240000 |
| H | -7.84352600 | -0.49097900 | -3.86242300 |
| H | -7.91466000 | -1.85733200 | -5.00766700 |
| H | -7.69194600 | -2.16918300 | -3.26505000 |
| C | -4.31088100 | -1.28749300 | 6.00554000  |
| H | -3.24336400 | -1.36371700 | 6.25034500  |
| H | -4.87949100 | -1.12286600 | 6.92209200  |
| H | -4.63827500 | -2.22714100 | 5.54122000  |
| C | -1.34506900 | 6.82297300  | -2.34908900 |
| H | -2.42378500 | 6.85899800  | -2.54933000 |
| H | -0.96732900 | 7.84331900  | -2.26200800 |
| H | -0.82948700 | 6.31509800  | -3.17282400 |
| C | 2.89557300  | 2.08007300  | 6.88291600  |

|   |             |             |             |
|---|-------------|-------------|-------------|
| H | 2.56941300  | 2.26014700  | 7.90859300  |
| H | 3.66908500  | 1.30056500  | 6.88225200  |
| H | 3.32115300  | 3.00556400  | 6.47256200  |
| C | 2.04013600  | 6.80171000  | -2.02162800 |
| H | 1.81036700  | 7.58374600  | -2.74761200 |
| H | 1.45364100  | 6.96713200  | -1.11008300 |
| H | 3.11206600  | 6.83759100  | -1.78784700 |
| C | -3.43846900 | -4.60132200 | 1.87551800  |
| H | -3.72077800 | -5.21895200 | 1.01199900  |
| H | -3.89376700 | -5.01768900 | 2.77636900  |
| H | -3.80893100 | -3.57870600 | 1.72186700  |
| I | 2.07043500  | -3.05691900 | -2.40641900 |
| H | 6.09450500  | -0.36292900 | -2.23009300 |
| O | 7.05602400  | -2.47912200 | -0.76737100 |
| C | 7.85600500  | -2.18272800 | -1.90055700 |
| H | 7.29542400  | -2.30884800 | -2.83649500 |
| H | 8.25713700  | -1.16076800 | -1.86029600 |
| H | 8.68480200  | -2.89251900 | -1.87998700 |

(C) The transition state for the oxidative addition by PdL<sub>2</sub>

imaginary mode 106.75 i cm<sup>-1</sup>

Total energy: -3245.49522038 Hartree

Free energy: -3244.727255 Hartree

|    |            |             |             |
|----|------------|-------------|-------------|
| Pd | 0.14188100 | -0.90393600 | -0.58247800 |
| P  | 1.70394300 | 0.72576700  | 0.24838600  |
| C  | 1.83277800 | 0.87755700  | 2.07907200  |
| C  | 2.84929700 | 1.58378000  | 2.73839900  |
| C  | 0.84567900 | 0.26090200  | 2.86850800  |
| C  | 2.87425800 | 1.69917000  | 4.12991200  |
| H  | 3.65126900 | 2.03795000  | 2.16399700  |
| C  | 0.84972900 | 0.37270000  | 4.25248600  |
| H  | 0.06791700 | -0.32123000 | 2.38971400  |
| C  | 1.86398200 | 1.09788400  | 4.89431900  |
| H  | 3.67972900 | 2.24988000  | 4.60107400  |
| H  | 0.08121200 | -0.10198400 | 4.85387000  |
| C  | 1.22717000 | 2.41784400  | -0.32431300 |

|   |             |             |             |
|---|-------------|-------------|-------------|
| C | 0.48056200  | 2.52169800  | -1.51335300 |
| C | 1.51833300  | 3.59547200  | 0.37221000  |
| C | 0.04078600  | 3.75212100  | -1.97980700 |
| H | 0.22159500  | 1.62196600  | -2.06326200 |
| C | 1.06975100  | 4.83895200  | -0.07748600 |
| H | 2.07512100  | 3.55734100  | 1.30181800  |
| C | 0.31658300  | 4.91856100  | -1.25481900 |
| H | -0.55435600 | 3.82954100  | -2.88330900 |
| H | 1.29265000  | 5.72454200  | 0.50537300  |
| C | 3.45337200  | 0.57520000  | -0.29261900 |
| C | 4.40570900  | -0.13682400 | 0.46185700  |
| C | 3.80809500  | 0.97597100  | -1.58749200 |
| C | 5.66450400  | -0.41803000 | -0.05329500 |
| H | 4.15666300  | -0.48557600 | 1.45876000  |
| C | 5.06721100  | 0.69325500  | -2.12018500 |
| H | 3.09010400  | 1.50769100  | -2.20389800 |
| C | 6.00431200  | -0.00947600 | -1.35167900 |
| H | 6.40164200  | -0.96405200 | 0.52658100  |
| P | -2.06263000 | -0.28423200 | 0.06220200  |
| C | -3.41956700 | -0.95094700 | -0.98700000 |
| C | -4.73950300 | -1.06331200 | -0.53292300 |
| C | -3.13079700 | -1.34230700 | -2.30670400 |
| C | -5.75207900 | -1.55280900 | -1.35923200 |
| H | -4.98888400 | -0.77470700 | 0.48380400  |
| C | -4.13057800 | -1.82352100 | -3.14268500 |
| H | -2.11254300 | -1.27187600 | -2.67893900 |
| C | -5.44807300 | -1.93370100 | -2.67418600 |
| H | -6.76078300 | -1.63343500 | -0.97186100 |
| H | -3.91428000 | -2.12783100 | -4.16149200 |
| C | -2.48347400 | -0.88401300 | 1.75283700  |
| C | -1.88655200 | -2.07381200 | 2.19262500  |
| C | -3.33523600 | -0.20217300 | 2.63994000  |
| C | -2.12231100 | -2.57904400 | 3.47244900  |
| H | -1.20403200 | -2.60481200 | 1.53289900  |
| C | -3.57559400 | -0.69043800 | 3.91795000  |
| H | -3.79767400 | 0.73108900  | 2.33413400  |

|   |             |             |             |
|---|-------------|-------------|-------------|
| C | -2.96913500 | -1.88190400 | 4.34497800  |
| H | -1.63352600 | -3.49639400 | 3.77778500  |
| H | -4.22391600 | -0.16439600 | 4.61118700  |
| C | -2.43823000 | 1.51442400  | 0.13726500  |
| C | -3.20984700 | 2.15435700  | -0.83677000 |
| C | -1.80595200 | 2.31000100  | 1.11315900  |
| C | -3.34198800 | 3.54642100  | -0.86109900 |
| H | -3.71009000 | 1.56893900  | -1.60177200 |
| C | -1.94714100 | 3.68784700  | 1.11225800  |
| H | -1.18658500 | 1.84689600  | 1.87501800  |
| C | -2.70098300 | 4.31890100  | 0.11161500  |
| H | -3.93118600 | 4.00744300  | -1.64454100 |
| H | -1.44721600 | 4.30385800  | 1.85125600  |
| C | 1.35307100  | -2.42403500 | -1.32082500 |
| C | 0.39878800  | -3.42260800 | -1.04843700 |
| C | 2.71241400  | -2.63352400 | -1.01541700 |
| C | 0.77429800  | -4.54677000 | -0.28246700 |
| H | -0.59887800 | -3.37384900 | -1.47030400 |
| C | 3.06982500  | -3.74751300 | -0.27943500 |
| H | 3.45625700  | -1.90635500 | -1.31158500 |
| C | 2.10121200  | -4.69830200 | 0.11284200  |
| H | 0.02865200  | -5.30253400 | -0.06505500 |
| H | 4.10059700  | -3.90681500 | 0.02146800  |
| O | -2.73628100 | 5.68391400  | 0.17117700  |
| O | -3.26011000 | -2.26828400 | 5.61890600  |
| O | -6.35388400 | -2.42295600 | -3.56739200 |
| O | 2.58584200  | -5.75123600 | 0.84157200  |
| O | 1.78657700  | 1.14894000  | 6.25396100  |
| O | -0.20551300 | 6.07264100  | -1.76606600 |
| C | -7.70372300 | -2.56342900 | -3.15154500 |
| H | -8.14444000 | -1.59801200 | -2.86895600 |
| H | -8.24351800 | -2.96568200 | -4.01034900 |
| H | -7.79851300 | -3.25985600 | -2.30777100 |
| C | -2.64759200 | -3.44713500 | 6.12091200  |
| H | -1.55279100 | -3.36283600 | 6.12795700  |
| H | -3.00557200 | -3.55988200 | 7.14544900  |



|   |             |             |             |
|---|-------------|-------------|-------------|
| H | -2.93461100 | -4.33310500 | 5.53917900  |
| C | -3.35364000 | 6.37864300  | -0.90440400 |
| H | -4.42303400 | 6.14312300  | -0.98037600 |
| H | -3.24020200 | 7.44061000  | -0.67942700 |
| H | -2.85317100 | 6.15425700  | -1.85373000 |
| C | 2.78992000  | 1.86289800  | 6.96049300  |
| H | 2.53272900  | 1.77806000  | 8.01753600  |
| H | 3.78660800  | 1.43214900  | 6.79634100  |
| H | 2.80823000  | 2.92394800  | 6.67814900  |
| C | -0.07647100 | 7.25921400  | -0.99448600 |
| H | -0.58773500 | 8.04110700  | -1.55903900 |
| H | -0.55663500 | 7.14277800  | -0.01548600 |
| H | 0.97489200  | 7.54575000  | -0.86203600 |
| C | 1.66854800  | -6.74682000 | 1.25704500  |
| H | 1.20905300  | -7.26126600 | 0.40171200  |
| H | 2.24422900  | -7.46809100 | 1.84014900  |
| H | 0.87101200  | -6.32758100 | 1.88689800  |
| I | 0.89775100  | -1.22453100 | -3.46068300 |
| H | 5.29828500  | 1.01859100  | -3.12728600 |
| O | 7.26034400  | -0.34211600 | -1.76752600 |
| C | 7.63867400  | -0.00343700 | -3.09331300 |
| H | 6.98190900  | -0.47639500 | -3.83533900 |
| H | 7.63326400  | 1.08322000  | -3.25275100 |
| H | 8.65533800  | -0.37857400 | -3.22218300 |

(D) Ar-PdL<sub>2</sub>-I

Total energy: -3245.53985719 Hartree

Free energy: -3244.765224 Hartree

|    |             |             |             |
|----|-------------|-------------|-------------|
| Pd | -0.60303500 | 1.12738300  | -0.16560500 |
| C  | 2.41754200  | -0.25483700 | 1.17960900  |
| C  | 3.26937000  | -1.36299200 | 1.13125400  |
| C  | 1.91433000  | 0.14176700  | 2.43436300  |
| C  | 3.58118400  | -2.09278500 | 2.28273700  |
| H  | 3.66716600  | -1.70252600 | 0.18159800  |
| C  | 2.23040100  | -0.56209700 | 3.58681000  |
| H  | 1.24998600  | 0.99872200  | 2.49806000  |

|   |             |             |             |
|---|-------------|-------------|-------------|
| C | 3.04525300  | -1.70066800 | 3.51455200  |
| H | 4.22314000  | -2.96170800 | 2.19989400  |
| H | 1.82107400  | -0.27731900 | 4.54937500  |
| C | 2.95565700  | 2.12265400  | -0.35870500 |
| C | 2.73294100  | 3.09577100  | -1.35082800 |
| C | 4.05376300  | 2.27280800  | 0.48947700  |
| C | 3.59444600  | 4.16954900  | -1.49818300 |
| H | 1.86564400  | 3.01788400  | -1.99925800 |
| C | 4.92419200  | 3.36069500  | 0.36088700  |
| H | 4.24398200  | 1.54175700  | 1.26854700  |
| C | 4.69669300  | 4.31225600  | -0.63851100 |
| H | 3.42635900  | 4.92878400  | -2.25449400 |
| H | 5.76264200  | 3.45026200  | 1.04109400  |
| C | 2.34835400  | -0.24534400 | -1.77394000 |
| C | 1.39046000  | -0.68154700 | -2.70458200 |
| C | 3.69832500  | -0.50734700 | -2.04342800 |
| C | 1.76172500  | -1.40424700 | -3.82945400 |
| H | 0.34169900  | -0.46539300 | -2.53324300 |
| C | 4.08726400  | -1.24818500 | -3.16091600 |
| H | 4.46499300  | -0.11882800 | -1.37910500 |
| C | 3.11034800  | -1.71503100 | -4.05203900 |
| H | 1.02338400  | -1.76459300 | -4.53661300 |
| C | -1.16451600 | -1.46748200 | 1.87787500  |
| C | -0.84709400 | -2.73134500 | 2.38880300  |
| C | -1.30325000 | -0.39958200 | 2.78740900  |
| C | -0.60569700 | -2.92303500 | 3.75102100  |
| H | -0.75504900 | -3.58040700 | 1.71999100  |
| C | -1.10801300 | -0.58604300 | 4.14584800  |
| H | -1.51590300 | 0.59896100  | 2.41981700  |
| C | -0.71767800 | -1.84215800 | 4.63439000  |
| H | -0.32140500 | -3.90638000 | 4.10549400  |
| H | -1.18947400 | 0.24095300  | 4.84340800  |
| C | -3.14694500 | -1.39515200 | -0.26323900 |
| C | -3.65145500 | -0.97801200 | -1.50185300 |
| C | -4.05087000 | -1.86264900 | 0.70299000  |
| C | -5.01494100 | -0.99381600 | -1.77414200 |

|   |             |             |             |
|---|-------------|-------------|-------------|
| H | -2.98024200 | -0.56678800 | -2.24811300 |
| C | -5.41750900 | -1.87148400 | 0.44845400  |
| H | -3.68956900 | -2.18810100 | 1.67311100  |
| C | -5.91023900 | -1.40610900 | -0.77895600 |
| H | -5.36620200 | -0.61679600 | -2.72549900 |
| H | -6.12754200 | -2.20075700 | 1.20003000  |
| C | -0.52445900 | -2.50529000 | -0.78068900 |
| C | 0.75920100  | -2.90134200 | -0.38511200 |
| C | -1.05530900 | -3.07716100 | -1.95209100 |
| C | 1.52078100  | -3.78774600 | -1.14406500 |
| H | 1.18840800  | -2.50601800 | 0.52517800  |
| C | -0.30648100 | -3.95905400 | -2.71912300 |
| H | -2.05910600 | -2.82718500 | -2.27597300 |
| C | 1.00289100  | -4.29236100 | -2.34194600 |
| H | 2.51809400  | -4.04495800 | -0.80807800 |
| H | -0.70426200 | -4.38497300 | -3.63440700 |
| C | -2.55954500 | 1.70689100  | -0.36624800 |
| C | -3.56170200 | 1.60303200  | 0.59904500  |
| C | -2.92746200 | 2.16924200  | -1.64051500 |
| C | -4.90362000 | 1.86211100  | 0.29863000  |
| H | -3.32713000 | 1.27575600  | 1.60624700  |
| C | -4.26084700 | 2.42957300  | -1.95836700 |
| H | -2.17188700 | 2.31958400  | -2.40798400 |
| C | -5.26018500 | 2.24691500  | -0.99588300 |
| H | -5.65023500 | 1.72761700  | 1.07222400  |
| H | -4.54792500 | 2.76455100  | -2.95091600 |
| O | 1.68214200  | -5.09961300 | -3.20189500 |
| O | -7.26665200 | -1.36268600 | -0.90346500 |
| O | -0.44974000 | -1.89942900 | 5.96617300  |
| O | -6.55592700 | 2.44394100  | -1.42084100 |
| O | 3.24197100  | -2.36331900 | 4.69377400  |
| O | 5.47777500  | 5.40710400  | -0.86207900 |
| C | 0.20770000  | -3.05808600 | 6.46817300  |
| H | 1.15433400  | -3.22620900 | 5.94021600  |
| H | 0.40831200  | -2.85437100 | 7.52120300  |
| H | -0.42632100 | -3.95121000 | 6.39306800  |

|   |             |             |             |
|---|-------------|-------------|-------------|
| C | -7.80815000 | -0.82847200 | -2.10912200 |
| H | -7.54466400 | -1.44890500 | -2.97573400 |
| H | -8.89155300 | -0.83947600 | -1.97923500 |
| H | -7.46778500 | 0.20009800  | -2.27928100 |
| C | 3.07361200  | -5.28238900 | -2.98433000 |
| H | 3.27052600  | -5.86350200 | -2.07334600 |
| H | 3.44333600  | -5.83760700 | -3.84787200 |
| H | 3.59496700  | -4.31923600 | -2.91780900 |
| C | 4.07425500  | -3.51414200 | 4.68627000  |
| H | 4.10069900  | -3.87443500 | 5.71591800  |
| H | 3.66971200  | -4.30258400 | 4.03757000  |
| H | 5.09514400  | -3.27299000 | 4.36288500  |
| C | 6.57204900  | 5.64086200  | 0.01019400  |
| H | 7.03544200  | 6.56909000  | -0.32827400 |
| H | 6.24222300  | 5.76012900  | 1.05070400  |
| H | 7.31226000  | 4.83055900  | -0.03916900 |
| C | -7.58543000 | 2.33349000  | -0.45023600 |
| H | -7.44892000 | 3.05143900  | 0.36943300  |
| H | -8.51869200 | 2.55908200  | -0.97071600 |
| H | -7.64245500 | 1.31898900  | -0.03202000 |
| I | -0.23198000 | 3.67222600  | 0.71827500  |
| H | 5.14004300  | -1.43864100 | -3.33243400 |
| O | 3.36776200  | -2.47255500 | -5.15596300 |
| C | 4.71905700  | -2.77281000 | -5.46959900 |
| H | 5.19952600  | -3.36235700 | -4.67677800 |
| H | 4.69135800  | -3.36374500 | -6.38633100 |
| H | 5.30778300  | -1.86273800 | -5.64330500 |
| P | -1.37198000 | -1.11981200 | 0.08524800  |
| P | 1.81448600  | 0.68784300  | -0.28202100 |

(E) L

Total energy: -1379.92157124 Hartree

Free energy: -1379.606128 Hartree

|   |             |             |             |
|---|-------------|-------------|-------------|
| P | -0.00074100 | -0.00078700 | -1.75142600 |
| C | 0.54287200  | 1.56330400  | -0.92990700 |
| C | -0.03645500 | 2.09306100  | 0.22898800  |

|   |             |             |             |
|---|-------------|-------------|-------------|
| C | 1.61293700  | 2.26985400  | -1.51222700 |
| C | 0.42767800  | 3.28140700  | 0.80128400  |
| H | -0.86738200 | 1.57669900  | 0.69952000  |
| C | 2.09352000  | 3.44403200  | -0.95018600 |
| H | 2.07511600  | 1.89119400  | -2.42064300 |
| C | 1.50095200  | 3.96044100  | 0.21264500  |
| H | -0.05185400 | 3.66082300  | 1.69597200  |
| H | 2.91969200  | 3.98939900  | -1.39478200 |
| C | 1.08200400  | -1.25293600 | -0.92885400 |
| C | 1.16110800  | -2.53261800 | -1.51149100 |
| C | 1.82891900  | -1.01545800 | 0.23089500  |
| C | 1.93853900  | -3.53499800 | -0.94902100 |
| H | 0.60340400  | -2.74397400 | -2.42061600 |
| C | 2.62676300  | -2.01068000 | 0.80368200  |
| H | 1.79537300  | -0.03777100 | 0.70151500  |
| C | 2.68061100  | -3.27936900 | 0.21457800  |
| H | 1.99965000  | -4.52290100 | -1.39395100 |
| H | 3.19384900  | -1.78463700 | 1.69905500  |
| C | -1.62685500 | -0.31231900 | -0.92968200 |
| C | -2.77600500 | 0.24823500  | -1.51992200 |
| C | -1.79332000 | -1.06687200 | 0.23750500  |
| C | -4.03304300 | 0.07642900  | -0.95777400 |
| H | -2.68106300 | 0.82807500  | -2.43477500 |
| C | -3.05414700 | -1.25971700 | 0.81027100  |
| H | -0.92853400 | -1.51800200 | 0.71406200  |
| C | -4.18130900 | -0.68273800 | 0.21336800  |
| H | -4.92028700 | 0.50917400  | -1.40852900 |
| H | -3.14093600 | -1.85509000 | 1.71159000  |
| O | 2.03854700  | 5.12360700  | 0.68181400  |
| O | -5.45743300 | -0.80072800 | 0.68196800  |
| O | 3.42031900  | -4.32558800 | 0.68398300  |
| C | 4.20254500  | -4.12470400 | 1.85076100  |
| H | 4.70741600  | -5.07284400 | 2.04331000  |
| H | 4.95535000  | -3.33850900 | 1.70483500  |
| H | 3.58019900  | -3.86554000 | 2.71787400  |
| C | -5.67310900 | -1.56613700 | 1.85724300  |

|   |             |             |            |
|---|-------------|-------------|------------|
| H | -6.74704300 | -1.53126100 | 2.04799100 |
| H | -5.36444900 | -2.61159400 | 1.72361900 |
| H | -5.14020200 | -1.14482400 | 2.72029900 |
| C | 1.47415200  | 5.70150400  | 1.84847800 |
| H | 2.04451900  | 6.61167100  | 2.04139000 |
| H | 0.41744000  | 5.96242900  | 1.70221900 |
| H | 1.55926400  | 5.03263700  | 2.71550900 |

(F) L-PdAr-I

Total energy: -1865.55610707 Hartree

Free energy: -1865.131581 Hartree

|    |             |             |             |
|----|-------------|-------------|-------------|
| Pd | 0.07454800  | 1.72877800  | -0.31985400 |
| C  | -1.90534500 | -0.90454700 | -1.34859200 |
| C  | -2.98627600 | -1.78180300 | -1.19752900 |
| C  | -1.58817500 | -0.44418700 | -2.64112800 |
| C  | -3.73461200 | -2.20141700 | -2.29743900 |
| H  | -3.25929900 | -2.14197900 | -0.21053800 |
| C  | -2.32065600 | -0.85936100 | -3.74372900 |
| H  | -0.76420900 | 0.25159100  | -2.77783600 |
| C  | -3.40051300 | -1.74190300 | -3.57997100 |
| H  | -4.56793300 | -2.87645300 | -2.14485300 |
| H  | -2.08677700 | -0.50692300 | -4.74266000 |
| C  | 0.32388400  | -1.75083300 | 0.31227400  |
| C  | 1.13350600  | -1.71798100 | 1.45564600  |
| C  | 0.60686500  | -2.69814100 | -0.68440800 |
| C  | 2.22082000  | -2.57315700 | 1.59584700  |
| H  | 0.94107100  | -0.98669100 | 2.23415900  |
| C  | 1.69278200  | -3.55625200 | -0.55640000 |
| H  | -0.00859900 | -2.74854300 | -1.57710700 |
| C  | 2.52802400  | -3.47378700 | 0.56690500  |
| H  | 2.84556600  | -2.49210300 | 2.47578900  |
| H  | 1.93457100  | -4.27761900 | -1.32997100 |
| C  | -1.94483000 | -0.42329700 | 1.53164600  |
| C  | -2.57585800 | 0.75492300  | 1.95101500  |
| C  | -2.19497900 | -1.60888400 | 2.24865300  |
| C  | -3.44396400 | 0.76493500  | 3.04302800  |

|   |             |             |             |
|---|-------------|-------------|-------------|
| H | -2.38540600 | 1.68890600  | 1.42821600  |
| C | -3.05411900 | -1.61198800 | 3.33790600  |
| H | -1.70093600 | -2.53050100 | 1.95671400  |
| C | -3.68766500 | -0.42508100 | 3.74249500  |
| H | -3.90930400 | 1.69651100  | 3.34063300  |
| H | -3.25038500 | -2.51885500 | 3.90026100  |
| C | 1.91126500  | 0.99491900  | -0.13391700 |
| C | 2.43825600  | 0.18500100  | -1.13545500 |
| C | 2.63847200  | 1.22402500  | 1.03842800  |
| C | 3.66576200  | -0.46060900 | -0.94854200 |
| H | 1.88824900  | 0.00506700  | -2.05324600 |
| C | 3.86053500  | 0.57841300  | 1.22785500  |
| H | 2.25849500  | 1.88977100  | 1.80574000  |
| C | 4.36429000  | -0.28838400 | 0.24987400  |
| H | 4.03480200  | -1.11635600 | -1.72742000 |
| H | 4.43357800  | 0.72596600  | 2.13803100  |
| O | -4.50661100 | -0.53572000 | 4.82074300  |
| O | 3.62031400  | -4.28775900 | 0.56218300  |
| O | -4.05723600 | -2.08346200 | -4.71900200 |
| O | 5.53110900  | -0.94030800 | 0.56608300  |
| C | -5.17131000 | -2.96185600 | -4.62457700 |
| H | -5.96973600 | -2.53576900 | -4.00352100 |
| H | -5.53855900 | -3.09060100 | -5.64355500 |
| H | -4.88161300 | -3.93973500 | -4.21854200 |
| C | 4.52982700  | -4.19196900 | 1.65636200  |
| H | 4.05391000  | -4.48891500 | 2.59974200  |
| H | 5.34002200  | -4.88711900 | 1.43118700  |
| H | 4.93227600  | -3.17626400 | 1.75210500  |
| C | -5.16776600 | 0.63209900  | 5.29307100  |
| H | -5.83430200 | 1.05472600  | 4.53036300  |
| H | -5.76000600 | 0.31423600  | 6.15211700  |
| H | -4.45130500 | 1.40006100  | 5.61134900  |
| C | 6.10052300  | -1.78736700 | -0.42278000 |
| H | 6.33914300  | -1.23381100 | -1.34036000 |
| H | 7.02427900  | -2.17681100 | 0.00942000  |
| H | 5.43485500  | -2.62562700 | -0.66864700 |

|   |             |             |             |
|---|-------------|-------------|-------------|
| I | 0.72864900  | 4.23195500  | -0.76567400 |
| P | -0.85820900 | -0.38297700 | 0.06047600  |

(G) Transition state for the isomerization

(TS connecting between L-PdAr-I and Ar-PdL-I)

imaginary mode 25.99 i cm<sup>-1</sup>

Total energy: -1865.55271661 Hartree

Free energy: -1865.126228 Hartree

|    |             |             |             |
|----|-------------|-------------|-------------|
| Pd | 0.32335700  | -1.60492600 | -0.56982800 |
| P  | 0.42609200  | 0.55735000  | 0.15662900  |
| C  | 1.27844100  | 1.58061900  | -1.09636800 |
| C  | 1.97287300  | 2.74259000  | -0.73719100 |
| C  | 1.20235800  | 1.23172200  | -2.45773300 |
| C  | 2.57281300  | 3.55010600  | -1.70300600 |
| H  | 2.05684400  | 3.02427800  | 0.30798300  |
| C  | 1.79211100  | 2.02918700  | -3.42723600 |
| H  | 0.69060700  | 0.31977000  | -2.75294300 |
| C  | 2.48160000  | 3.19532400  | -3.05727400 |
| H  | 3.10664300  | 4.43991000  | -1.39237300 |
| H  | 1.74727900  | 1.76567700  | -4.47848400 |
| C  | -1.12764900 | 1.43781100  | 0.52670100  |
| C  | -1.91200200 | 0.97675100  | 1.59315600  |
| C  | -1.68095800 | 2.37871600  | -0.35685500 |
| C  | -3.22817600 | 1.39358700  | 1.75438700  |
| H  | -1.50813700 | 0.24364800  | 2.28399100  |
| C  | -2.99546600 | 2.80314800  | -0.20501900 |
| H  | -1.09179700 | 2.75769800  | -1.18584800 |
| C  | -3.79059900 | 2.27958700  | 0.82470500  |
| H  | -3.81552700 | 0.98421900  | 2.56598000  |
| H  | -3.44233800 | 3.50988400  | -0.89634600 |
| C  | 1.43196100  | 0.67123000  | 1.67850900  |
| C  | 2.45505100  | -0.26096600 | 1.90347500  |
| C  | 1.24000900  | 1.70211000  | 2.61804600  |
| C  | 3.27406600  | -0.17399900 | 3.02839800  |
| H  | 2.61701600  | -1.07427300 | 1.20071500  |
| C  | 2.04933000  | 1.79623700  | 3.74105800  |



|   |             |             |             |
|---|-------------|-------------|-------------|
| H | 0.44599600  | 2.42769900  | 2.47224500  |
| C | 3.07355500  | 0.85902800  | 3.95498600  |
| H | 4.05084700  | -0.91486000 | 3.17202700  |
| H | 1.90846700  | 2.58369600  | 4.47397800  |
| C | -1.65337700 | -1.48369200 | -0.41719100 |
| C | -2.42517800 | -0.77423800 | -1.33650500 |
| C | -2.28126000 | -2.14289400 | 0.64833500  |
| C | -3.81293400 | -0.68507800 | -1.18522000 |
| H | -1.95653900 | -0.23949000 | -2.15675700 |
| C | -3.66398300 | -2.05367400 | 0.80579400  |
| H | -1.69986500 | -2.71151100 | 1.36839400  |
| C | -4.43061100 | -1.29707500 | -0.09011800 |
| H | -4.38143800 | -0.10220900 | -1.89948500 |
| H | -4.16535000 | -2.54263700 | 1.63538000  |
| O | 3.80540000  | 1.03815900  | 5.08484400  |
| O | -5.09520000 | 2.66811600  | 0.83078800  |
| O | 3.02669000  | 3.90366000  | -4.07953900 |
| O | -5.76609700 | -1.18590500 | 0.20662600  |
| C | 3.76075600  | 5.08297700  | -3.77541800 |
| H | 4.62778600  | 4.86532000  | -3.13867900 |
| H | 4.10690200  | 5.47537500  | -4.73244700 |
| H | 3.13089900  | 5.83512900  | -3.28289200 |
| C | -5.96168600 | 2.08697700  | 1.80300200  |
| H | -5.66811900 | 2.36925000  | 2.82211400  |
| H | -6.95448200 | 2.48815800  | 1.59409100  |
| H | -5.98088000 | 0.99354200  | 1.71671500  |
| C | 4.85062900  | 0.11520600  | 5.36963000  |
| H | 5.61873100  | 0.12153100  | 4.58587200  |
| H | 5.29325600  | 0.44548400  | 6.31023800  |
| H | 4.46547300  | -0.90535900 | 5.48881200  |
| C | -6.58172700 | -0.44555000 | -0.69107700 |
| H | -6.57555100 | -0.88301100 | -1.69803500 |
| H | -7.59483100 | -0.49316600 | -0.28744100 |
| H | -6.26506700 | 0.60446800  | -0.75261300 |
| I | 1.90304400  | -3.63940800 | -1.20956800 |

(H) Ar-PdL-X

Total energy: -1865.55581910 Hartree

Free energy: -1865.129907 Hartree

|    |             |             |             |
|----|-------------|-------------|-------------|
| Pd | 0.14327300  | -0.56588500 | -1.78905100 |
| C  | 1.38404700  | 1.59620200  | 0.47611400  |
| C  | 1.95151600  | 1.96934400  | 1.70132800  |
| C  | 1.58189800  | 2.42419600  | -0.64241000 |
| C  | 2.69478500  | 3.14257200  | 1.82231700  |
| H  | 1.82493000  | 1.33880000  | 2.57594300  |
| C  | 2.31555300  | 3.59632600  | -0.53205500 |
| H  | 1.18089800  | 2.13344000  | -1.60797800 |
| C  | 2.87765600  | 3.96468900  | 0.70031000  |
| H  | 3.12650600  | 3.39941700  | 2.78189700  |
| H  | 2.48449700  | 4.23657800  | -1.39104800 |
| C  | -1.19680800 | 0.52623800  | 1.24000800  |
| C  | -2.08154500 | -0.50192800 | 1.59384200  |
| C  | -1.63775600 | 1.85577000  | 1.34192200  |
| C  | -3.38461500 | -0.22924900 | 1.99164600  |
| H  | -1.76671600 | -1.53703900 | 1.51549900  |
| C  | -2.93918900 | 2.14065800  | 1.73774000  |
| H  | -0.96932700 | 2.67101000  | 1.08385400  |
| C  | -3.83332400 | 1.09862300  | 2.02369600  |
| H  | -4.04892000 | -1.05242200 | 2.22016400  |
| H  | -3.29848900 | 3.16265300  | 1.79659300  |
| C  | 1.14848100  | -1.17574400 | 1.40826300  |
| C  | 2.08312100  | -2.05853400 | 0.85035200  |
| C  | 0.89427800  | -1.24974000 | 2.79263100  |
| C  | 2.75471200  | -2.98976000 | 1.64157300  |
| H  | 2.30081400  | -2.01965800 | -0.21219800 |
| C  | 1.55790800  | -2.17309700 | 3.58669900  |
| H  | 0.16707000  | -0.58641100 | 3.24933300  |
| C  | 2.49488900  | -3.05122200 | 3.01741800  |
| H  | 3.46946900  | -3.65568000 | 1.17390600  |
| H  | 1.36793700  | -2.23951000 | 4.65280400  |
| C  | -1.84209900 | -0.61830600 | -1.54655200 |
| C  | -2.60522700 | 0.55048100  | -1.63011000 |

|   |             |             |             |
|---|-------------|-------------|-------------|
| C | -2.50432500 | -1.83810000 | -1.33028200 |
| C | -3.99568900 | 0.52197000  | -1.49026200 |
| H | -2.12022200 | 1.51384500  | -1.76044400 |
| C | -3.89064900 | -1.87826100 | -1.18525800 |
| H | -1.94058500 | -2.76448300 | -1.25016300 |
| C | -4.63803900 | -0.69407700 | -1.23442300 |
| H | -4.54973100 | 1.45165000  | -1.53787200 |
| H | -4.41115300 | -2.81360800 | -1.00305300 |
| O | 3.08612100  | -3.91764800 | 3.88000200  |
| O | -5.11409100 | 1.46519900  | 2.30086400  |
| O | 3.58154700  | 5.12658900  | 0.70152800  |
| O | -5.98108300 | -0.81909500 | -0.98091700 |
| C | 4.20529700  | 5.54243700  | 1.90926900  |
| H | 4.94135100  | 4.80644100  | 2.25744200  |
| H | 4.71513800  | 6.47828500  | 1.67659300  |
| H | 3.46934800  | 5.72018100  | 2.70433600  |
| C | -6.07250200 | 0.43279900  | 2.51991200  |
| H | -5.83616100 | -0.15022800 | 3.41929100  |
| H | -7.02802100 | 0.93922300  | 2.66418200  |
| H | -6.13978800 | -0.24103500 | 1.65668300  |
| C | 4.04597300  | -4.83493700 | 3.36752400  |
| H | 4.90252800  | -4.31437300 | 2.92093600  |
| H | 4.38597600  | -5.42097000 | 4.22238400  |
| H | 3.60316500  | -5.50632000 | 2.62094100  |
| C | -6.78580300 | 0.34615000  | -1.09643200 |
| H | -6.73829200 | 0.77120400  | -2.10757500 |
| H | -7.80922000 | 0.02856300  | -0.88842500 |
| H | -6.49150100 | 1.11665500  | -0.37093400 |
| I | 2.59130700  | -0.68293100 | -2.89951600 |
| P | 0.34689700  | 0.09510200  | 0.36580800  |

(I) Cation- $\pi$  complex between Ar-PdL-X and vinylSnBu<sub>3</sub>

Total energy: -2420.59056550 Hartree

Free energy: -2419.788602 Hartree

|    |            |             |             |
|----|------------|-------------|-------------|
| Pd | 0.05469200 | -0.26235500 | -0.84732600 |
| C  | 1.97328800 | -1.28756900 | 1.92719700  |

|   |             |             |             |
|---|-------------|-------------|-------------|
| C | 3.03588200  | -2.00981200 | 2.49578400  |
| C | 0.80665300  | -1.11182500 | 2.67678500  |
| C | 2.92846100  | -2.53298500 | 3.77653300  |
| H | 3.94745200  | -2.17746700 | 1.93183500  |
| C | 0.68926500  | -1.62060600 | 3.96963600  |
| H | -0.03457500 | -0.58834200 | 2.24101100  |
| C | 1.75565100  | -2.33981900 | 4.52475100  |
| H | 3.73689500  | -3.10259700 | 4.22263000  |
| H | -0.23588600 | -1.47128400 | 4.51251600  |
| C | 2.99573000  | 1.06738100  | 0.65626100  |
| C | 3.74682100  | 1.72767400  | -0.33498400 |
| C | 2.83176500  | 1.69831300  | 1.89342400  |
| C | 4.30267900  | 2.97323900  | -0.09543600 |
| H | 3.87407200  | 1.27468200  | -1.31101400 |
| C | 3.38149600  | 2.95779700  | 2.14517600  |
| H | 2.26660500  | 1.21229100  | 2.68154700  |
| C | 4.11579500  | 3.60480600  | 1.14467900  |
| H | 4.86712800  | 3.49352400  | -0.86158000 |
| H | 3.22777100  | 3.41452500  | 3.11520900  |
| C | 3.28439700  | -1.48650900 | -0.69127000 |
| C | 2.80402500  | -2.42270200 | -1.61633900 |
| C | 4.67755400  | -1.37389700 | -0.51370700 |
| C | 3.67616300  | -3.23126600 | -2.34606600 |
| H | 1.73478000  | -2.54068500 | -1.75913000 |
| C | 5.55336300  | -2.17231600 | -1.23443600 |
| H | 5.07952900  | -0.64873600 | 0.18644300  |
| C | 5.05895200  | -3.10934500 | -2.15654900 |
| H | 3.26592700  | -3.94647500 | -3.04843700 |
| H | 6.62749400  | -2.09139700 | -1.10486500 |
| C | 0.80860700  | 1.46754000  | -1.59409100 |
| C | 0.65523200  | 2.70671400  | -0.95083000 |
| C | 1.49356300  | 1.43605000  | -2.81071000 |
| C | 1.18054400  | 3.87040300  | -1.50237900 |
| H | 0.14328100  | 2.76893600  | 0.00445300  |
| C | 2.03475500  | 2.60152300  | -3.37655300 |
| H | 1.63981100  | 0.49324200  | -3.33291100 |

|    |             |             |             |
|----|-------------|-------------|-------------|
| C  | 1.88226500  | 3.82394300  | -2.71577700 |
| H  | 1.07749600  | 4.82819900  | -1.00181100 |
| H  | 2.56898000  | 2.53383800  | -4.31745200 |
| C  | -2.04650000 | 0.59473000  | -1.57032200 |
| C  | -1.58949000 | -0.27221000 | -2.52866100 |
| H  | -1.79179000 | 1.64383100  | -1.72635900 |
| H  | -1.02539900 | 0.08686500  | -3.38974500 |
| I  | -0.86626300 | -2.80761700 | -0.08219400 |
| O  | 2.37949900  | 5.02060700  | -3.15831900 |
| C  | 3.11829200  | 5.02714000  | -4.36697400 |
| H  | 3.42717200  | 6.06140100  | -4.52944800 |
| H  | 4.01230500  | 4.39112400  | -4.30202800 |
| H  | 2.51022700  | 4.69563700  | -5.22007700 |
| Sn | -3.59875300 | 0.24903500  | -0.06426600 |
| C  | -4.93027100 | 1.96302200  | -0.37575900 |
| H  | -4.37520800 | 2.88047600  | -0.14065600 |
| H  | -5.17537700 | 2.01923300  | -1.44379000 |
| C  | -4.70830400 | -1.57839900 | -0.46789600 |
| H  | -5.50945200 | -1.65339400 | 0.27856800  |
| C  | -2.75289300 | 0.44912000  | 1.93727100  |
| H  | -3.58556200 | 0.58495600  | 2.63904100  |
| H  | -2.26532500 | -0.49636500 | 2.19601300  |
| C  | -6.22039000 | 1.89988600  | 0.45658200  |
| H  | -6.77371800 | 0.97844400  | 0.22304600  |
| H  | -5.97673100 | 1.83902000  | 1.52776900  |
| C  | -7.15035800 | 3.10146300  | 0.23310700  |
| H  | -6.60457800 | 4.02473400  | 0.47103100  |
| H  | -7.40195200 | 3.16373000  | -0.83439900 |
| C  | -8.43514200 | 3.02982900  | 1.06473500  |
| H  | -8.20903400 | 2.99634000  | 2.13698400  |
| H  | -9.08047300 | 3.89658100  | 0.88712900  |
| H  | -9.01145600 | 2.12939200  | 0.82208400  |
| H  | -1.89074300 | -1.31564000 | -2.55457800 |
| C  | -1.77222200 | 1.62677900  | 2.04416600  |
| H  | -0.90820300 | 1.44017000  | 1.39087000  |
| H  | -2.24018100 | 2.54721700  | 1.66427400  |

|   |             |             |             |
|---|-------------|-------------|-------------|
| C | -1.26393800 | 1.89821400  | 3.46728100  |
| H | -0.74291200 | 1.00872600  | 3.84373500  |
| H | -2.12326300 | 2.05521700  | 4.13319700  |
| C | -0.32725400 | 3.10969500  | 3.53228300  |
| H | 0.05698800  | 3.27092800  | 4.54544500  |
| H | 0.53059700  | 2.97900500  | 2.86389100  |
| H | -0.84712200 | 4.02416300  | 3.22325700  |
| H | -4.02962500 | -2.41911900 | -0.29828000 |
| C | -5.29898500 | -1.63543500 | -1.88489100 |
| H | -5.96463300 | -0.77678900 | -2.05755400 |
| H | -4.49567800 | -1.54793200 | -2.63011900 |
| C | -6.08006200 | -2.92959600 | -2.15491500 |
| H | -6.88730900 | -3.02193500 | -1.41537800 |
| H | -5.41435700 | -3.78696300 | -1.98925200 |
| C | -6.66435700 | -2.99143600 | -3.56982900 |
| H | -5.87208800 | -2.93128900 | -4.32517000 |
| H | -7.21546100 | -3.92260200 | -3.73868600 |
| H | -7.35400900 | -2.15805200 | -3.74891700 |
| O | 5.99921600  | -3.84116800 | -2.81087100 |
| O | 4.68595800  | 4.83400500  | 1.27166200  |
| O | 1.75403900  | -2.89045300 | 5.76863700  |
| C | 4.49172500  | 5.54337600  | 2.48683000  |
| H | 5.00294700  | 6.49919000  | 2.36280800  |
| H | 3.42678000  | 5.72508700  | 2.68254400  |
| H | 4.92717500  | 5.00975500  | 3.34204200  |
| C | 5.56396200  | -4.81916000 | -3.74709900 |
| H | 5.00444900  | -4.36484700 | -4.57502100 |
| H | 6.47002500  | -5.28424500 | -4.13802100 |
| H | 4.94027000  | -5.58552900 | -3.26951300 |
| C | 0.57772500  | -2.76924200 | 6.55698900  |
| H | 0.78872300  | -3.28757700 | 7.49353200  |
| H | 0.34051500  | -1.71877100 | 6.77128900  |
| H | -0.28531600 | -3.23970800 | 6.06862200  |
| P | 2.10062800  | -0.49089200 | 0.28500900  |

(J) Transition state for the transmetalation

imaginary mode 38.06 i cm<sup>-1</sup>

Total energy: -2420.55990952 Hartree

Free energy: -2419.754448 Hartree

|    |             |             |             |
|----|-------------|-------------|-------------|
| Pd | -0.23987300 | -0.52751600 | -1.38166800 |
| C  | -0.70217600 | 1.28189100  | 1.57016700  |
| C  | -0.11613100 | 2.53806000  | 1.75669900  |
| C  | -0.44276300 | 0.28245600  | 2.52929400  |
| C  | 0.68111000  | 2.81139500  | 2.87286400  |
| H  | -0.27569800 | 3.32219100  | 1.02509300  |
| C  | 0.34924700  | 0.53825600  | 3.63960100  |
| H  | -0.88750800 | -0.70122100 | 2.41476200  |
| C  | 0.91220600  | 1.81121500  | 3.82374500  |
| H  | 1.11138900  | 3.79933800  | 2.98477200  |
| H  | 0.53804000  | -0.22569800 | 4.38669300  |
| C  | -3.21492700 | 0.13313300  | 0.68702000  |
| C  | -4.03964200 | -0.54931400 | -0.22763800 |
| C  | -3.66058000 | 0.27059300  | 2.00497400  |
| C  | -5.25288700 | -1.08713700 | 0.16817200  |
| H  | -3.71069200 | -0.68866500 | -1.25095200 |
| C  | -4.88118700 | -0.27127400 | 2.41936000  |
| H  | -3.05503900 | 0.79855100  | 2.73440400  |
| C  | -5.68096300 | -0.95841500 | 1.49895600  |
| H  | -5.87913900 | -1.63336700 | -0.52878500 |
| H  | -5.18989300 | -0.15101300 | 3.45093100  |
| C  | -2.19349400 | 2.43432700  | -0.65656300 |
| C  | -1.98057700 | 2.70790800  | -2.01840500 |
| C  | -2.89474600 | 3.37382900  | 0.11032100  |
| C  | -2.44111300 | 3.88806000  | -2.58807800 |
| H  | -1.44715500 | 1.99093500  | -2.63389700 |
| C  | -3.35556800 | 4.56675300  | -0.44524900 |
| H  | -3.09019500 | 3.17362100  | 1.16012200  |
| C  | -3.12708200 | 4.82794200  | -1.80474800 |
| H  | -2.28096800 | 4.10737300  | -3.63841600 |
| H  | -3.89142800 | 5.27218300  | 0.17836500  |
| C  | -1.41531200 | -2.15881900 | -1.17709300 |
| C  | -1.60746000 | -2.78010100 | 0.06895000  |

|    |             |             |             |
|----|-------------|-------------|-------------|
| C  | -2.14514500 | -2.65643900 | -2.26328800 |
| C  | -2.50993100 | -3.82844800 | 0.23022000  |
| H  | -1.06233300 | -2.43648700 | 0.94192600  |
| C  | -3.07235500 | -3.69799500 | -2.11467200 |
| H  | -2.00414200 | -2.22632000 | -3.25036900 |
| C  | -3.26053500 | -4.28576800 | -0.85952300 |
| H  | -2.66390800 | -4.29589600 | 1.19827400  |
| H  | -3.62566600 | -4.03938300 | -2.98249000 |
| C  | 1.40939900  | -1.40074800 | -3.75626600 |
| C  | 0.88063600  | -1.75930200 | -2.57616800 |
| Sn | 2.87052500  | -0.55472200 | -0.11930200 |
| C  | 4.27670500  | -1.35781400 | -1.57569600 |
| H  | 3.79223800  | -2.24310400 | -1.99778000 |
| H  | 5.14493300  | -1.69984900 | -0.99514300 |
| C  | 1.82783400  | -2.15267000 | 0.93826600  |
| H  | 1.17634900  | -2.65102500 | 0.21972400  |
| H  | 1.19010600  | -1.68187300 | 1.69019700  |
| C  | 3.74654500  | 0.83967500  | 1.32272900  |
| H  | 4.64992100  | 1.25767800  | 0.86195000  |
| H  | 3.03516700  | 1.66452200  | 1.43094800  |
| H  | 0.98922600  | -2.80731800 | -2.28512400 |
| H  | 1.93208200  | -2.11598700 | -4.39548500 |
| H  | 1.35163300  | -0.38368200 | -4.13804200 |
| O  | 1.66128100  | 1.96792500  | 4.95266500  |
| O  | -3.53313300 | 5.95317100  | -2.45449700 |
| O  | -6.88077900 | -1.53487200 | 1.79025400  |
| C  | -7.35242500 | -1.46881700 | 3.12707200  |
| H  | -8.30479500 | -2.00133700 | 3.13803800  |
| H  | -6.65893300 | -1.95519300 | 3.82592100  |
| H  | -7.51618800 | -0.43175800 | 3.44966200  |
| C  | -4.24050700 | 6.94132100  | -1.71976900 |
| H  | -4.46287700 | 7.74104600  | -2.42786500 |
| H  | -5.18134600 | 6.54791400  | -1.31277300 |
| H  | -3.63551600 | 7.34579400  | -0.89747900 |
| C  | 2.09584400  | 3.27672800  | 5.29836000  |
| H  | 1.24584900  | 3.96187700  | 5.41066100  |



|   |             |             |             |
|---|-------------|-------------|-------------|
| H | 2.61490300  | 3.17736300  | 6.25243900  |
| H | 2.79191600  | 3.68610600  | 4.55596600  |
| C | 4.05412900  | 0.23216500  | 2.69787000  |
| H | 3.12466300  | -0.13679600 | 3.15079400  |
| H | 4.71963900  | -0.63816400 | 2.60728100  |
| C | 4.70182800  | 1.24575300  | 3.65282200  |
| H | 4.10082200  | 2.16259300  | 3.64485600  |
| H | 5.69021600  | 1.52540700  | 3.26415600  |
| C | 4.82201600  | 0.72487300  | 5.08742000  |
| H | 5.32332200  | 1.44996700  | 5.73804000  |
| H | 3.82841100  | 0.52836900  | 5.50334500  |
| H | 5.39787900  | -0.20724400 | 5.12446800  |
| C | 4.71339100  | -0.40690100 | -2.69311200 |
| H | 3.82886800  | -0.06009300 | -3.23914900 |
| H | 5.18483600  | 0.49135700  | -2.26971500 |
| C | 5.68273400  | -1.06581500 | -3.68454100 |
| H | 5.20162800  | -1.95689300 | -4.11019200 |
| H | 6.57147100  | -1.42433600 | -3.14678100 |
| C | 6.10527600  | -0.11916900 | -4.81252400 |
| H | 6.79029500  | -0.60708700 | -5.51398100 |
| H | 5.23367300  | 0.22602300  | -5.38020800 |
| H | 6.61085100  | 0.76802200  | -4.41368800 |
| C | 2.79054300  | -3.15590100 | 1.59213200  |
| H | 3.45535500  | -2.65282500 | 2.30725400  |
| H | 3.44189200  | -3.61232800 | 0.83312700  |
| C | 2.03220300  | -4.27317300 | 2.32766400  |
| H | 1.38800500  | -3.81887900 | 3.09291200  |
| H | 1.35873400  | -4.77263400 | 1.61911300  |
| C | 2.96443800  | -5.30035000 | 2.97730300  |
| H | 3.62737900  | -4.82441900 | 3.70935900  |
| H | 2.40039100  | -6.08232800 | 3.49617300  |
| H | 3.59699400  | -5.78781600 | 2.22653900  |
| P | -1.63999400 | 0.83571000  | 0.05297700  |
| I | 1.62358700  | 1.68370000  | -1.63234400 |
| O | -4.13895900 | -5.30534200 | -0.59324600 |
| C | -4.94529200 | -5.77782500 | -1.65622800 |

|   |             |             |             |
|---|-------------|-------------|-------------|
| H | -5.57756000 | -6.56198300 | -1.23480500 |
| H | -5.58457400 | -4.98418000 | -2.06835300 |
| H | -4.34281100 | -6.20285200 | -2.47130700 |

(K) Complex between vinyl-PdAr-L and Bu<sub>3</sub>SnI

Total energy: -2420.56373281 Hartree

Free energy: -2419.761316 Hartree

|    |             |             |             |
|----|-------------|-------------|-------------|
| Pd | 0.53561600  | 0.85840300  | -1.21745400 |
| C  | 0.79754700  | -1.63611200 | 1.19360400  |
| C  | 0.45053100  | -2.98921400 | 1.17517800  |
| C  | 0.20152100  | -0.81170100 | 2.16809300  |
| C  | -0.45720000 | -3.52074300 | 2.09719200  |
| H  | 0.87749600  | -3.64720400 | 0.42615600  |
| C  | -0.69203600 | -1.32604500 | 3.09566500  |
| H  | 0.44171000  | 0.24639200  | 2.19861600  |
| C  | -1.03319500 | -2.68813400 | 3.06227800  |
| H  | -0.70466100 | -4.57419600 | 2.04668300  |
| H  | -1.14208100 | -0.69558100 | 3.85553800  |
| C  | 3.33299800  | -0.26526000 | 0.83029000  |
| C  | 4.28663500  | 0.48198700  | 0.11130600  |
| C  | 3.55191200  | -0.48680700 | 2.19158700  |
| C  | 5.40862000  | 0.99611300  | 0.73727100  |
| H  | 4.12524100  | 0.69326900  | -0.94015100 |
| C  | 4.68053700  | 0.03006400  | 2.83764200  |
| H  | 2.83836400  | -1.06226900 | 2.77228600  |
| C  | 5.61072300  | 0.78012600  | 2.11047100  |
| H  | 6.13274200  | 1.59324000  | 0.19387300  |
| H  | 4.81566700  | -0.15727700 | 3.89619700  |
| C  | 2.50412300  | -2.20529600 | -1.10677100 |
| C  | 2.15884400  | -2.29252400 | -2.46678800 |
| C  | 3.37684800  | -3.16542200 | -0.57750000 |
| C  | 2.65548300  | -3.31604600 | -3.26354100 |
| H  | 1.50140900  | -1.54737000 | -2.90333400 |
| C  | 3.88023300  | -4.20118200 | -1.36429000 |
| H  | 3.67806900  | -3.10084700 | 0.46444400  |
| C  | 3.51573100  | -4.28018500 | -2.71676500 |

|    |             |             |             |
|----|-------------|-------------|-------------|
| H  | 2.39696700  | -3.38917200 | -4.31463900 |
| H  | 4.55359900  | -4.92582500 | -0.92250400 |
| C  | 1.77500800  | 2.34731000  | -0.68305900 |
| C  | 1.88004500  | 2.74378300  | 0.66137700  |
| C  | 2.61814100  | 2.96861200  | -1.61016600 |
| C  | 2.81443600  | 3.69235800  | 1.06860500  |
| H  | 1.24353100  | 2.29291500  | 1.41728600  |
| C  | 3.57506700  | 3.91460200  | -1.21340600 |
| H  | 2.54523300  | 2.71414700  | -2.66339000 |
| C  | 3.67947100  | 4.27434100  | 0.13395200  |
| H  | 2.90385600  | 3.98447900  | 2.11057700  |
| H  | 4.21898600  | 4.35944900  | -1.96394100 |
| C  | -1.35793200 | 2.21590600  | -3.15083000 |
| C  | -0.58539700 | 2.34476800  | -2.05956700 |
| Sn | -3.35949100 | 0.08578900  | -0.19789600 |
| C  | -4.31279600 | -1.52423900 | 0.92859900  |
| H  | -5.29320100 | -1.71259100 | 0.47478400  |
| H  | -3.70885600 | -2.42386900 | 0.76866000  |
| C  | -4.61199800 | 1.02366900  | -1.70681700 |
| H  | -3.93701700 | 1.65364500  | -2.29507800 |
| H  | -4.97473300 | 0.23186500  | -2.37192900 |
| C  | -2.22725100 | 1.49778700  | 1.00792900  |
| H  | -2.32560800 | 1.21140600  | 2.06073000  |
| H  | -1.18208100 | 1.35200100  | 0.71594300  |
| H  | -0.54710000 | 3.33790200  | -1.60540100 |
| H  | -1.92292700 | 3.05800800  | -3.55916300 |
| H  | -1.46004600 | 1.27832900  | -3.69367500 |
| C  | -2.63575400 | 2.95887600  | 0.77171600  |
| H  | -2.65076200 | 3.16907100  | -0.30455400 |
| H  | -3.65566100 | 3.13823500  | 1.14165100  |
| C  | -4.44744200 | -1.23724800 | 2.43116900  |
| H  | -3.45299800 | -1.08819600 | 2.86696100  |
| H  | -5.00241400 | -0.30335300 | 2.60243800  |
| C  | -5.78324400 | 1.84338900  | -1.14332500 |
| H  | -5.40802600 | 2.62828500  | -0.47278500 |
| H  | -6.44096300 | 1.20731000  | -0.53275700 |

|   |             |             |             |
|---|-------------|-------------|-------------|
| C | -6.62269700 | 2.50351200  | -2.24797400 |
| H | -5.96793300 | 3.13985800  | -2.85778000 |
| H | -7.00518500 | 1.72444900  | -2.92098800 |
| C | -1.67391300 | 3.94830600  | 1.44474900  |
| H | -0.66405300 | 3.77709800  | 1.05387800  |
| H | -1.63193100 | 3.73862000  | 2.52302300  |
| C | -5.14816400 | -2.37365500 | 3.18932800  |
| H | -4.64711700 | -3.31916100 | 2.94655500  |
| H | -6.17907000 | -2.47266100 | 2.82336500  |
| C | -5.14210800 | -2.16477900 | 4.70647500  |
| H | -5.66150700 | -2.97681600 | 5.22701700  |
| H | -4.11328200 | -2.12227600 | 5.07891200  |
| H | -5.63872300 | -1.22624500 | 4.97897500  |
| C | -7.78700400 | 3.33256600  | -1.69689500 |
| H | -7.42453400 | 4.13608600  | -1.04534900 |
| H | -8.36842500 | 3.79321400  | -2.50217500 |
| H | -8.46970300 | 2.71081500  | -1.10593700 |
| C | -2.07158200 | 5.40891100  | 1.21270400  |
| H | -1.36750200 | 6.09618200  | 1.69274600  |
| H | -2.08602600 | 5.64193800  | 0.14169000  |
| H | -3.07126700 | 5.61906300  | 1.61160800  |
| O | -1.93306700 | -3.09335500 | 4.00461700  |
| O | 6.73721700  | 1.34122400  | 2.63366500  |
| O | 3.94660200  | -5.24171300 | -3.57859900 |
| C | -2.28686600 | -4.46865000 | 4.05248000  |
| H | -3.01333600 | -4.56231300 | 4.86056700  |
| H | -2.74911600 | -4.80092000 | 3.11426800  |
| H | -1.41515200 | -5.10005600 | 4.26734400  |
| C | 6.96984000  | 1.20736000  | 4.02693100  |
| H | 7.89571700  | 1.74722200  | 4.23207600  |
| H | 6.15600700  | 1.64874500  | 4.61740600  |
| H | 7.09412700  | 0.15594300  | 4.31965900  |
| C | 4.83141800  | -6.24025200 | -3.09168800 |
| H | 5.04329700  | -6.89367900 | -3.93934400 |
| H | 5.77153700  | -5.80588800 | -2.72701400 |
| H | 4.37334500  | -6.83056000 | -2.28704700 |

|   |             |             |             |
|---|-------------|-------------|-------------|
| I | -1.52380000 | -1.36478700 | -1.84654900 |
| O | 4.58030900  | 5.17860300  | 0.63821500  |
| C | 5.50762200  | 5.75796700  | -0.25992500 |
| H | 6.13718900  | 4.99774900  | -0.74401200 |
| H | 5.00939300  | 6.35046100  | -1.04022800 |
| H | 6.14073400  | 6.41733600  | 0.33737600  |
| P | 1.84782700  | -0.83330800 | -0.08454700 |

(L) vinyl-PdAr-L

Total energy: -1932.05773671 Hartree

Free energy: -1931.595553 Hartree

|    |             |             |             |
|----|-------------|-------------|-------------|
| Pd | 0.32653500  | -0.52421800 | -2.37755900 |
| C  | -2.52933100 | 0.30136100  | -0.40806500 |
| C  | -3.46173500 | -0.04966400 | 0.57454000  |
| C  | -2.99156200 | 0.96485800  | -1.56116700 |
| C  | -4.81808500 | 0.24620700  | 0.42532900  |
| H  | -3.13229900 | -0.56791700 | 1.46983700  |
| C  | -4.33526100 | 1.27340700  | -1.71882600 |
| H  | -2.28669000 | 1.24727800  | -2.34008700 |
| C  | -5.25996700 | 0.91311800  | -0.72560800 |
| H  | -5.51302000 | -0.04647200 | 1.20325000  |
| H  | -4.69925500 | 1.78375300  | -2.60431200 |
| C  | -0.06377000 | 1.39880600  | 0.64980700  |
| C  | 1.29117000  | 1.38877800  | 1.04201700  |
| C  | -0.82933300 | 2.53490100  | 0.92967000  |
| C  | 1.84738500  | 2.47819000  | 1.69340100  |
| H  | 1.91412600  | 0.52489700  | 0.84004700  |
| C  | -0.27505500 | 3.64190900  | 1.57997100  |
| H  | -1.87544300 | 2.56927800  | 0.64270700  |
| C  | 1.07040400  | 3.61627800  | 1.96379600  |
| H  | 2.88949500  | 2.47560800  | 1.99524900  |
| H  | -0.89918700 | 4.50488000  | 1.77877300  |
| C  | -0.61511600 | -1.42154900 | 0.93476300  |
| C  | -0.59828600 | -2.74031800 | 0.44279400  |
| C  | -0.53816600 | -1.22694300 | 2.31816200  |
| C  | -0.51894200 | -3.82322600 | 1.30544700  |

|   |             |             |             |
|---|-------------|-------------|-------------|
| H | -0.63196500 | -2.91184700 | -0.63035000 |
| C | -0.45226300 | -2.30795800 | 3.19885000  |
| H | -0.53120200 | -0.21881300 | 2.72111200  |
| C | -0.44365400 | -3.61418300 | 2.69236900  |
| H | -0.49856000 | -4.84260000 | 0.93447800  |
| H | -0.38679500 | -2.12001300 | 4.26376100  |
| C | 2.18280000  | -0.48996600 | -1.64653100 |
| C | 2.99904900  | 0.62324100  | -1.85648100 |
| C | 2.62436500  | -1.49395000 | -0.76947600 |
| C | 4.20713700  | 0.77666300  | -1.16166700 |
| H | 2.69394800  | 1.40348900  | -2.54693900 |
| C | 3.82683400  | -1.35233000 | -0.07888100 |
| H | 2.01991200  | -2.37697900 | -0.59146600 |
| C | 4.61978500  | -0.21037100 | -0.26118000 |
| H | 4.80346900  | 1.66547100  | -1.33304700 |
| H | 4.16961800  | -2.11608500 | 0.61263900  |
| C | 0.71554500  | -1.94358200 | -4.91899600 |
| C | 1.14607300  | -0.91934800 | -4.16518200 |
| H | 1.88950300  | -0.23788800 | -4.58846600 |
| H | 1.03476400  | -2.08077900 | -5.95483200 |
| H | 0.02031000  | -2.69511800 | -4.54489500 |
| O | -6.55378300 | 1.25182200  | -0.97697300 |
| O | 1.71703700  | 4.63319100  | 2.60131200  |
| O | -0.35884500 | -4.74019000 | 3.45207700  |
| C | -7.54314000 | 0.90277700  | -0.01886500 |
| H | -8.49162100 | 1.26031100  | -0.42227400 |
| H | -7.59934400 | -0.18382500 | 0.12727300  |
| H | -7.35768200 | 1.38608700  | 0.94942200  |
| C | 0.98898100  | 5.81727400  | 2.88910900  |
| H | 1.69055500  | 6.49033300  | 3.38459300  |
| H | 0.61462400  | 6.29572100  | 1.97436200  |
| H | 0.14284500  | 5.62061200  | 3.56112700  |
| C | -0.25040600 | -4.59840200 | 4.86143300  |
| H | -0.18520800 | -5.61129000 | 5.26150500  |
| H | 0.65143100  | -4.03955300 | 5.14357700  |
| H | -1.13032200 | -4.09831900 | 5.28729700  |

|   |             |             |             |
|---|-------------|-------------|-------------|
| O | 5.77179300  | -0.16180200 | 0.48123600  |
| C | 6.59749800  | 0.98089000  | 0.34760600  |
| H | 6.07024100  | 1.90187900  | 0.63457600  |
| H | 7.44169700  | 0.82767800  | 1.02275700  |
| H | 6.97485200  | 1.09611200  | -0.67796900 |
| P | -0.73271600 | -0.04381700 | -0.26773500 |

(M) Transition state for the reductive elimination

imaginary mode 273.29 i cm<sup>-1</sup>

Total energy: -1932.05184893 Hartree

Free energy: -1931.586927 Hartree

|    |             |             |             |
|----|-------------|-------------|-------------|
| Pd | 0.43455300  | 0.32626000  | 2.31931400  |
| P  | -0.87587500 | 0.07471800  | 0.36544900  |
| C  | -2.21899500 | -1.17807100 | 0.41330700  |
| C  | -3.31561800 | -1.17001000 | -0.45611500 |
| C  | -2.12189700 | -2.22048800 | 1.35428000  |
| C  | -4.29272000 | -2.16580800 | -0.40141000 |
| H  | -3.42200400 | -0.37259900 | -1.18514000 |
| C  | -3.08030300 | -3.22277600 | 1.41394500  |
| H  | -1.28165900 | -2.23966800 | 2.04442900  |
| C  | -4.17509500 | -3.20130100 | 0.53591600  |
| H  | -5.13226200 | -2.12294000 | -1.08493400 |
| H  | -3.01283200 | -4.02888700 | 2.13706500  |
| C  | 0.22606300  | -0.50883500 | -0.98561800 |
| C  | 1.28418000  | 0.33056000  | -1.38434300 |
| C  | 0.16592700  | -1.80014600 | -1.51447000 |
| C  | 2.25197200  | -0.11261800 | -2.26999700 |
| H  | 1.37398200  | 1.32614800  | -0.96346300 |
| C  | 1.14272000  | -2.26397700 | -2.40367100 |
| H  | -0.63960700 | -2.46849900 | -1.22667700 |
| C  | 2.19740600  | -1.42252400 | -2.77005500 |
| H  | 3.08810800  | 0.51879900  | -2.55007600 |
| H  | 1.07168200  | -3.27532900 | -2.78599200 |
| C  | -1.66473100 | 1.57461000  | -0.33508000 |
| C  | -2.11955000 | 2.56805500  | 0.55116400  |
| C  | -1.84236900 | 1.77817200  | -1.70889000 |

|   |             |             |             |
|---|-------------|-------------|-------------|
| C | -2.74721900 | 3.71251000  | 0.08075300  |
| H | -1.96634900 | 2.44082900  | 1.61994500  |
| C | -2.46619100 | 2.92820900  | -2.19780000 |
| H | -1.47757500 | 1.03695600  | -2.41386800 |
| C | -2.92568200 | 3.90040600  | -1.29919500 |
| H | -3.09828800 | 4.48510600  | 0.75682900  |
| H | -2.58111700 | 3.05564900  | -3.26755100 |
| C | 2.41797500  | 0.38906800  | 1.82640400  |
| C | 3.02295900  | -0.81088500 | 1.43472700  |
| C | 2.98148200  | 1.59669600  | 1.37454500  |
| C | 4.09650000  | -0.82327100 | 0.53604200  |
| H | 2.63463900  | -1.75852200 | 1.79568000  |
| C | 4.05011400  | 1.59443100  | 0.48527400  |
| H | 2.56921700  | 2.54464600  | 1.70700100  |
| C | 4.59525000  | 0.38234400  | 0.03538500  |
| H | 4.50553300  | -1.77423300 | 0.21541300  |
| H | 4.47041700  | 2.52187500  | 0.10797200  |
| C | 1.89582300  | 1.50954700  | 4.60868800  |
| C | 1.75128700  | 0.40007900  | 3.86434900  |
| H | 2.05230700  | -0.56408000 | 4.28029400  |
| H | 2.24102600  | 1.46816500  | 5.64208900  |
| H | 1.69351700  | 2.50289000  | 4.21360900  |
| O | 3.23291800  | -1.78089800 | -3.58952000 |
| O | -3.54483800 | 5.05856000  | -1.65953200 |
| O | -5.06419200 | -4.22295000 | 0.67846000  |
| C | -6.20236100 | -4.25166000 | -0.17062500 |
| H | -5.91757500 | -4.33228300 | -1.22806300 |
| H | -6.76967900 | -5.13836500 | 0.11628200  |
| H | -6.83101900 | -3.36167800 | -0.03579300 |
| C | 3.24916000  | -3.10094900 | -4.11126700 |
| H | 4.15204800  | -3.17459300 | -4.71970000 |
| H | 3.28918400  | -3.85267900 | -3.31172300 |
| H | 2.37246700  | -3.29797200 | -4.74238100 |
| C | -3.73777900 | 5.31959700  | -3.04214900 |
| H | -4.23910800 | 6.28699600  | -3.09883400 |
| H | -2.78280000 | 5.37572000  | -3.58100500 |



|   |             |             |             |
|---|-------------|-------------|-------------|
| H | -4.37124600 | 4.55698500  | -3.51432500 |
| O | 5.59391800  | 0.48955700  | -0.89684900 |
| C | 6.05529800  | -0.70357800 | -1.51313800 |
| H | 6.80381100  | -0.39364800 | -2.24523600 |
| H | 6.52789300  | -1.38140800 | -0.78881400 |
| H | 5.24191300  | -1.23058200 | -2.02941500 |

(N) The final product complex

Total energy: -1932.12922407 Hartree

Free energy: -1931.660519 Hartree

|    |             |             |             |
|----|-------------|-------------|-------------|
| Pd | -0.22143200 | 0.09517900  | -2.50659800 |
| C  | 2.01454700  | -1.39198900 | -0.19075200 |
| C  | 3.14549700  | -1.33086800 | 0.63102800  |
| C  | 1.70434500  | -2.61921100 | -0.80615100 |
| C  | 3.94839500  | -2.45421600 | 0.84812000  |
| H  | 3.41597000  | -0.39459300 | 1.10975100  |
| C  | 2.48660700  | -3.74489800 | -0.59271000 |
| H  | 0.84274500  | -2.67671200 | -1.46639700 |
| C  | 3.61682500  | -3.66984600 | 0.23678400  |
| H  | 4.82079600  | -2.36718000 | 1.48481700  |
| H  | 2.25549800  | -4.69369900 | -1.06594800 |
| C  | -0.26949200 | -0.02812100 | 0.93975500  |
| C  | -1.43758500 | 0.75564100  | 0.88154400  |
| C  | -0.06309500 | -0.82773100 | 2.06858700  |
| C  | -2.35618800 | 0.74796600  | 1.92006900  |
| H  | -1.64308200 | 1.35109600  | -0.00310400 |
| C  | -0.99296400 | -0.86294200 | 3.11357100  |
| H  | 0.82593800  | -1.44616800 | 2.14042200  |
| C  | -2.14598800 | -0.07519500 | 3.03593500  |
| H  | -3.26585100 | 1.33611600  | 1.87074100  |
| H  | -0.80839800 | -1.50745100 | 3.96490900  |
| C  | 1.95447800  | 1.48964000  | -0.09754900 |
| C  | 2.69478800  | 2.07416300  | -1.14241000 |
| C  | 2.07452100  | 2.03550000  | 1.18495500  |
| C  | 3.53424700  | 3.15327500  | -0.90829500 |
| H  | 2.60245000  | 1.67591300  | -2.15007900 |

|   |             |             |             |
|---|-------------|-------------|-------------|
| C | 2.90998200  | 3.12819000  | 1.43466700  |
| H | 1.50589000  | 1.61090000  | 2.00684400  |
| C | 3.64681700  | 3.68959800  | 0.38459700  |
| H | 4.10634000  | 3.61056000  | -1.70892300 |
| H | 2.97274300  | 3.52863000  | 2.43952400  |
| C | -3.14519300 | -0.34191500 | -2.20106800 |
| C | -3.54591300 | -1.29782400 | -1.25669600 |
| C | -3.69676500 | 0.95108000  | -2.08972000 |
| C | -4.42209400 | -0.98933800 | -0.21616800 |
| H | -3.13560500 | -2.30276300 | -1.31672600 |
| C | -4.57038600 | 1.27316900  | -1.06362400 |
| H | -3.41984200 | 1.71800700  | -2.80585900 |
| C | -4.92700800 | 0.30988400  | -0.10544000 |
| H | -4.67459800 | -1.75142500 | 0.51086700  |
| H | -4.98261100 | 2.27246000  | -0.96695400 |
| C | -1.61462000 | 0.10213000  | -4.21798400 |
| C | -2.15030900 | -0.71389300 | -3.22636400 |
| H | -1.97983200 | -1.78731800 | -3.31088600 |
| H | -1.11120000 | -0.34973200 | -5.06873200 |
| H | -1.94745100 | 1.12773800  | -4.35874500 |
| O | -3.13936600 | -0.05325700 | 3.97765400  |
| O | 4.48976100  | 4.75377900  | 0.50863200  |
| O | 4.32380900  | -4.82728600 | 0.37491600  |
| C | 5.49018200  | -4.81164400 | 1.18376000  |
| H | 5.25870900  | -4.55243000 | 2.22561300  |
| H | 5.89551500  | -5.82415900 | 1.14848200  |
| H | 6.24119900  | -4.10880100 | 0.79933800  |
| C | -2.98849400 | -0.86585100 | 5.13178400  |
| H | -3.87827200 | -0.69533700 | 5.74018900  |
| H | -2.92597700 | -1.93139800 | 4.87340300  |
| H | -2.09781600 | -0.58650700 | 5.70985800  |
| C | 4.63286800  | 5.35390900  | 1.78700900  |
| H | 5.33790900  | 6.17653100  | 1.65698700  |
| H | 3.67878100  | 5.75157000  | 2.15769100  |
| H | 5.03600800  | 4.64714900  | 2.52469500  |
| O | -5.74103800 | 0.75067700  | 0.89863000  |

|   |             |             |             |
|---|-------------|-------------|-------------|
| C | -6.05407400 | -0.15081800 | 1.95372700  |
| H | -6.70632800 | 0.40099100  | 2.63293900  |
| H | -6.58944200 | -1.03547300 | 1.58392200  |
| H | -5.15285200 | -0.46187100 | 2.49604100  |
| P | 0.89331100  | 0.03791700  | -0.49037100 |

(O) PdL

Total energy: -1507.88312295 Hartree

Free energy: -1507.569249 Hartree

|    |             |             |             |
|----|-------------|-------------|-------------|
| Pd | 0.00073100  | 0.00016700  | 3.17716200  |
| C  | 1.48132400  | -0.75900700 | 0.16539800  |
| C  | 1.41929400  | -1.51385300 | -1.01096000 |
| C  | 2.74215100  | -0.54529700 | 0.75385200  |
| C  | 2.57346400  | -2.04276900 | -1.59695000 |
| H  | 0.46069700  | -1.70019700 | -1.48475600 |
| C  | 3.89611700  | -1.05476500 | 0.17809300  |
| H  | 2.80643600  | 0.02146800  | 1.67914900  |
| C  | 3.81966400  | -1.81080800 | -1.00306400 |
| H  | 2.48542800  | -2.62879600 | -2.50405000 |
| H  | 4.87108600  | -0.89513700 | 0.62693500  |
| C  | -0.08361400 | 1.66195300  | 0.16533300  |
| C  | -0.90020600 | 2.64646100  | 0.75317300  |
| C  | 0.60218500  | 1.98626800  | -1.01024500 |
| C  | -1.03607100 | 3.90062100  | 0.17756200  |
| H  | -1.42391200 | 2.41829700  | 1.67795400  |
| C  | 0.48303800  | 3.25034200  | -1.59606700 |
| H  | 1.24382700  | 1.24982000  | -1.48362300 |
| C  | -0.34205800 | 4.21304700  | -1.00282100 |
| H  | -1.66262500 | 4.66473600  | 0.62595900  |
| H  | 1.03533900  | 3.46757000  | -2.50259000 |
| C  | -1.39786400 | -0.90359500 | 0.16556500  |
| C  | -1.84412500 | -2.10165100 | 0.75472200  |
| C  | -2.02020600 | -0.47273400 | -1.01112000 |
| C  | -2.86264100 | -2.84607200 | 0.17921200  |
| H  | -1.38600600 | -2.44024300 | 1.68047500  |
| C  | -3.05559900 | -1.20763100 | -1.59688100 |

|   |             |             |             |
|---|-------------|-------------|-------------|
| H | -1.70203000 | 0.45028500  | -1.48541400 |
| C | -3.47859500 | -2.40228900 | -1.00239900 |
| H | -3.21258900 | -3.76967900 | 0.62864200  |
| H | -3.51867800 | -0.83864100 | -2.50430300 |
| O | -0.53461300 | 5.47451800  | -1.48234700 |
| O | -4.47516600 | -3.19936800 | -1.48180200 |
| O | 5.00834400  | -2.27485400 | -1.48267600 |
| C | 4.99647000  | -3.06157300 | -2.66412800 |
| H | 4.59895000  | -2.50138300 | -3.52108600 |
| H | 6.03658800  | -3.32638300 | -2.86094200 |
| H | 4.40864300  | -3.97993200 | -2.53418800 |
| C | 0.15357500  | 5.85809200  | -2.66310200 |
| H | -0.13758600 | 6.89110100  | -2.86013800 |
| H | 1.24271800  | 5.80885200  | -2.53210800 |
| H | -0.13156800 | 5.23361500  | -3.52038700 |
| C | -5.14992800 | -2.79601200 | -2.66371600 |
| H | -5.89961200 | -3.56412300 | -2.86040200 |
| H | -5.65094000 | -1.82745800 | -2.53446800 |
| H | -4.46570000 | -2.73262100 | -3.52046900 |
| P | 0.00007500  | -0.00023600 | 0.95908200  |
